# Supplementary material for: HIV status alters disease severity and immune cell responses in Beta variant SARS-CoV-2 infection wave
Source: eLife. 2021 Oct 5;10:e67397. doi: 10.7554/eLife.67397 (PMC8676326; doi:10.7554/eLife.67397)
Supplement: Source data 1. [file elife-67397-data1.xlsx]

## Sheet: Sheet1
Deidentified_PID	Timepoint	Participant_Type	Wave	Telephonic_Follow_Up	Age_Bin	Date_Diagnostic_Swab	Enrolment_Date	DaysSwabToVisit	DaysSymptomToVisit	DaysBetweenSwabAndSympt	Sex_	Race_	Pregnancy_	Disease_Severity	WHO_Ordinal_Scale	HIV_Status	Viral_Load	ART_Start_Date	LCMSMS_ARVs_Detected	TFV	FTC	EFV	DTG	NVP	AZT	ABC	Lam	LPV	RTV	ATV	Active_TB	TB_History	qPCR_Result_	qPCR_RawAverageSARSCt	CD4_Abs	CD8_Abs	CD4CD8_Ratio	Neutrophils_Abs	Monocytes_Abs	Lymphocytes_Abs	NLR	Current_Smoker	BMI	Diabetes_	Hypertension_	HeartDisease	CKD	Cancer_	Asthma
1	1	Case	1	No	40-49	jun2020	jun2020	5	5	0	F	African	No	Mild	3	POSITIVE	40	jun2005	Yes	0	0	<150	0	0	0	0	0	0	0	0	No	No	Detected	27.7038573166667	105	284	0.369718	3.89	0.36	0.59	6.59322	No	24.6914	Yes	No	No	No	No	No
1	3	Case	1	No	40-49	jun2020	jun2020	23	23	0	F	African	No	Mild	2	POSITIVE	965	jun2005	Yes	0	<20	400	0	0	0	0	0	0	0	0	No	No	Inconclusive	N/A	265	841	0.315101	1.62	0.41	1.26	1.28571	No	24.6914	Yes	No	No	No	No	No
1	5	Case	1	No	40-49	jun2020	jun2020	33	33	0	F	African	No	Asymptomatic	1	POSITIVE	172	jun2005	Yes	0	0	2050	0	0	0	0	0	0	0	0	No	No	Not Detected	N/A	192	721	0.266297	1.6	0.31	1.09	1.46789	No	24.6914	Yes	No	No	No	No	No
1	6	Case	1	No	40-49	jun2020	jun2020	111	111	0	F	African	No	Asymptomatic	1	POSITIVE	8864	jun2005	Yes	0	0	<150	0	0	0	0	0	0	0	0	No	No	Not Detected	N/A	147	585	0.251282	1.77	0.32	1.07	1.65421	No	24.6914	Yes	No	No	No	No	No
1	7	Case	1	No	40-49	jun2020	jun2020	177	177	0	F	African	No	Asymptomatic	1	POSITIVE	5550	jun2005	Yes	0	0	327	0	0	0	0	0	0	0	0	No	No	Not Detected	N/A	87	408	0.213235	2.46	0.13	0.69	3.56522	No	24.6914	Yes	No	No	No	No	No
1	8	Case	1	No	40-49	jun2020	jun2020	278	278	0	F	African	No	Asymptomatic	1	POSITIVE	760	jun2005													No	No	Not Detected	N/A	172	655	0.262595	1.57	0.31	1.09	1.44037	No	24.6914	Yes	No	No	No	No	No
2	1	Case	1	No	30-39	jun2020	jun2020	2	4	2	F	African	Yes	Mild	3	POSITIVE	40	apr2018	Yes	0	0	<150	0	0	0	0	0	0	0	0	No	No	Not Detected	N/A	597	408	1.46324	3.15	0.49	1.34	2.35075	No		No	No	No	No	No	No
2	2	Case	1	No	30-39	jun2020	jun2020	11	13	2	F	African	Yes	Asymptomatic	1	POSITIVE	40	apr2018	Yes	0	<20	251	0	0	0	0	0	0	0	0	No	No	Detected	19.7876368	839	570	1.47193	7.01	0.67	1.59	4.4088	No		No	No	No	No	No	No
2	3	Case	1	No	30-39	jun2020	jun2020	18	20	2	F	African	Yes	Asymptomatic	1	POSITIVE	40	apr2018	Yes	0	0	193	0	0	0	0	0	0	0	0	No	No	Not Detected	N/A	835	541	1.54344	4.64	0.41	1.72	2.69767	No		No	No	No	No	No	No
2	5	Case	1	No	30-39	jun2020	jun2020	30	32	2	F	African	Yes	Asymptomatic	1	POSITIVE	40	apr2018	Yes	0	0	219	0	0	0	0	0	0	0	0	No	No	Not Detected	N/A	744	526	1.41445	4.4	0.52	1.53	2.87582	No		No	No	No	No	No	No
2	6	Case	1	No	30-39	jun2020	jun2020	106	108	2	F	African	Yes	Asymptomatic	1	POSITIVE	40	apr2018	Yes	0	0	<150	0	0	0	0	0	0	0	0	No	No	Not Detected	N/A	435	277	1.5704	4.68	0.2	0.81	5.77778	No		No	No	No	No	No	No
2	7	Case	1	No	30-39	jun2020	jun2020	183	185	2	F	African	No	Asymptomatic	1	POSITIVE	40	apr2018	Yes	<90	0	0	888.8	0	0	0	<180	0	0	0	No	No	Not Detected	N/A	932	644	1.4472	2.32	0.39	1.91	1.21466	No		No	No	No	No	No	No
2	8	Case	1	No	30-39	jun2020	jun2020	273	275	2	F	African	No	Asymptomatic	1	POSITIVE	40	apr2018													No	No	2Targets	>37.315	884	590	1.49831	3.04	0.46	1.96	1.55102	No		No	No	No	No	No	No
3	1	Case	1	No	30-39	may2020	jun2020	20	21	1	F	African	No	Mild	3	POSITIVE	43823	sep2016	No	0	0	0	0	0	0	0	0	0	0	0	No	No	Not Detected	N/A	751	688	1.09157	14.05	0.85	1.83	7.6776	No	42.8617	No	No	No	No	No	No
3	6	Case	1	No	30-39	may2020	jun2020	125	126	1	F	African	No	Asymptomatic	1	POSITIVE	354	sep2016													No	No	Not Detected	N/A	1389	2242	0.619536	8.18	0.42	4.33	1.88915	No	42.8617	No	No	No	No	No	No
4	1	Case	1	No	20-29	jun2020	jun2020	5	5	0	F	African	Yes	Mild	3	POSITIVE	8889	oct2019	No	0	0	0	0	0	0	0	0	0	0	0	No	No	Detected	31.11495176666667	540	645	0.837209	3.14	0.29	1.39	2.25899	No		No	No	No	No	No	No
5	1	Case	1	No	50-59	jun2020	jun2020	4	8	4	M	Asian		Mild	3	NEGATIVE			No	0	0	0	0	0	0	0	0	0	0	0	No	No	Detected	21.96687820666667	492	292	1.68493	8.84	1.15	1.39	6.35971	No	20.7612	No	No	No	No	No	No
5	2	Case	1	No	50-59	jun2020	jun2020	12	16	4	M	Asian		Asymptomatic	1	NEGATIVE			No	0	0	0	0	0	0	0	0	0	0	0	No	No	Not Detected	N/A	659	220	2.99545	7.42	1.14	1.64	4.52439	No	20.7612	No	No	No	No	No	No
5	3	Case	1	No	50-59	jun2020	jun2020	18	22	4	M	Asian		Asymptomatic	1	NEGATIVE															No	No	Not Detected	N/A	755	306	2.46732	5.84	1.02	1.72	3.39535	No	20.7612	No	No	No	No	No	No
5	4	Case	1	No	50-59	jun2020	jun2020	25	29	4	M	Asian		Mild	2	NEGATIVE															No	No	Not Detected	N/A	547	211	2.59242	4.32	0.46	1.36	3.17647	No	20.7612	No	No	No	No	No	No
5	7	Case	1	Yes	50-59	jun2020	jun2020	175	179	4	M	Asian		Asymptomatic	1	NEGATIVE															No	No										No	20.7612	No	No	No	No	No	No
6	1	Case	1	No	40-49	jun2020	jun2020	4	6	2	M	African		Mild	3	NEGATIVE			No	0	0	0	0	0	0	0	0	0	0	0	No	No	Inconclusive	N/A	264	377	0.700265	4.89	0.38	0.98	4.9898	No	34.2561	No	No	No	No	No	No
6	7	Case	1	Yes	40-49	jun2020	jun2020	175	177	2	M	African		Asymptomatic	1	NEGATIVE															No	No										No	34.2561	No	No	No	No	No	No
7	1	Case	1	No	40-49	jun2020	jun2020	6			M	African		Mild	3	POSITIVE	40	jan2017	Yes	0	<20	1110	0	0	0	0	0	0	0	0	No	No	Not Detected	N/A	259	443	0.58465	3.05	0.27	0.73	4.17808	No	25.3086	Yes	No	No	No	No	No
7	2	Case	1	No	40-49	jun2020	jun2020	13			M	African		Asymptomatic	1	POSITIVE	40	jan2017	Yes	<90	178.47	>5000	0	0	0	0	0	0	0	0	No	No	Detected	33.80310384333333	415	709	0.585331	1.47	0.38	1.16	1.26724	No	25.3086	Yes	No	No	No	No	No
7	7	Case	1	No	40-49	jun2020	jun2020	178			M	African		Mild	2	POSITIVE	40	jan2017	Yes	<90	242.19	>5000	0	0	0	0	0	0	0	0	No	No	Not Detected	N/A	432	986	0.438134	2.63	0.33	1.67	1.57485	No	25.3086	Yes	No	No	No	No	No
7	8	Case	1	No	40-49	jun2020	jun2020	291			M	African		Asymptomatic	1	POSITIVE	40	jan2017													No	No	Not Detected	N/A	480	1509	0.318091	3.12	0.42	2.35	1.32766	No	25.3086	Yes	No	No	No	No	No
8	1	Case	1	No	20-29	jun2020	jun2020	8			F	African	No	Mild	3	NEGATIVE			No	0	0	0	0	0	0	0	0	0	0	0	No	No		.	1444	609	2.3711	1.76	0.25	2.49	0.706827	No	17.3484	No	No	No	No	No	No
8	2	Case	1	No	20-29	jun2020	jun2020	15			F	African	No	Mild	3	NEGATIVE															No	No	Detected	28.73962679666667	945	378	2.5	4.87	0.6	1.81	2.69061	No	17.3484	No	No	No	No	No	No
8	3	Case	1	No	20-29	jun2020	jun2020	21			F	African	No	Asymptomatic	1	NEGATIVE															No	No	Inconclusive	N/A	633	354	1.78814	7.68	0.25	1.45	5.29655	No	17.3484	No	No	No	No	No	No
8	5	Case	1	No	20-29	jun2020	jun2020	35			F	African	No	Mild	2	NEGATIVE															No	No	Not Detected	N/A	1071	466	2.29828	2.84	0.54	2.23	1.27354	No	17.3484	No	No	No	No	No	No
8	6	Case	1	Yes	20-29	jun2020	jun2020	99			F	African	No	Asymptomatic	1	NEGATIVE															No	No										No	17.3484	No	No	No	No	No	No
9	1	Case	1	No	40-49	jun2020	jul2020	4	11	7	F	African	No	Mild	3	POSITIVE	40		Yes	<90	67.27	>5000	0	0	0	0	0	0	0	0	No	No	Detected	30.49109984666667	706	833	0.847539	3.74	0.45	2.04	1.83333	No	23.3377	No	No	No	No	No	No
9	2	Case	1	No	40-49	jun2020	jul2020	11	18	7	F	African	No	Mild	3	POSITIVE	40		Yes	<90	163.7	>5000	0	0	0	0	0	0	0	0	No	No	Not Detected	N/A	590	751	0.785619	4.6	0.7	1.81	2.54144	No	23.3377	No	No	No	No	No	No
9	3	Case	1	No	40-49	jun2020	jul2020	18	25	7	F	African	No	Asymptomatic	1	POSITIVE	40		Yes	<90	97.7	>5000	0	0	0	0	0	0	0	0	No	No	Not Detected	N/A	760	1055	0.720379	6.56	0.58	2.3	2.85217	No	23.3377	No	No	No	No	No	No
9	4	Case	1	No	40-49	jun2020	jul2020	25	32	7	F	African	No	Asymptomatic	1	POSITIVE	40		Yes	<90	178.7	>5000	0	0	0	0	0	0	0	0	No	No	Detected	32.20353720666666	553	829	0.667069	6.86	0.6	1.86	3.68817	No	23.3377	No	No	No	No	No	No
9	5	Case	1	No	40-49	jun2020	jul2020	32	39	7	F	African	No	Asymptomatic	1	POSITIVE	40		Yes	<90	140.8	541	0	0	0	0	0	0	0	0	No	No	Not Detected	N/A	643	924	0.695887	4.84	0.54	2.09	2.31579	No	23.3377	No	No	No	No	No	No
9	6	Case	1	No	40-49	jun2020	jul2020	96	103	7	F	African	No	Asymptomatic	1	POSITIVE	40		Yes	<90	97.46	>5000	0	0	0	0	0	0	0	0	No	No	Not Detected	N/A	749	1096	0.683394	4.89	0.63	2.55	1.91765	No	23.3377	No	No	No	No	No	No
9	7	Case	1	No	40-49	jun2020	jul2020	170	177	7	F	African	No	Mild	2	POSITIVE	40		Yes	<90	91.99	>5000	0	0	0	0	0	0	0	0	No	No	Not Detected	N/A	615	843	0.729537	4.14	0.52	1.99	2.0804	No	23.3377	No	No	No	No	No	No
9	8	Case	1	No	40-49	jun2020	jul2020	277	284	7	F	African	No	Asymptomatic	1	POSITIVE	40														No	No	Not Detected	N/A	692	879	0.787258	5.35	0.57	2.22	2.40991	No	23.3377	No	No	No	No	No	No
10	1	Case	1	No	20-29	jun2020	jul2020	15			F	African	No	Mild	3	NEGATIVE			No	0	0	0	0	0	0	0	0	0	0	0	No	No	Not Detected	N/A	1099	562	1.95552	2.43	0.47	2.43	1	No	28.125	No	No	No	No	No	No
10	2	Case	1	No	20-29	jun2020	jul2020	22			F	African	No	Asymptomatic	1	NEGATIVE															No	No	Not Detected	N/A	927	498	1.86145	3.16	0.44	2.3	1.37391	No	28.125	No	No	No	No	No	No
10	3	Case	1	No	20-29	jun2020	jul2020	29			F	African	No	Asymptomatic	1	NEGATIVE															No	No	Not Detected	N/A	902	459	1.96514	2.99	0.41	2.23	1.34081	No	28.125	No	No	No	No	No	No
10	4	Case	1	No	20-29	jun2020	jul2020	36			F	African	No	Asymptomatic	1	NEGATIVE															No	No	Not Detected	N/A	809	395	2.0481	2.21	0.4	2.6	0.85	No	28.125	No	No	No	No	No	No
10	6	Case	1	Yes	20-29	jun2020	jul2020	105			F	African	No	Asymptomatic	1	NEGATIVE															No	No										No	28.125	No	No	No	No	No	No
11	1	Case	1	No	40-49	jul2020	jul2020	3	4	1	F	African	No	Mild	3	POSITIVE	40	jun2007	Yes	0	0	0	0	0	0	<180	227	>6000	683.1	0	No	No	Detected	28.33072131666666	176	473	0.372093	5.71	0.44	1.07	5.33645	No	27.3438	No	Yes	No	No	No	No
11	3	Case	1	No	40-49	jul2020	jul2020	16	17	1	F	African	No	Asymptomatic	1	POSITIVE	40	jun2007	Yes	0	0	0	0	0	0	490	1117	>6000	528.1	0	No	No	2Targets	>34.329447625	520	1358	0.382916	2.89	0.54	2.07	1.39614	No	27.3438	No	Yes	No	No	No	No
11	5	Case	1	No	40-49	jul2020	jul2020	31	32	1	F	African	No	Asymptomatic	1	POSITIVE	40	jun2007	Yes	0	0	0	0	0	0	0	278.3	4540	319.2	0	No	No	Detected	33.07449872	600	1620	0.37037	1.9	0.55	2.65	0.716981	No	27.3438	No	Yes	No	No	No	No
11	6	Case	1	No	40-49	jul2020	jul2020	94	95	1	F	African	No	Asymptomatic	1	POSITIVE	40	jun2007	Yes	0	0	0	0	0	0	<180	233.9	>6000	184.9	0	No	No	Not Detected	N/A	695	1743	0.398738	2.41	0.38	2.82	0.85461	No	27.3438	No	Yes	No	No	No	No
11	7	Case	1	No	40-49	jul2020	jul2020	193	194	1	F	African	No	Mild	2	POSITIVE	40	jun2007	Yes	0	0	0	0	0	0	<180	263.3	2975.5	<180	0	No	No	Not Detected	N/A	734	1810	0.405525	3.1	0.62	3.2	0.96875	No	27.3438	No	Yes	No	No	No	No
11	8	Case	1	No	40-49	jul2020	jul2020	282	283	1	F	African	No	Asymptomatic	1	POSITIVE		jun2007													No	No	Not Detected	N/A	703	1741	0.403791	2.73	0.69	2.81	0.97153	No	27.3438	No	Yes	No	No	No	No
12	1	Case	1	No	50-59	jun2020	jul2020	13	16	3	M	Indian		Mild	2	NEGATIVE															No	No	Not Detected	N/A	939	313	3	4.32	0.5	1.78	2.42697	No	20.4382	No	No	No	No	No	No
12	2	Case	1	No	50-59	jun2020	jul2020	20	23	3	M	Indian		Mild	2	NEGATIVE															No	No	Not Detected	N/A	880	340	2.58824	4.59	0.4	1.65	2.78182	No	20.4382	No	No	No	No	No	No
12	3	Case	1	No	50-59	jun2020	jul2020	27	30	3	M	Indian		Mild	2	NEGATIVE															No	No	Not Detected	N/A	807	303	2.66337	4.85	0.38	1.67	2.90419	No	20.4382	No	No	No	No	No	No
12	4	Case	1	No	50-59	jun2020	jul2020	34	37	3	M	Indian		Mild	2	NEGATIVE															No	No	Detected	24.58410311666666	527	228	2.3114	3.12	0.68	1.08	2.88889	No	20.4382	No	No	No	No	No	No
12	5	Case	1	No	50-59	jun2020	jul2020	55	58	3	M	Indian		Mild	2	NEGATIVE															No	No	Not Detected	N/A	870	401	2.16958	4.49	0.42	1.67	2.68862	No	20.4382	No	No	No	No	No	No
12	6	Case	1	Yes	50-59	jun2020	jul2020	126	129	3	M	Indian		Asymptomatic	1	NEGATIVE															No	No										No	20.4382	No	No	No	No	No	No
12	7	Case	1	Yes	50-59	jun2020	jul2020	202	205	3	M	Indian		Asymptomatic	1	NEGATIVE															No	No										No	20.4382	No	No	No	No	No	No
12	8	Case	1	No	50-59	jun2020	jul2020	293	296	3	M	Indian		Mild	2	NEGATIVE															No	No	Not Detected	N/A	923	359	2.57103	4.19	0.42	1.72	2.43605	No	20.4382	No	No	No	No	No	No
13	1	Case	1	No	80-89	jun2020	jul2020	10	15	5	F	African	No	Supplemental Oxygen or Death	4	NEGATIVE															No	No	Detected	23.53529812666666	606	396	1.5303	2.44	0.41	1.5	1.62667	No		No	No	No	No	No	No
13	2	Case	1	No	80-89	jun2020	jul2020	17	22	5	F	African	No	Mild	3	NEGATIVE															No	No	Not Detected	N/A	720	465	1.54839	2.9	0.64	1.93	1.50259	No		No	No	No	No	No	No
13	3	Case	1	No	80-89	jun2020	jul2020	24	29	5	F	African	No	Mild	2	NEGATIVE															No	No	Not Detected	N/A	751	528	1.42235	2.51	0.49	1.99	1.26131	No		No	No	No	No	No	No
13	4	Case	1	No	80-89	jun2020	jul2020	31	36	5	F	African	No	Asymptomatic	1	NEGATIVE															No	No	Inconclusive	N/A	870	573	1.51832	2.35	0.71	2.13	1.10329	No		No	No	No	No	No	No
13	5	Case	1	No	80-89	jun2020	jul2020	38	43	5	F	African	No	Asymptomatic	1	NEGATIVE															No	No	Not Detected	N/A	755	494	1.52834	3.03	0.64	2.23	1.35874	No		No	No	No	No	No	No
13	6	Case	1	No	80-89	jun2020	jul2020	101	106	5	F	African	No	Mild	2	NEGATIVE															No	No	Not Detected	N/A	956	640	1.49375	2.16	0.53	2.18	0.990826	No		No	No	No	No	No	No
13	8	Case	1	No	80-89	jun2020	jul2020	283	288	5	F	African	No	Asymptomatic	1	NEGATIVE															No	No	Not Detected	N/A	1038	712	1.45787	4.31	0.67	2.63	1.63878	No		No	No	No	No	No	No
14	1	Case	1	No	60-69	jul2020	jul2020	13	13	0	F	African	No	Mild	3	NEGATIVE															No	No	Detected	29.73520663666666	985	571	1.72504	1.92	0.36	2.3	0.834783	No	37.6542	Yes	Yes	No	No	No	Yes
14	2	Case	1	No	60-69	jul2020	jul2020	20	20	0	F	African	No	Asymptomatic	1	NEGATIVE															No	No	Detected	31.34824576	989	651	1.5192	3.18	0.43	2.19	1.45205	No	37.6542	Yes	Yes	No	No	No	Yes
14	3	Case	1	No	60-69	jul2020	jul2020	27	27	0	F	African	No	Mild	2	NEGATIVE															No	No	Not Detected	N/A	1348	849	1.58775	2.77	0.51	2.8	0.989286	No	37.6542	Yes	Yes	No	No	No	Yes
14	4	Case	1	No	60-69	jul2020	jul2020	34	34	0	F	African	No	Mild	2	NEGATIVE															No	No	Not Detected	N/A	1025	673	1.52303	2.9	0.33	2.26	1.28319	No	37.6542	Yes	Yes	No	No	No	Yes
14	5	Case	1	No	60-69	jul2020	jul2020	41	41	0	F	African	No	Mild	2	NEGATIVE															No	No	Not Detected	N/A	905	615	1.47154	3.23	0.35	2.1	1.5381	No	37.6542	Yes	Yes	No	No	No	Yes
14	6	Case	1	No	60-69	jul2020	jul2020	104	104	0	F	African	No	Mild	2	NEGATIVE															No	No	Not Detected	N/A	1009	654	1.54281	1.85	0.35	2.23	0.829596	No	37.6542	Yes	Yes	No	No	No	Yes
14	7	Case	1	No	60-69	jul2020	jul2020	204	204	0	F	African	No	Mild	2	NEGATIVE															No	No	Inconclusive	N/A				1.81	0.31	2.05	0.882927	No	37.6542	Yes	Yes	No	No	No	Yes
14	8	Case	1	No	60-69	jul2020	jul2020	286	286	0	F	African	No	Mild	2	NEGATIVE															No	No	Not Detected	N/A	1246	778	1.60154	2.56	0.45	2.54	1.00787	No	37.6542	Yes	Yes	No	No	No	Yes
15	1	Case	1	No	40-49	jul2020	jul2020	4	21	17	F	African	No	Supplemental Oxygen or Death	4	POSITIVE	40	jan2006	Yes	0	0	0	0	0	0	0	340	>6000	679.1	0	No	Yes	Detected	18.05291159333333	201	644	0.312112	5.7	0.9	1.31	4.35115	No	17.313	Yes	No	No	No	No	Yes
15	2	Case	1	No	40-49	jul2020	jul2020	11	28	17	F	African	No	Supplemental Oxygen or Death	4	POSITIVE	40	jan2006	Yes	0	0	0	0	0	0	0	329	>6000	554.1	0	No	Yes	Detected	20.75589570333333	173	623	0.277689	22.57	1.29	1.11	20.3333	No	17.313	Yes	No	No	No	No	Yes
15	3	Case	1	No	40-49	jul2020	jul2020	18	35	17	F	African	No	Supplemental Oxygen or Death	4	POSITIVE	40	jan2006	Yes	0	0	0	0	0	0	0	466	>6000	1030.1	0	No	Yes	Detected	24.23435236666667	114	333	0.342342	4.12	0.39	0.68	6.05882	No	17.313	Yes	No	No	No	No	Yes
15	4	Case	1	Yes	40-49	jul2020	jul2020	23	40	17	F	African	No	Supplemental Oxygen or Death	8	POSITIVE		jan2006													No	Yes		.								No	17.313	Yes	No	No	No	No	Yes
16	1	Case	1	No	50-59	jul2020	jul2020	7	7	0	M	African		Mild	3	POSITIVE	40	sep2012	Yes	0	0	1030	0	0	0	261	414	0	0	0	No	No	2Targets	>34.117476705	311	1080	0.287963	3.6	0.38	1.74	2.06897	No	36.9823	Yes	Yes	No	No	No	No
16	2	Case	1	No	50-59	jul2020	jul2020	14	14	0	M	African		Mild	2	POSITIVE	40	sep2012	Yes	0	0	1530	0	0	0	<180	268	0	0	0	No	No	Not Detected	N/A	434	1508	0.287798	1.99	0.49	2.52	0.789683	No	36.9823	Yes	Yes	No	No	No	No
16	5	Case	1	No	50-59	jul2020	jul2020	35	35	0	M	African		Asymptomatic	1	POSITIVE	77	sep2012	Yes	0	0	188	0	0	0	0	363.3	0	0	0	No	No	Not Detected	N/A	407	1373	0.296431	2.05	0.44	2.03	1.00985	No	36.9823	Yes	Yes	No	No	No	No
16	6	Case	1	No	50-59	jul2020	jul2020	97	97	0	M	African		Asymptomatic	1	POSITIVE	40	sep2012	Yes	0	0	1350	0	0	0	0	<180	0	0	0	No	No	Not Detected	N/A	439	1410	0.311348	2.12	0.4	2.35	0.902128	No	36.9823	Yes	Yes	No	No	No	No
16	6.1	Case	1	No	50-59	jul2020	jul2020	224	224	0	M	African		Mild	2	POSITIVE	40	sep2012													No	No	Not Detected	N/A	427	1247	0.342422	2.57	0.43	2.16	1.18981	No	36.9823	Yes	Yes	No	No	No	No
16	8	Case	1	No	50-59	jul2020	jul2020	279	279	0	M	African		Asymptomatic	1	POSITIVE	40	sep2012													No	No	Not Detected	N/A	490	1777	0.275746	2.09	0.42	2.76	0.757246	No	36.9823	Yes	Yes	No	No	No	No
17	1	Case	1	No	60-69	jul2020	jul2020	5	7	2	F	African	No	Supplemental Oxygen or Death	4	NEGATIVE															No	No	Detected	30.42618047333333	326	175	1.86286	4.67	0.8	1.03	4.53398	No	27.9421	No	Yes	No	No	No	No
17	2	Case	1	No	60-69	jul2020	jul2020	12	14	2	F	African	No	Mild	3	NEGATIVE															No	No	Not Detected	N/A	1025	538	1.9052	5.11	0.66	2.5	2.044	No	27.9421	No	Yes	No	No	No	No
17	4	Case	1	No	60-69	jul2020	jul2020	26	28	2	F	African	No	Mild	2	NEGATIVE															No	No	Inconclusive	N/A	1007	496	2.03024	2.61	0.51	1.76	1.48295	No	27.9421	No	Yes	No	No	No	No
17	5	Case	1	No	60-69	jul2020	jul2020	33	35	2	F	African	No	Mild	2	NEGATIVE															No	No	Not Detected	N/A	837	472	1.77331	2.21	0.6	1.66	1.33133	No	27.9421	No	Yes	No	No	No	No
17	6	Case	1	No	60-69	jul2020	jul2020	96	98	2	F	African	No	Mild	2	NEGATIVE															No	No	Not Detected	N/A	905	544	1.6636	2.22	0.37	1.92	1.15625	No	27.9421	No	Yes	No	No	No	No
17	7	Case	1	No	60-69	jul2020	jul2020	187	189	2	F	African	No	Mild	2	NEGATIVE															No	No	Not Detected	N/A	977	439	2.22551	2.64	0.3	1.82	1.45055	No	27.9421	No	Yes	No	No	No	No
18	1	Case	1	No	20-29	jul2020	jul2020	8	8	0	F	African	No	Mild	3	POSITIVE	40	aug2017	Yes	113.6	46.2	1700	0	0	0	>6000	0	0	0	0	No	No	Not Detected	N/A	497	785	0.633121	10.33	2.08	1.63	6.33742	No	22.317	No	No	No	No	No	No
18	4	Case	1	No	20-29	jul2020	jul2020	29	29	0	F	African	No	Mild	2	POSITIVE	40	aug2017	Yes	0	0	<150	0	0	0	<180	935.3	0	0	0	No	No	Not Detected	N/A	1131	1328	0.851657	4.78	0.81	2.78	1.71942	No	22.317	No	No	No	No	No	No
19	1	Case	1	No	30-39	jun2020	jul2020	29	20	-9	F	African	No	Mild	2	POSITIVE	22904	oct2016	Yes	0	0	0	0	0	0	<180	222	0	0	362	Yes	Yes	Not Detected	N/A	8	455	0.0175824	4.57	0.4	0.69	6.62319	No	18.9036	No	No	No	No	No	No
19	3	Case	1	No	30-39	jun2020	jul2020	43	34	-9	F	African	No	Mild	2	POSITIVE	87192	oct2016	Yes	0	0	0	0	0	0	0	<180	0	0	0	Yes	Yes	Not Detected	N/A	18	455	0.0395604	2.32	0.29	0.8	2.9	No	18.9036	No	No	No	No	No	No
19	6	Case	1	No	30-39	jun2020	jul2020	119	110	-9	F	African	No	Mild	2	POSITIVE		oct2016	Yes	0	0	0	0	0	0	0	<180	0	0	<180	Yes	Yes	Not Detected	N/A	9	379	0.0237467	2.69	0.4	0.52	5.17308	No	18.9036	No	No	No	No	No	No
19	7	Case	1	No	30-39	jun2020	jul2020	211	202	-9	F	African	No	Mild	2	POSITIVE	30353	oct2016	No	0	0	0	0	0	0	0	0	0	0	0	Yes	Yes	Not Detected	N/A	7	469	0.0149254	3.68	0.47	0.68	5.41176	No	18.9036	No	No	No	No	No	No
20	1	Case	1	No	40-49	jul2020	aug2020	21	40	19	F	Asian	No	Mild	2	NEGATIVE			No	0	0	0	0	0	0	0	0	0	0	0	No	No	Inconclusive	N/A	1116	743	1.50202	4.23	0.59	2.23	1.89686	No	28.6501	No	No	No	No	No	No
20	2	Case	1	No	40-49	jul2020	aug2020	28	47	19	F	Asian	No	Mild	2	NEGATIVE															No	No	Not Detected	N/A	1051	589	1.78438	4.07	0.51	2.1	1.9381	No	28.6501	No	No	No	No	No	No
20	3	Case	1	No	40-49	jul2020	aug2020	35	54	19	F	Asian	No	Asymptomatic	1	NEGATIVE															No	No	Inconclusive	N/A	1030	651	1.58218	4.57	0.43	2.01	2.27363	No	28.6501	No	No	No	No	No	No
20	4	Case	1	No	40-49	jul2020	aug2020	42	61	19	F	Asian	No	Asymptomatic	1	NEGATIVE															No	No	Not Detected	N/A	914	590	1.54915	3.82	0.7	1.94	1.96907	No	28.6501	No	No	No	No	No	No
20	5	Case	1	No	40-49	jul2020	aug2020	49	68	19	F	Asian	No	Asymptomatic	1	NEGATIVE															No	No	Not Detected	N/A	1025	606	1.69142	4.64	0.58	2.22	2.09009	No	28.6501	No	No	No	No	No	No
20	6	Case	1	No	40-49	jul2020	aug2020	108	127	19	F	Asian	No	Asymptomatic	1	NEGATIVE															No	No	Not Detected	N/A	1077	675	1.59556	4.76	0.51	2.18	2.18349	No	28.6501	No	No	No	No	No	No
20	7	Case	1	No	40-49	jul2020	aug2020	209	228	19	F	Asian	No	Asymptomatic	1	NEGATIVE															No	No	Not Detected	N/A	1136	679	1.67305	4.21	0.43	2.01	2.09453	No	28.6501	No	No	No	No	No	No
21	1	Case	1	No	30-39	jul2020	jul2020	9	10	1	F	African	Yes	Mild	3	POSITIVE	40	feb2018	Yes	<90	52.3	<150	0	0	0	0	0	0	0	0	No	No	Not Detected	N/A	663	546	1.21429	5.09	0.83	2	2.545	No		No	No	No	No	No	Yes
21	2	Case	1	No	30-39	jul2020	jul2020	16	17	1	F	African	Yes	Asymptomatic	1	POSITIVE	40	feb2018	Yes	<90	57	185	0	0	0	0	0	0	0	0	No	No	Not Detected	N/A	605	571	1.05954	5.71	0.56	1.74	3.28161	No		No	No	No	No	No	Yes
21	3	Case	1	No	30-39	jul2020	jul2020	23	24	1	F	African	No	Asymptomatic	1	POSITIVE	40	feb2018	Yes	<90	78.6	239	0	0	0	0	0	0	0	0	No	No	Not Detected	N/A	489	529	0.924386	2.98	0.45	1.55	1.92258	No	31.6346	No	No	No	No	No	Yes
21	7	Case	1	No	30-39	jul2020	jul2020	202	203	1	F	African	No	Asymptomatic	1	POSITIVE	40	feb2018													No	No	Not Detected	N/A	683	686	0.995627	1.55	0.27	1.73	0.895954	No	31.6346	No	No	No	No	No	Yes
22	1	Case	1	No	50-59	jul2020	jul2020	9	37	28	F	African	No	Mild	3	NEGATIVE															No	No	Not Detected	N/A	2170	1319	1.64519	7.87	1.52	5.13	1.53411	No	30.4705	Yes	Yes	No	No	No	No
22	3	Case	1	No	50-59	jul2020	jul2020	23	51	28	F	African	No	Mild	2	NEGATIVE															No	No	Not Detected	N/A	2109	1664	1.26743	7.15	1.04	4.58	1.56114	No	30.4705	Yes	Yes	No	No	No	No
22	4	Case	1	No	50-59	jul2020	jul2020	30	58	28	F	African	No	Mild	2	NEGATIVE															No	No	Inconclusive	N/A	2056	1513	1.35889	6.25	1.25	4.39	1.42369	No	30.4705	Yes	Yes	No	No	No	No
22	5	Case	1	No	50-59	jul2020	jul2020	37	65	28	F	African	No	Mild	2	NEGATIVE															No	No	Not Detected	N/A	1962	1571	1.24889	5.02	1.04	4.45	1.12809	No	30.4705	Yes	Yes	No	No	No	No
22	6	Case	1	No	50-59	jul2020	jul2020	107	135	28	F	African	No	Asymptomatic	1	NEGATIVE															No	No	Not Detected	N/A	781	1003	0.778664	16.15	1	2.42	6.67355	No	30.4705	Yes	Yes	No	No	No	No
22	7	Case	1	No	50-59	jul2020	jul2020	206	234	28	F	African	No	Mild	2	NEGATIVE															No	No	Not Detected	N/A	3601	1769	2.03561	7.72	1.38	7.06	1.09348	No	30.4705	Yes	Yes	No	No	No	No
23	1	Case	1	No	60-69	aug2020	aug2020	7	10	3	F	African	No	Supplemental Oxygen or Death	4	NEGATIVE															No	No	Detected	29.75665363666667	157	130	1.20769	18.68	0.82	0.7	26.6857	No	25.3906	No	Yes	No	No	No	No
23	6	Case	1	No	60-69	aug2020	aug2020	96	99	3	F	African	No	Asymptomatic	1	NEGATIVE															No	No	Not Detected	N/A	761	639	1.19092	4.69	0.56	1.94	2.41753	No	25.3906	No	Yes	No	No	No	No
24	1	Case	1	No	20-29	aug2020	aug2020	2	5	3	F	African	Yes	Supplemental Oxygen or Death	4	NEGATIVE															No	No	Detected	27.8834131433333	231	275	0.84	10.77	0.47	1.01	10.6634	No		No	No	No	No	No	No
25	1	Case	1	No	50-59	aug2020	aug2020	5	12	7	M	African		Supplemental Oxygen or Death	4	POSITIVE	2862		No	0	0	0	0	0	0	0	0	0	0	0	No	No	Detected	37.241194525	126	287	0.439024	12.59	0.22	0.79	15.9367	No	35.2941	No	Yes	No	No	No	No
25	2	Case	1	No	50-59	aug2020	aug2020	12	19	7	M	African		Asymptomatic	1	POSITIVE	122		Yes	<90	87.1	2210	0	0	0	0	0	0	0	0	No	No	Not Detected	N/A	309	757	0.40819	7.02	1	2.04	3.44118	No	35.2941	No	Yes	No	No	No	No
25	3	Case	1	No	50-59	aug2020	aug2020	19	26	7	M	African		Mild	2	POSITIVE	40		Yes	<90	0	706	2060	0	0	0	202.3	0	0	0	No	No	Not Detected	N/A	370	698	0.530086	5.61	0.55	1.44	3.89583	No	35.2941	No	Yes	No	No	No	No
25	4	Case	1	No	50-59	aug2020	aug2020	26	33	7	M	African		Mild	2	POSITIVE	40		Yes	<90	0	<150	1605.6	0	0	0	<180	0	0	0	No	No	Not Detected	N/A	422	683	0.617862	4.17	0.63	1.74	2.39655	No	35.2941	No	Yes	No	No	No	No
25	5	Case	1	No	50-59	aug2020	aug2020	33	40	7	M	African		Mild	2	POSITIVE	40		Yes	<90	0	<150	1115.6	0	0	0	<180	0	0	0	No	No	Not Detected	N/A	391	843	0.46382	5.16	0.65	1.88	2.74468	No	35.2941	No	Yes	No	No	No	No
25	6	Case	1	No	50-59	aug2020	aug2020	92	99	7	M	African		Asymptomatic	1	POSITIVE	40		No	0	0	0	0	0	0	0	0	0	0	0	No	No	Not Detected	N/A	534	714	0.747899	3.83	0.52	1.55	2.47097	No	35.2941	No	Yes	No	No	No	No
25	7	Case	1	No	50-59	aug2020	aug2020	175	182	7	M	African		Asymptomatic	1	POSITIVE	40		Yes	0	0	0	1870	0	0	0	<180	0	0	0	No	No	Not Detected	N/A	511	684	0.747076	4.9	0.59	1.78	2.75281	No	35.2941	No	Yes	No	No	No	No
26	1	Case	1	No	30-39	aug2020	aug2020	7	46	39	F	African	No	Mild	3	POSITIVE	1732		Yes	0	0	0	0	0	0	0	977.3	>6000	798.2	0	No	Yes	Not Detected	N/A	363	1423	0.255095	3.61	0.47	2.47	1.46154	No	35.693	No	No	No	No	No	No
26	6	Case	1	No	30-39	aug2020	aug2020	87	126	39	F	African	No	Mild	2	POSITIVE	2880		Yes	0	0	0	0	0	0	0	<180	>6000	281	0	No	Yes	Not Detected	N/A	276	985	0.280203	2.43	0.27	1.63	1.4908	No	35.693	No	No	No	No	No	No
27	1	Case	1	No	30-39	sep2020	oct2020	6	7	1	F	African	No	Supplemental Oxygen or Death	4	POSITIVE	34151	jun2015	No	0	0	0	0	0	0	0	0	0	0	0	No	Yes	Detected	16.40048231333333	6	330	0.0181818	6.25	0.24	0.72	8.68056	No	27.0051	No	No	No	No	No	Yes
27	3	Case	1	No	30-39	sep2020	oct2020	20	21	1	F	African	No	Mild	2	POSITIVE	6394	jun2015	No	0	0	0	0	0	0	0	0	0	0	0	No	Yes	Detected	19.20967892333333	6	351	0.017094	1.5	0.35	0.57	2.63158	No	27.0051	No	No	No	No	No	Yes
27	4	Case	1	Yes	30-39	sep2020	oct2020	26	27	1	F	African	No	Mild	2	POSITIVE		jun2015													No	Yes										No	27.0051	No	No	No	No	No	Yes
27	5	Case	1	No	30-39	sep2020	oct2020	34	35	1	F	African	No	Mild	2	POSITIVE	5477	jun2015	No	0	0	0	0	0	0	0	0	0	0	0	No	Yes	Detected	21.63	5	536	0.00932836	1.35	0.29	0.77	1.75325	No	27.0051	No	No	No	No	No	Yes
27	5.1	Case	1	No	30-39	sep2020	oct2020	71	72	1	F	African	No	Mild	2	POSITIVE	4309	jun2015	Yes	<90	305.19	1470	0	0	0	0	0	0	0	0	No	Yes	Detected	19.1766666666667	7	658	0.0106383	2.59	0.31	0.96	2.69792	No	27.0051	No	No	No	No	No	Yes
27	6	Case	1	No	30-39	sep2020	oct2020	106	107	1	F	African	No	Mild	2	POSITIVE	22905	jun2015	Yes	0	107.19	2460	0	0	0	0	0	0	0	0	No	Yes	Detected	26.94666667	15	532	0.0281955	1.83	0.3	0.86	2.12791	No	27.0051	No	No	No	No	No	Yes
27	7	Case	1	No	30-39	sep2020	oct2020	190	191	1	F	African	No	Mild	2	POSITIVE	14964	jun2015													No	Yes	Detected	21.30333333333333	6	461	0.0130152	1.67	0.28	0.81	2.06173	No	27.0051	No	No	No	No	No	Yes
27	7.1	Case	1	No	30-39	sep2020	oct2020	203	204	1	F	African	No	Asymptomatic	1	POSITIVE	57	jun2015													No	Yes	Detected	24.97	19	380	0.05	2.38	0.26	0.58	4.10345	No	27.0051	No	No	No	No	No	Yes
28	1	Case	1	No	70-79	oct2020	oct2020	5	29	24	M	African		Mild	3	NEGATIVE			No	0	0	0	0	0	0	0	0	0	0	0	No	No	Inconclusive	N/A	411	358	1.14804	11.21	0.7	0.81	13.8395	No	18.6851	No	No	No	No	No	No
29	1	Case	2	No	50-59	jan2021	jan2021	5	15	10	F	African	No	Supplemental Oxygen or Death	4	POSITIVE	40	jan2008													No	Yes	Detected	31.62								No		No	Yes	No	No	No	No
29	2	Case	2	Yes	50-59	jan2021	jan2021	19	29	10	F	African	No	Mild	2	POSITIVE		jan2008													No	Yes										No		No	Yes	No	No	No	No
29	4	Case	2	Yes	50-59	jan2021	jan2021	26	36	10	F	African	No	Asymptomatic	1	POSITIVE		jan2008													No	Yes										No		No	Yes	No	No	No	No
30	1	Case	2	No	40-49	jan2021	jan2021	2	9	7	F	African	No	Supplemental Oxygen or Death	4	POSITIVE	40		Yes	0	0	0	<180	0	0	0	0	0	0	0	No	Yes	2Targets	>35.84	230	298	0.771812	4.97	0.49	1.06	4.68868	No		No	No	No	No	No	No
30	3	Case	2	Yes	40-49	jan2021	jan2021	15	22	7	F	African	No	Mild	2	POSITIVE															No	Yes										No		No	No	No	No	No	No
30	4	Case	2	No	40-49	jan2021	jan2021	23	30	7	F	African	No	Mild	2	POSITIVE	40		Yes	0	0	0	1400	0	0	0	<180	0	0	0	No	Yes	Not Detected	N/A	554	628	0.882166	3.72	0.38	1.97	1.88832	No		No	No	No	No	No	No
31	1	Case	2	No	40-49	dec2020	jan2021	11	13	2	F	African	No	Supplemental Oxygen or Death	4	NEGATIVE															No	No	Detected	35.26333333	298	171	1.74269	11.5	0.61	1.01	11.3861	No		No	No	No	No	No	No
31	2	Case	2	Yes	40-49	dec2020	jan2021	18	20	2	F	African	No	Mild	2	NEGATIVE															No	No										No		No	No	No	No	No	No
31	3	Case	2	No	40-49	dec2020	jan2021	25	27	2	F	African	No	Mild	2	NEGATIVE			No	0	0	0	0	0	0	0	0	0	0	0	No	No	Not Detected	N/A	1481	791	1.87231	5.8	0.95	3.97	1.46096	No		No	No	No	No	No	No
31	4	Case	2	No	40-49	dec2020	jan2021	32	34	2	F	African	No	Mild	2	NEGATIVE															No	No	Not Detected	N/A	1198	672	1.78274	7.78	0.96	3.02	2.57616	No		No	No	No	No	No	No
31	5	Case	2	No	40-49	dec2020	jan2021	39	41	2	F	African	No	Mild	2	NEGATIVE															No	No	Not Detected	N/A	887	558	1.58961	3.93	0.53	2.42	1.62397	No		No	No	No	No	No	No
31	6	Case	2	No	40-49	dec2020	jan2021	102	104	2	F	African	No	Mild	2	NEGATIVE															No	No			1036	718	1.4429	2.92	0.51	2.53	1.15415	No		No	No	No	No	No	No
32	1	Case	2	No	40-49	dec2020	jan2021	8	12	4	M	African		Supplemental Oxygen or Death	4	POSITIVE	40	jan2002	Yes	0	66.99	1010	0	0	0	0	0	0	0	0	No	No	Detected	31.20333333	316	385	0.820779	4.93	0.4	1.42	3.47183	Yes		No	No	No	No	No	No
32	2	Case	2	Yes	40-49	dec2020	jan2021	15	19	4	M	African		Asymptomatic	1	POSITIVE		jan2002													No	No										Yes		No	No	No	No	No	No
32	3	Case	2	Yes	40-49	dec2020	jan2021	21	25	4	M	African		Asymptomatic	1	POSITIVE		jan2002													No	No										Yes		No	No	No	No	No	No
32	4	Case	2	Yes	40-49	dec2020	jan2021	28	32	4	M	African		Asymptomatic	1	POSITIVE		jan2002													No	No										Yes		No	No	No	No	No	No
32	5	Case	2	No	40-49	dec2020	jan2021	39	43	4	M	African		Asymptomatic	1	POSITIVE	40	jan2002	Yes	0	135	2026.62	0	0	0	0	0	0	0	0	No	No	Inconclusive	N/A	502	415	1.20964	1.36	0.31	1.46	0.931507	Yes		No	No	No	No	No	No
33	1	Case	2	No	50-59	jan2021	jan2021	6	14	8	M	African		Mild	3	NEGATIVE															No	No	Detected	32.47666667								No		Yes	Yes	No	No	No	No
33	2	Case	2	No	50-59	jan2021	jan2021	13	21	8	M	African		Asymptomatic	1	NEGATIVE															No	No	Inconclusive	N/A	731	491	1.4888	6.49	0.68	1.79	3.6257	No		Yes	Yes	No	No	No	No
33	3	Case	2	No	50-59	jan2021	jan2021	20	28	8	M	African		Mild	2	NEGATIVE															No	No	Not Detected	N/A	850	855	0.994152	4.22	0.63	2.66	1.58647	No		Yes	Yes	No	No	No	No
33	4	Case	2	No	50-59	jan2021	jan2021	27	35	8	M	African		Mild	2	NEGATIVE															No	No	Not Detected	N/A	590	449	1.31403	4.76	0.75	1.35	3.52593	No		Yes	Yes	No	No	No	No
33	5	Case	2	No	50-59	jan2021	jan2021	34	42	8	M	African		Asymptomatic	1	NEGATIVE															No	No	2Targets	>36.665	536	459	1.16776	4.22	0.44	1.34	3.14925	No		Yes	Yes	No	No	No	No
33	6	Case	2	No	50-59	jan2021	jan2021	97	105	8	M	African		Asymptomatic	1	NEGATIVE															No	No	Not Detected	N/A	972	1179	0.824427	3.28	0.43	2.78	1.17986	No		Yes	Yes	No	No	No	No
34	1	Case	2	No	30-39	jan2021	jan2021	6	11	5	F	African	Unknown	Supplemental Oxygen or Death	4	NEGATIVE			No	0	0	0	0	0	0	0	0	0	0	0	No	No	Not Detected	N/A	908	447	2.03132	3.87	0.35	2.47	1.5668	No	47.6108	No	No	No	No	No	No
34	2	Case	2	Yes	30-39	jan2021	jan2021	12	17	5	F	African	Unknown	Mild	3	NEGATIVE															No	No										No	47.6108	No	No	No	No	No	No
34	3	Case	2	No	30-39	jan2021	jan2021	17	22	5	F	African	Unknown	Asymptomatic	1	NEGATIVE															No	No	Not Detected	N/A	819	441	1.85714	2.93	0.47	2.05	1.42927	No	47.6108	No	No	No	No	No	No
34	4	Case	2	No	30-39	jan2021	jan2021	27	32	5	F	African	No	Mild	2	NEGATIVE															No	No	Not Detected	N/A	656	384	1.70833	3.11	0.28	1.55	2.00645	No	47.6108	No	No	No	No	No	No
34	5	Case	2	No	30-39	jan2021	jan2021	34	39	5	F	African	No	Mild	2	NEGATIVE															No	No	Not Detected	N/A	939	458	2.05022	4.1	0.4	2.04	2.0098	No	47.6108	No	No	No	No	No	No
34	6	Case	2	No	30-39	jan2021	jan2021	97	102	5	F	African	No	Asymptomatic	1	NEGATIVE															No	No	Not Detected	N/A	913	463	1.97192	3.87	0.5	2.4	1.6125	No	47.6108	No	No	No	No	No	No
35	1	Case	2	No	50-59	jan2021	jan2021	3	9	6	F	African	No	Supplemental Oxygen or Death	4	POSITIVE	40	apr2008	Yes	0	<20	931	0	0	0	0	0	0	0	0	No	No	Not Detected	N/A	191	216	0.884259	4.81	0.19	0.71	6.77465	No	38.9739	No	Yes	No	No	No	Yes
35	2	Case	2	Yes	50-59	jan2021	jan2021	10	16	6	F	African	No	Mild	2	POSITIVE		apr2008													No	No										No	38.9739	No	Yes	No	No	No	Yes
35	3	Case	2	Yes	50-59	jan2021	jan2021	17	23	6	F	African	No	Asymptomatic	1	POSITIVE		apr2008													No	No										No	38.9739	No	Yes	No	No	No	Yes
35	5	Case	2	No	50-59	jan2021	jan2021	33	39	6	F	African	No	Mild	2	POSITIVE	40	apr2008	Yes	0	35.9	901.62	0	0	0	0	0	0	0	0	No	No	Not Detected	N/A	486	637	0.762951	3.34	0.51	1.65	2.02424	No	38.9739	No	Yes	No	No	No	Yes
35	6	Case	2	No	50-59	jan2021	jan2021	97	103	6	F	African	No	Asymptomatic	1	POSITIVE	40	apr2008													No	No	Not Detected	N/A	357	490	0.728571	2.98	0.33	1.19	2.5042	No	38.9739	No	Yes	No	No	No	Yes
36	1	Case	2	No	40-49	dec2020	jan2021	16	18	2	M	White		Mild	2	NEGATIVE			No	0	0	0	0	0	0	0	0	0	0	0	No	No	Detected	31.97				3.87	0.49	2.25	1.72	No	25.5036	No	No	No	No	No	No
36	2	Case	2	No	40-49	dec2020	jan2021	22	24	2	M	White		Mild	2	NEGATIVE															No	No	Detected	35.02333333	765	1570	0.487261	3.5	0.53	2.68	1.30597	No	25.5036	No	No	No	No	No	No
36	3	Case	2	No	40-49	dec2020	jan2021	29	31	2	M	White		Mild	2	NEGATIVE															No	No	Not Detected	N/A	610	1167	0.522708	3.22	0.51	2.22	1.45045	No	25.5036	No	No	No	No	No	No
36	4	Case	2	No	40-49	dec2020	jan2021	38	40	2	M	White		Mild	2	NEGATIVE															No	No	Not Detected	N/A	666	1309	0.508785	4.36	0.45	2.43	1.79424	No	25.5036	No	No	No	No	No	No
36	5	Case	2	No	40-49	dec2020	jan2021	44	46	2	M	White		Mild	2	NEGATIVE															No	No	Not Detected	N/A	596	1108	0.537906	2.83	0.46	2.05	1.38049	No	25.5036	No	No	No	No	No	No
36	5.1	Case	2	No	40-49	dec2020	jan2021	78	80	2	M	White		Mild	2	NEGATIVE															No	No	Inconclusive	N/A	635	1357	0.467944	3.19	0.45	2.31	1.38095	No	25.5036	No	No	No	No	No	No
36	6	Case	2	No	40-49	dec2020	jan2021	112	114	2	M	White		Asymptomatic	1	NEGATIVE															No	No	Not Detected	N/A	655	1427	0.459005	2.84	0.45	2.22	1.27928	No	25.5036	No	No	No	No	No	No
37	1	Case	2	No	40-49	dec2020	jan2021	14	16	2	F	White	No	Mild	2	NEGATIVE			No	0	0	0	0	0	0	0	0	0	0	0	No	No	Detected	34.45666667				4.4	0.59	2.85	1.54386	No	17.5556	No	No	No	No	No	No
37	2	Case	2	No	40-49	dec2020	jan2021	20	22	2	F	White	No	Asymptomatic	1	NEGATIVE															No	No	2Targets	>36.805	1071	350	3.06	4.1	0.49	2.03	2.0197	No	17.5556	No	No	No	No	No	No
37	3	Case	2	No	40-49	dec2020	jan2021	27	29	2	F	White	No	Asymptomatic	1	NEGATIVE															No	No	Detected	31.52333333	506	844	0.599526	1.13	0.34	1.9	0.594737	No	17.5556	No	No	No	No	No	No
37	4	Case	2	No	40-49	dec2020	jan2021	34	36	2	F	White	No	Asymptomatic	1	NEGATIVE															No	No	Detected	34.79	1079	333	3.24024	2.74	0.4	2.09	1.311	No	17.5556	No	No	No	No	No	No
37	5	Case	2	No	40-49	dec2020	jan2021	42	44	2	F	White	No	Asymptomatic	1	NEGATIVE															No	No	Inconclusive	N/A	1171	349	3.3553	3.71	0.36	2.01	1.84577	No	17.5556	No	No	No	No	No	No
37	6	Case	2	No	40-49	dec2020	jan2021	110	112	2	F	White	No	Asymptomatic	1	NEGATIVE															No	No	Not Detected	N/A	1076	366	2.93989	4.77	0.28	2.08	2.29327	No	17.5556	No	No	No	No	No	No
38	1	Case	2	No	40-49	dec2020	jan2021	14	19	5	M	White		Mild	2	NEGATIVE			No	0	0	0	0	0	0	0	0	0	0	0	No	No	2Targets	>37.09				3.31	0.5	1.62	2.04321	No	24.5351	No	Unknown	No	No	No	No
38	2	Case	2	No	40-49	dec2020	jan2021	20	25	5	M	White		Asymptomatic	1	NEGATIVE															No	No	Inconclusive	N/A	733	481	1.52391	3.54	0.51	1.69	2.09467	No	24.5351	No	Unknown	No	No	No	No
38	3	Case	2	No	40-49	dec2020	jan2021	27	32	5	M	White		Asymptomatic	1	NEGATIVE															No	No	Not Detected	N/A				2.95	0.49	1.64	1.79878	No	24.5351	No	Unknown	No	No	No	No
38	4	Case	2	No	40-49	dec2020	jan2021	34	39	5	M	White		Asymptomatic	1	NEGATIVE															No	No	Not Detected	N/A	676	414	1.63285	2.73	0.48	1.58	1.72785	No	24.5351	No	Unknown	No	No	No	No
38	5	Case	2	No	40-49	dec2020	jan2021	42	47	5	M	White		Mild	2	NEGATIVE															No	No	Not Detected	N/A	681	438	1.55479	3.5	0.45	1.49	2.34899	No	24.5351	No	Unknown	No	No	No	No
38	6	Case	2	No	40-49	dec2020	jan2021	110	115	5	M	White		Asymptomatic	1	NEGATIVE															No	No	Not Detected	N/A	892	550	1.62182	3.64	0.54	1.89	1.92593	No	24.5351	No	Unknown	No	No	No	No
39	1	Case	2	No	20-29	jan2021	jan2021	4	9	5	M	African		Mild	3	POSITIVE	40		No	0	0	0	0	0	0	0	0	0	0	0	No	No	Not Detected	N/A				4.59	0.78	1.52	3.01974	Yes	23.5883	No	No	No	No	No	No
40	1	Case	2	No	50-59	jan2021	jan2021	6	8	2	F	African	No	Mild	3	NEGATIVE			No	0	0	0	0	0	0	0	0	0	0	0	No	No	Not Detected	N/A				4.53	0.49	2.41	1.87967	No	35.5999	Yes	No	No	No	No	No
40	2	Case	2	No	50-59	jan2021	jan2021	13	15	2	F	African	No	Mild	2	NEGATIVE															No	No	Not Detected	N/A	1121	1324	0.846677	5.53	0.52	3.01	1.83721	No	35.5999	Yes	No	No	No	No	No
40	3	Case	2	No	50-59	jan2021	jan2021	21	23	2	F	African	No	Mild	2	NEGATIVE															No	No	Not Detected	N/A	861	1195	0.720502	4.18	0.37	2.81	1.48754	No	35.5999	Yes	No	No	No	No	No
40	4	Case	2	No	50-59	jan2021	jan2021	28	30	2	F	African	No	Mild	2	NEGATIVE															No	No	Not Detected	N/A	937	1352	0.693047	3.66	0.34	2.76	1.32609	No	35.5999	Yes	No	No	No	No	No
40	5	Case	2	No	50-59	jan2021	jan2021	35	37	2	F	African	No	Mild	2	NEGATIVE															No	No	Not Detected	N/A	1058	1713	0.61763	4.21	0.44	3.42	1.23099	No	35.5999	Yes	No	No	No	No	No
41	1	Case	2	No	50-59	jan2021	jan2021	2	9	7	F	African	No	Mild	3	NEGATIVE			No	0	0	0	0	0	0	0	0	0	0	0	No	No	Not Detected	N/A				7.7	0.17	0.77	10	No	36.738	Yes	Yes	No	No	No	No
41	2	Case	2	No	50-59	jan2021	jan2021	9	16	7	F	African	No	Mild	3	NEGATIVE															No	No	Detected	26.16333333	1391	697	1.9957	3.78	0.37	2.72	1.38971	No	36.738	Yes	Yes	No	No	No	No
41	3	Case	2	No	50-59	jan2021	jan2021	16	23	7	F	African	No	Mild	2	NEGATIVE															No	No	Inconclusive	N/A	1035	580	1.78448	3.64	0.34	2.16	1.68519	No	36.738	Yes	Yes	No	No	No	No
41	4	Case	2	No	50-59	jan2021	jan2021	23	30	7	F	African	No	Mild	2	NEGATIVE															No	No	2Targets	>37.875	1082	592	1.8277	2.21	0.31	2.08	1.0625	No	36.738	Yes	Yes	No	No	No	No
41	5	Case	2	No	50-59	jan2021	jan2021	30	37	7	F	African	No	Mild	2	NEGATIVE															No	No	Detected	34.3266666666667	1103	711	1.55134	2.2	0.35	2.17	1.01382	No	36.738	Yes	Yes	No	No	No	No
42	1	Case	2	No	50-59	jan2021	jan2021	17			F	African	No	Supplemental Oxygen or Death	4	POSITIVE	40		Yes	0	0	748	0	0	0	0	0	0	0	0	No	No	Not Detected	N/A	713	527	1.35294	2.37	0.75	1.69	1.40237	No	45.1172	Yes	Yes	No	No	No	No
42	2	Case	2	No	50-59	jan2021	jan2021	24			F	African	No	Supplemental Oxygen or Death	4	POSITIVE	40		Yes	0	0	550.62	0	0	0	0	0	0	0	0	No	No	Not Detected	N/A	929	952	0.97584	2.92	0.95	2.65	1.10189	No	45.1172	Yes	Yes	No	No	No	No
42	3	Case	2	Yes	50-59	jan2021	jan2021	30			F	African	No	Mild	2	POSITIVE															No	No										No	45.1172	Yes	Yes	No	No	No	No
42	4	Case	2	No	50-59	jan2021	jan2021	38			F	African	No	Mild	2	POSITIVE	40		Yes	0	<20	1573.7	0	0	0	0	0	0	0	0	No	No	Not Detected	N/A	990	2036	0.486248	2.95	1.01	4.09	0.721271	No	45.1172	Yes	Yes	No	No	No	No
42	5	Case	2	No	50-59	jan2021	jan2021	45			F	African	No	Mild	2	POSITIVE	40		Yes	0	<20	2423.7	0	0	0	0	0	0	0	0	No	No	Not Detected	N/A	714	1337	0.534031	2.68	0.74	2.89	0.927336	No	45.1172	Yes	Yes	No	No	No	No
43	1	Case	2	No	40-49	jan2021	jan2021	4	15	11	F	African	No	Supplemental Oxygen or Death	4	POSITIVE	40	jan2010	Yes	0	0	<150	343.8	0	0	0	<180	0	0	0	No	Yes	Detected	27.07333333	443	432	1.02546	4.62	0.99	1.35	3.42222	No	38.9739	No	No	No	No	No	No
43	2	Case	2	No	40-49	jan2021	jan2021	11	22	11	F	African	No	Mild	3	POSITIVE	40	jan2010	Yes	0	0	0	302	0	0	0	180.4	0	0	0	No	Yes	Detected	36.65666667	333	521	0.639155	7.32	0.28	1.5	4.88	No	38.9739	No	No	No	No	No	No
43	3	Case	2	No	40-49	jan2021	jan2021	18	29	11	F	African	No	Mild	3	POSITIVE	40	jan2010	Yes	0	317	846.62	0	0	0	0	<180	0	0	0	No	Yes	Not Detected	N/A	1354	1320	1.02576	7.72	0.52	3.48	2.21839	No	38.9739	No	No	No	No	No	No
43	4	Case	2	No	40-49	jan2021	jan2021	26	37	11	F	African	No	Mild	2	POSITIVE	40	jan2010	Yes	<90	179.5	2953.7	0	0	0	0	0	0	0	0	No	Yes	Not Detected	N/A	732	836	0.875598	3.09	0.51	1.9	1.62632	No	38.9739	No	No	No	No	No	No
43	5	Case	2	No	40-49	jan2021	jan2021	32	43	11	F	African	No	Mild	2	POSITIVE	40	jan2010	Yes	<90	0	2693.7	246.9	0	0	0	<180	0	0	0	No	Yes	Inconclusive	N/A	1010	1151	0.877498	4.01	0.47	2.56	1.56641	No	38.9739	No	No	No	No	No	No
44	1	Case	2	No	<20	jan2021	jan2021	3			F	African	No	Mild	3	NEGATIVE			No	0	0	0	0	0	0	0	0	0	0	0	No	No	Not Detected	N/A	833	744	1.11962	3.09	1.06	2.05	1.50732	No	23.3091	No	No	No	No	No	No
44	2	Case	2	No	<20	jan2021	jan2021	10			F	African	No	Mild	3	NEGATIVE															No	No	Not Detected	N/A	886	742	1.19407	4.83	1.18	2.4	2.0125	No	23.3091	No	No	No	No	No	No
44	3	Case	2	Yes	<20	jan2021	jan2021	16			F	African	No	Asymptomatic	1	NEGATIVE															No	No										No	23.3091	No	No	No	No	No	No
44	5	Case	2	No	<20	jan2021	jan2021	32			F	African	No	Asymptomatic	1	NEGATIVE															No	No	Inconclusive	N/A	970	874	1.10984	4.35	0.9	2.18	1.99541	No	23.3091	No	No	No	No	No	No
45	1	Case	2	No	30-39	jan2021	jan2021	2	3	1	F	African	No	Supplemental Oxygen or Death	4	POSITIVE	157	jan2008	No	0	0	0	0	0	0	0	0	0	0	0	No	No	Not Detected	N/A	408	577	0.707106	5.06	0.82	1.21	4.18182	No	35.2617	No	No	No	No	No	No
45	2	Case	2	No	30-39	jan2021	jan2021	9	10	1	F	African	No	Supplemental Oxygen or Death	4	POSITIVE	365	jan2008	No	0	0	0	0	0	0	0	0	0	0	0	No	No	Detected	33.2	408	577	0.707106	3.99	0.43	1.68	2.375	No	35.2617	No	No	No	No	No	No
45	3	Case	2	No	30-39	jan2021	jan2021	16	17	1	F	African	No	Asymptomatic	1	POSITIVE	1656	jan2008	No	0	0	0	0	0	0	0	0	0	0	0	No	No	Not Detected	N/A	758	776	0.976804	2.83	0.45	1.76	1.60795	No	35.2617	No	No	No	No	No	No
45	4	Case	2	No	30-39	jan2021	jan2021	23	24	1	F	African	No	Asymptomatic	1	POSITIVE	1166	jan2008	Yes	<90	54.6	404.7	0	0	0	0	0	0	0	0	No	No	Not Detected	N/A	690	758	0.91029	3.47	0.51	1.7	2.04118	No	35.2617	No	No	No	No	No	No
45	5	Case	2	No	30-39	jan2021	jan2021	30	31	1	F	African	No	Asymptomatic	1	POSITIVE	46	jan2008	Yes	<90	58.2	1183.7	0	0	0	0	0	0	0	0	No	No	Not Detected	N/A	711	772	0.920984	3.83	0.39	1.54	2.48701	No	35.2617	No	No	No	No	No	No
46	1	Case	2	No	60-69	jan2021	jan2021	3	19	16	M	White		Supplemental Oxygen or Death	4	NEGATIVE			No	0	0	0	0	0	0	0	0	0	0	0	No	No	Not Detected	N/A	340	281	1.20996	14.07	0.92	1.05	13.4	No	22.4996	No	No	No	No	No	No
46	2	Case	2	Yes	60-69	jan2021	jan2021	9	25	16	M	White		Mild	2	NEGATIVE															No	No										No	22.4996	No	No	No	No	No	No
46	3	Case	2	No	60-69	jan2021	jan2021	17	33	16	M	White		Mild	2	NEGATIVE															No	No	2Targets	>36.945	406	484	0.838843	6.25	0.59	1.57	3.98089	No	22.4996	No	No	No	No	No	No
46	4	Case	2	No	60-69	jan2021	jan2021	24	40	16	M	White		Mild	2	NEGATIVE															No	No	Not Detected	N/A	733	633	1.15798	3.42	0.67	1.8	1.9	No	22.4996	No	No	No	No	No	No
46	5	Case	2	No	60-69	jan2021	jan2021	31	47	16	M	White		Mild	2	NEGATIVE															No	No	Not Detected	N/A	762	728	1.0467	2.68	0.62	2.02	1.32673	No	22.4996	No	No	No	No	No	No
47	1	Case	2	No	60-69	jan2021	jan2021	8	12	4	M	African		Supplemental Oxygen or Death	4	NEGATIVE			Yes	0	181	909.62	0	0	0	0	0	0	0	0	No	No	Not Detected	N/A	96	107	0.897196	14.89	0.14	0.35	42.5429	No	24.6548	Yes	Yes	No	No	No	No
47	2	Case	2	Yes	60-69	jan2021	jan2021	16	20	4	M	African		Supplemental Oxygen or Death	8	NEGATIVE															No	No										No	24.6548	Yes	Yes	No	No	No	No
48	1	Case	2	No	60-69	jan2021	jan2021	4	4	0	M	African		Supplemental Oxygen or Death	4	POSITIVE	40	jan2010	No	0	0	0	0	0	0	0	0	0	0	0	No	No	Not Detected	N/A	153	189	0.809524	12.78	0.29	0.61	20.9508	No	34.8381	No	No	No	No	No	No
48	2	Case	2	No	60-69	jan2021	jan2021	11	11	0	M	African		Supplemental Oxygen or Death	4	POSITIVE	40	jan2010	Yes	<90	243	2256.62	0	0	0	0	0	0	0	0	No	No	Not Detected	N/A	562	601	0.935108	19.72	1.61	1.84	10.7174	No	34.8381	No	No	No	No	No	No
48	3	Case	2	No	60-69	jan2021	jan2021	18	18	0	M	African		Mild	3	POSITIVE	40	jan2010	Yes	<90	241.5	2873.7	0	0	0	0	0	0	0	0	No	No	Not Detected	N/A	430	706	0.609065	12.25	0.76	2.06	5.9466	No	34.8381	No	No	No	No	No	No
48	4	Case	2	No	60-69	jan2021	jan2021	25	25	0	M	African		Asymptomatic	1	POSITIVE	40	jan2010	Yes	<90	206.5	3163.7	0	0	0	0	0	0	0	0	No	No	Not Detected	N/A	632	990	0.638384	7.59	0.82	2.26	3.35841	No	34.8381	No	No	No	No	No	No
48	5	Case	2	No	60-69	jan2021	jan2021	33	33	0	M	African		Mild	2	POSITIVE	40	jan2010													No	No	Inconclusive	N/A	585	957	0.611285	5.26	0.67	1.95	2.69744	No	34.8381	No	No	No	No	No	No
49	1	Case	2	No	20-29	jan2021	jan2021	1	6	5	M	African		Supplemental Oxygen or Death	4	POSITIVE	40	jan2019	Yes	0	0	0	0	0	0	<180	<180	0	<180	1090	Yes	No	Not Detected	N/A	99	119	0.831933	1.63	0.19	0.27	6.03704	No	16.5289	No	No	No	No	No	No
49	2	Case	2	No	20-29	jan2021	jan2021	8	13	5	M	African		Mild	3	POSITIVE	40	jan2019													Yes	No	Not Detected	N/A								No	16.5289	No	No	No	No	No	No
49	3	Case	2	No	20-29	jan2021	jan2021	15	20	5	M	African		Supplemental Oxygen or Death	5	POSITIVE		jan2019													Yes	No	Not Detected	N/A								No	16.5289	No	No	No	No	No	No
49	4	Case	2	No	20-29	jan2021	jan2021	22	27	5	M	African		Supplemental Oxygen or Death	4	POSITIVE		jan2019													Yes	No										No	16.5289	No	No	No	No	No	No
49	5	Case	2	No	20-29	jan2021	jan2021	43	48	5	M	African		Supplemental Oxygen or Death	4	POSITIVE		jan2019													Yes	No										No	16.5289	No	No	No	No	No	No
49	6	Case	2	Yes	20-29	jan2021	jan2021	30	35	5	M	African		Supplemental Oxygen or Death	8	POSITIVE		jan2019													Yes	No										No	16.5289	No	No	No	No	No	No
50	1	Case	2	No	20-29	jan2021	jan2021	3	19	16	M	African		Supplemental Oxygen or Death	4	POSITIVE	40	apr2008	Yes	0	0	0	0	0	0	1500	361.4	0	1110	3630	Yes	Yes	Not Detected	N/A	70	69	1.01449	1.2	0.06	0.2	6	No		No	No	No	No	No	No
51	1	Case	2	No	50-59	jan2021	feb2021	13	13	0	F	Indian	No	Supplemental Oxygen or Death	4	NEGATIVE			No	0	0	0	0	0	0	0	0	0	0	0	No	No	Detected	32.38	170	79	2.1519	6.85	0.16	0.63	10.873	No	41.1184	Yes	Yes	Yes	Yes	No	No
51	2	Case	2	Yes	50-59	jan2021	feb2021	19	19	0	F	Indian	No	Asymptomatic	1	NEGATIVE															No	No										No	41.1184	Yes	Yes	Yes	Yes	No	No
51	4	Case	2	Yes	50-59	jan2021	feb2021	33	33	0	F	Indian	No	Mild	2	NEGATIVE															No	No										No	41.1184	Yes	Yes	Yes	Yes	No	No
52	1	Case	2	No	60-69	jan2021	feb2021	8	11	3	M	African		Mild	3	POSITIVE	40	feb2001	Yes	0	0	>5000	0	0	0	<180	297.4	0	0	0	No	Yes	Not Detected	N/A	733	627	1.16906	6.41	0.83	1.54	4.16234	No	17.7154	No	No	No	No	No	No
52	2	Case	2	No	60-69	jan2021	feb2021	15	18	3	M	African		Mild	3	POSITIVE	40	feb2001	Yes	0	0	>5000	0	0	0	1240	2346.4	0	0	0	No	Yes	Not Detected	N/A	294	264	1.11364	9.6	0.82	0.77	12.4675	No	17.7154	No	No	No	No	No	No
52	3	Case	2	Yes	60-69	jan2021	feb2021	21	24	3	M	African		Mild	2	POSITIVE		feb2001													No	Yes										No	17.7154	No	No	No	No	No	No
52	5	Case	2	No	60-69	jan2021	feb2021	35	38	3	M	African		Mild	2	POSITIVE	40	feb2001													No	Yes	Not Detected	N/A	547	527	1.03795	7.43	0.5	1.3	5.71538	No	17.7154	No	No	No	No	No	No
53	1	Case	2	No	40-49	jan2021	feb2021	4	10	6	M	African		Supplemental Oxygen or Death	4	POSITIVE	13876	jun2013	Yes	0	201	3016.62	0	0	0	0	0	0	0	0	Yes	Yes	Not Detected	N/A	1	58	0.0172414	4.31	0.15	0.19	22.6842	No	15.7808	No	No	No	No	No	No
53	2	Case	2	No	40-49	jan2021	feb2021	11	17	6	M	African		Supplemental Oxygen or Death	4	POSITIVE	1351	jun2013	Yes	0	0	312.7	0	0	0	0	0	0	0	0	Yes	Yes	Detected	24.78	13	164	0.0792683	1.92	0.36	0.43	4.46512	No	15.7808	No	No	No	No	No	No
53	3	Case	2	No	40-49	jan2021	feb2021	18	24	6	M	African		Mild	3	POSITIVE	6162598	jun2013	Yes	0	0	<150	0	0	0	0	0	0	0	0	Yes	Yes	2Targets	>37.735	5	222	0.0225225	1.46	0.14	0.61	2.39344	No	15.7808	No	No	No	No	No	No
53	5	Case	2	No	40-49	jan2021	feb2021	32	38	6	M	African		Mild	2	POSITIVE		jun2013													Yes	Yes	Not Detected	N/A	18	405	0.0444444	1.39	0.49	0.81	1.71605	No	15.7808	No	No	No	No	No	No
54	1	Case	2	No	30-39	feb2021	feb2021	1	4	3	M	African		Mild	3	NEGATIVE			Yes	0	47.7	0	0	0	0	0	0	0	0	0	No	No	Not Detected	N/A	600	638	0.940439	2.97	0.36	1.69	1.7574	No	26.1224	No	No	No	No	No	No
54	2	Case	2	No	30-39	feb2021	feb2021	8	11	3	M	African		Mild	3	NEGATIVE															No	No	Not Detected	N/A	920	956	0.962343	1.92	0.37	2.25	0.853333	No	26.1224	No	No	No	No	No	No
54	3	Case	2	No	30-39	feb2021	feb2021	15	18	3	M	African		Mild	2	NEGATIVE			No	0	0	0	0	0	0	0	0	0	0	0	No	No	Not Detected	N/A	927	843	1.09964	1.93	0.34	2.19	0.881279	No	26.1224	No	No	No	No	No	No
54	4	Case	2	No	30-39	feb2021	feb2021	22	25	3	M	African		Mild	2	NEGATIVE															No	No	Not Detected	N/A	220	344	0.639535	2.96	0.1	0.74	4	No	26.1224	No	No	No	No	No	No
54	5	Case	2	No	30-39	feb2021	feb2021	29	32	3	M	African		Mild	2	NEGATIVE															No	No	Not Detected	N/A	581	608	0.955592	1.21	0.24	1.53	0.79085	No	26.1224	No	No	No	No	No	No
55	1	Case	2	No	50-59	jan2021	feb2021	5			M	African		Mild	3	NEGATIVE			No	0	0	0	0	0	0	0	0	0	0	0	No	No	Not Detected	N/A	901	489	1.84254	8.07	0.71	1.84	4.38587	No	24.5089	No	Yes	No	No	Yes	Yes
55	2	Case	2	No	50-59	jan2021	feb2021	12			M	African		Mild	2	NEGATIVE															No	No	Not Detected	N/A	1043	192	5.43229	7.86	0.89	1.47	5.34694	No	24.5089	No	Yes	No	No	Yes	Yes
55	3	Case	2	No	50-59	jan2021	feb2021	19			M	African		Mild	2	NEGATIVE															No	No	Not Detected	N/A	1392	797	1.74655	6	0.8	2.4	2.5	No	24.5089	No	Yes	No	No	Yes	Yes
55	4	Case	2	No	50-59	jan2021	feb2021	26			M	African		Mild	2	NEGATIVE															No	No	Not Detected	N/A	1519	768	1.97786	6.75	0.81	2.59	2.60618	No	24.5089	No	Yes	No	No	Yes	Yes
55	5	Case	2	No	50-59	jan2021	feb2021	33			M	African		Mild	2	NEGATIVE															No	No	Not Detected	N/A	1562	701	2.22825	7	0.94	2.79	2.50896	No	24.5089	No	Yes	No	No	Yes	Yes
56	1	Case	2	No	40-49	feb2021	feb2021	4	4	0	F	African	No	Mild	3	POSITIVE	40	feb2008	Yes	0	0	1136.62	0	0	0	0	0	0	0	0	No	Yes	Not Detected	N/A	967	478	2.02301	4.99	0.72	1.8	2.77222	No	27.8876	No	No	No	No	No	No
56	2	Case	2	No	40-49	feb2021	feb2021	11	11	0	F	African	No	Mild	2	POSITIVE	40	feb2008	Yes	<90	45.1	2163.7	0	0	0	0	0	0	0	0	No	Yes	Not Detected	N/A	835	491	1.70061	4.95	0.35	1.71	2.89474	No	27.8876	No	No	No	No	No	No
56	3	Case	2	No	40-49	feb2021	feb2021	18	18	0	F	African	No	Mild	2	POSITIVE	40	feb2008	Yes	<90	74.5	2013.7	0	0	0	0	0	0	0	0	No	Yes	Not Detected	N/A	941	772	1.21891	3.14	0.42	1.96	1.60204	No	27.8876	No	No	No	No	No	No
56	4	Case	2	No	40-49	feb2021	feb2021	25	25	0	F	African	No	Asymptomatic	1	POSITIVE	40	feb2008													No	Yes	Not Detected	N/A	767	743	1.0323	3.33	0.34	1.82	1.82967	No	27.8876	No	No	No	No	No	No
56	5	Case	2	No	40-49	feb2021	feb2021	32	32	0	F	African	No	Asymptomatic	1	POSITIVE	40	feb2008													No	Yes	Not Detected	N/A	927	854	1.08548	4.06	0.38	2.41	1.68465	No	27.8876	No	No	No	No	No	No
57	1	Case	2	No	60-69	feb2021	feb2021	6	10	4	M	African		Mild	3	NEGATIVE			No	0	0	0	0	0	0	0	0	0	0	0	No	No	Not Detected	N/A	556	294	1.89116	16.93	0.45	1.63	10.3865	No	29.3724	Yes	No	No	No	No	No
58	1	Case	2	No	40-49	feb2021	feb2021	6	10	4	M	Indian		Mild	3	NEGATIVE			No	0	0	0	0	0	0	0	0	0	0	0	No	No	Not Detected	N/A	763	428	1.78271	8.84	0.75	2.24	3.94643	No	38.6259	No	No	No	No	No	No
58	2	Case	2	Yes	40-49	feb2021	feb2021	12	16	4	M	Indian		Mild	2	NEGATIVE															No	No										No	38.6259	No	No	No	No	No	No
58	3	Case	2	No	40-49	feb2021	feb2021	20	24	4	M	Indian		Mild	2	NEGATIVE															No	No	Not Detected	N/A	247	252	0.980159	8.92	0.19	0.83	10.747	No	38.6259	No	No	No	No	No	No
58	4	Case	2	No	40-49	feb2021	feb2021	27	31	4	M	Indian		Mild	2	NEGATIVE															No	No	Not Detected	N/A	786	512	1.53516	7.52	0.62	1.92	3.91667	No	38.6259	No	No	No	No	No	No
58	5	Case	2	No	40-49	feb2021	feb2021	34	38	4	M	Indian		Asymptomatic	1	NEGATIVE															No	No	Not Detected	N/A	1162	774	1.50129	6.22	0.53	2.27	2.74009	No	38.6259	No	No	No	No	No	No
59	1	Case	2	No	20-29	feb2021	feb2021	7			M	African		Mild	3	POSITIVE	28848	jun2015	Yes	0	0	0	0	0	0	0	517.1	847	<180	0	Yes	Yes	Not Detected	N/A	453	1641	0.276051	4.14	0.51	2.58	1.60465	No		No	No	No	No	No	No
59	3	Case	2	Yes	20-29	feb2021	feb2021	21			M	African		Asymptomatic	1	POSITIVE		jun2015													Yes	Yes										No		No	No	No	No	No	No
59	4	Case	2	No	20-29	feb2021	feb2021	28			M	African		Asymptomatic	1	POSITIVE	2864	jun2015													Yes	Yes	Not Detected	N/A	331	574	0.576655	2.41	0.3	1.2	2.00833	No		No	No	No	No	No	No
59	5	Case	2	No	20-29	feb2021	feb2021	35			M	African		Asymptomatic	1	POSITIVE	2147	jun2015													Yes	Yes	Not Detected	N/A	464	1271	0.365067	3.09	0.5	2.01	1.53731	No		No	No	No	No	No	No
60	1	Case	1	No	50-59	apr2020	feb2021	315	349	34	F	African	No	Asymptomatic	1	POSITIVE	40	jan2016	Yes	<90	279.5	1043.7	0	0	0	0	0	0	0	0	Yes	Yes	Not Detected	N/A	781	767	1.01825	1.92	0.34	1.99	0.964824	No	28.3937	No	No	No	No	No	No
60	2	Case	1	No	50-59	apr2020	feb2021	322	356	34	F	African	No	Asymptomatic	1	POSITIVE	40	jan2016	Yes	<90	176.5	768.7	0	0	0	0	0	0	0	0	Yes	Yes	Not Detected	N/A	686	584	1.17466	1.36	0.35	1.6	0.85	No	28.3937	No	No	No	No	No	No
60	3	Case	1	No	50-59	apr2020	feb2021	329	363	34	F	African	No	Asymptomatic	1	POSITIVE	40	jan2016													Yes	Yes	Not Detected	N/A	1017	896	1.13504	2.39	0.48	2.21	1.08145	No	28.3937	No	No	No	No	No	No
60	4	Case	1	No	50-59	apr2020	feb2021	336	370	34	F	African	No	Asymptomatic	1	POSITIVE	40	jan2016													Yes	Yes	Not Detected	N/A	849	712	1.19242	0.83	0.32	1.69	0.491124	No	28.3937	No	No	No	No	No	No
60	5	Case	1	No	50-59	apr2020	feb2021	343	377	34	F	African	No	Asymptomatic	1	POSITIVE	40	jan2016													Yes	Yes	Not Detected	N/A	824	718	1.14763	1.09	0.36	1.76	0.619318	No	28.3937	No	No	No	No	No	No
61	1	Case	2	No	40-49	feb2021	feb2021	9	14	5	M	White		Mild	2	NEGATIVE			No	0	0	0	0	0	0	0	0	0	0	0	No	No	Detected	28.46	1542	785	1.96433	10.22	1.04	3.46	2.95376	No	36.1938	No	No	No	No	No	Yes
61	2	Case	2	Yes	40-49	feb2021	feb2021	15	20	5	M	White		Mild	2	NEGATIVE															No	No										No	36.1938	No	No	No	No	No	Yes
61	3	Case	2	No	40-49	feb2021	feb2021	23	28	5	M	White		Mild	2	NEGATIVE															No	No	Not Detected	N/A	1451	783	1.85313	3.64	0.86	2.69	1.35316	No	36.1938	No	No	No	No	No	Yes
61	4	Case	2	No	40-49	feb2021	feb2021	30	35	5	M	White		Asymptomatic	1	NEGATIVE															No	No	Not Detected	N/A	1371	794	1.7267	3.49	0.95	2.95	1.18305	No	36.1938	No	No	No	No	No	Yes
61	5	Case	2	No	40-49	feb2021	feb2021	37	42	5	M	White		Asymptomatic	1	NEGATIVE															No	No										No	36.1938	No	No	No	No	No	Yes
62	1	Case	2	No	40-49	feb2021	feb2021	8	12	4	F	White	No	Mild	2	NEGATIVE			No	0	0	0	0	0	0	0	0	0	0	0	No	No	Detected	33.12333333	583	302	1.93046	1.99	0.3	1.19	1.67227	No	28.3447	No	No	No	No	No	No
62	2	Case	2	Yes	40-49	feb2021	feb2021	14	18	4	F	White	No	Mild	2	NEGATIVE															No	No										No	28.3447	No	No	No	No	No	No
62	3	Case	2	No	40-49	feb2021	feb2021	22	26	4	F	White	No	Asymptomatic	1	NEGATIVE															No	No	2Targets	>36.905	572	322	1.7764	3.67	0.34	1.12	3.27679	No	28.3447	No	No	No	No	No	No
62	4	Case	2	No	40-49	feb2021	feb2021	29	33	4	F	White	No	Asymptomatic	1	NEGATIVE															No	No	Detected	35.21333333333333	566	297	1.90572	2.66	0.37	1.22	2.18033	No	28.3447	No	No	No	No	No	No
62	5	Case	2	No	40-49	feb2021	feb2021	36	40	4	F	White	No	Asymptomatic	1	NEGATIVE															No	No										No	28.3447	No	No	No	No	No	No
63	1	Case	2	No	50-59	feb2021	feb2021	15	15	0	M	African		Supplemental Oxygen or Death	8	POSITIVE	40	apr2010	Yes	<90	0	0	0	0	0	0	<180	0	0	0	No	Yes	Detected	28.91	141	698	0.202006	20.44	1.62	0.91	22.4615	No		No	No	No	Yes	Yes	No
64	1	Case	1	No	50-59	jul2020	feb2021	220			F	African	No	Asymptomatic	1	NEGATIVE			No	0	0	0	0	0	0	0	0	0	0	0	No	No	Not Detected	N/A	822	519	1.58381	2.95	0.44	1.6	1.84375	No	42.872	No	Yes	No	No	No	Yes
64	2	Case	1	Yes	50-59	jul2020	feb2021	227			F	African	No	Asymptomatic	1	NEGATIVE															No	No										No	42.872	No	Yes	No	No	No	Yes
64	3	Case	1	No	50-59	jul2020	feb2021	232			F	African	No	Mild	2	NEGATIVE															No	No	Not Detected	N/A	821	631	1.30111	3.29	0.47	1.82	1.80769	No	42.872	No	Yes	No	No	No	Yes
64	4	Case	1	Yes	50-59	jul2020	feb2021	240			F	African	No	Mild	2	NEGATIVE															No	No										No	42.872	No	Yes	No	No	No	Yes
64	5	Case	1	No	50-59	jul2020	feb2021	248			F	African	No	Asymptomatic	1	NEGATIVE															No	No	Not Detected	N/A	914	602	1.51827	2.99	0.39	1.87	1.59893	No	42.872	No	Yes	No	No	No	Yes
65	1	Case	1	No	50-59	jul2020	feb2021	207			F	African	No	Asymptomatic	1	NEGATIVE			No	0	0	0	0	0	0	0	0	0	0	0	No	No	Not Detected	N/A	952	1037	0.918033	3.55	0.47	2.43	1.46091	No	29.7578	No	No	No	No	No	No
65	2	Case	1	No	50-59	jul2020	feb2021	214			F	African	No	Asymptomatic	1	NEGATIVE															No	No	Not Detected	N/A	788	928	0.849138	3.28	0.57	2.22	1.47748	No	29.7578	No	No	No	No	No	No
65	3	Case	1	No	50-59	jul2020	feb2021	221			F	African	No	Asymptomatic	1	NEGATIVE															No	No	Not Detected	N/A	849	831	1.02166	3.35	0.44	2.25	1.48889	No	29.7578	No	No	No	No	No	No
65	5	Case	1	No	50-59	jul2020	feb2021	235			F	African	No	Asymptomatic	1	NEGATIVE															No	No	Not Detected	N/A	804	918	0.875817	3.44	0.5	2.06	1.6699	No	29.7578	No	No	No	No	No	No
66	1	Case	2	No	40-49	dec2020	feb2021	64	64	0	F	Indian	No	Asymptomatic	1	NEGATIVE															No	No	Not Detected	N/A	2062	1096	1.88139	9.15	0.93	4.27	2.14286	No	45.4467	No	No	No	No	No	No
66	2	Case	2	No	40-49	dec2020	feb2021	72	72	0	F	Indian	No	Asymptomatic	1	NEGATIVE															No	No	Not Detected	N/A	1818	1032	1.76163	7.51	0.73	3.9	1.92564	No	45.4467	No	No	No	No	No	No
66	4	Case	2	No	40-49	dec2020	feb2021	85	85	0	F	Indian	No	Asymptomatic	1	NEGATIVE															No	No	Not Detected	N/A	1778	1034	1.71954	7.3	0.81	4.01	1.82045	No	45.4467	No	No	No	No	No	No
67	1	Case	2	No	50-59	dec2020	feb2021	41			F	African	No	Asymptomatic	1	NEGATIVE															No	No	Not Detected	N/A	1443	669	2.15695	4.06	0.4	2.36	1.72034	No	41.5332	Yes	Yes	No	No	No	No
67	2	Case	2	No	50-59	dec2020	feb2021	48			F	African	No	Asymptomatic	1	NEGATIVE															No	No	Not Detected	N/A	1666	793	2.10088	3.97	0.45	2.85	1.39298	No	41.5332	Yes	Yes	No	No	No	No
67	3	Case	2	No	50-59	dec2020	feb2021	55			F	African	No	Mild	3	NEGATIVE															No	No	Not Detected	N/A	1453	693	2.09668	3.32	0.4	2.31	1.43723	No	41.5332	Yes	Yes	No	No	No	No
67	4	Case	2	No	50-59	dec2020	feb2021	62			F	African	No	Asymptomatic	1	NEGATIVE															No	No	Not Detected	N/A	1423	735	1.93605	4.6	0.36	2.59	1.77606	No	41.5332	Yes	Yes	No	No	No	No
67	5	Case	2	No	50-59	dec2020	feb2021	69			F	African	No	Asymptomatic	1	NEGATIVE															No	No	Not Detected	N/A	1692	862	1.96288	3.47	0.43	2.7	1.28519	No	41.5332	Yes	Yes	No	No	No	No
68	1	Case	2	No	40-49	jan2021	feb2021	25			F	African	No	Mild	2	NEGATIVE															No	No	Detected	32.31	839	574	1.46167	3.47	0.68	1.94	1.78866	No	48.4246	No	No	No	No	No	No
68	2	Case	2	No	40-49	jan2021	feb2021	32			F	African	No	Mild	2	NEGATIVE															No	No	Not Detected	N/A	741	540	1.37222	4.04	0.7	1.64	2.46341	No	48.4246	No	No	No	No	No	No
68	3	Case	2	No	40-49	jan2021	feb2021	39			F	African	No	Asymptomatic	1	NEGATIVE															No	No	Detected	35.04666666666667	780	569	1.37083	2.67	0.53	1.78	1.5	No	48.4246	No	No	No	No	No	No
68	4	Case	2	No	40-49	jan2021	feb2021	46			F	African	No	Asymptomatic	1	NEGATIVE															No	No	Not Detected	N/A	656	492	1.33333	3.55	0.62	1.74	2.04023	No	48.4246	No	No	No	No	No	No
68	5	Case	2	No	40-49	jan2021	feb2021	53			F	African	No	Asymptomatic	1	NEGATIVE															No	No	Not Detected	N/A	770	597	1.28978	2.61	0.61	1.79	1.4581	No	48.4246	No	No	No	No	No	No
69	1	Case	1	No	30-39	jul2020	feb2021	218			F	African	No	Asymptomatic	1	NEGATIVE															No	No	Not Detected	N/A	1975	1330	1.48496	3.52	0.56	4.25	0.828235	No	32.831	No	No	No	No	No	No
69	2	Case	1	No	30-39	jul2020	feb2021	225			F	African	No	Asymptomatic	1	NEGATIVE															No	No	Not Detected	N/A	1345	829	1.62244	3.05	0.37	2.89	1.05536	No	32.831	No	No	No	No	No	No
69	3	Case	1	No	30-39	jul2020	feb2021	232			F	African	No	Asymptomatic	1	NEGATIVE															No	No	Not Detected	N/A	1669	1010	1.65248	2.86	0.48	3.29	0.869301	No	32.831	No	No	No	No	No	No
69	4	Case	1	No	30-39	jul2020	feb2021	239			F	African	No	Asymptomatic	1	NEGATIVE															No	No	Not Detected	N/A	1668	1055	1.58104	3.89	0.5	3.59	1.08357	No	32.831	No	No	No	No	No	No
69	5	Case	1	No	30-39	jul2020	feb2021	249			F	African	No	Asymptomatic	1	NEGATIVE															No	No	Not Detected	N/A	1153	775	1.48774	3.79	0.37	2.52	1.50397	No	32.831	No	No	No	No	No	No
70	1	Case	1	No	50-59	aug2020	feb2021	205			M	African		Asymptomatic	1	POSITIVE	40														No	No	Not Detected	N/A	670	666	1.00601	2.54	0.37	1.8	1.41111	Yes	24.7676	No	No	No	No	No	Yes
70	2	Case	1	No	50-59	aug2020	feb2021	212			M	African		Asymptomatic	1	POSITIVE	40														No	No	Not Detected	N/A	580	644	0.900621	2.19	0.32	1.9	1.15263	Yes	24.7676	No	No	No	No	No	Yes
70	3	Case	1	No	50-59	aug2020	feb2021	219			M	African		Asymptomatic	1	POSITIVE	40														No	No	Not Detected	N/A	829	812	1.02094	1.93	0.38	1.93	1	Yes	24.7676	No	No	No	No	No	Yes
70	4	Case	1	No	50-59	aug2020	feb2021	226			M	African		Asymptomatic	1	POSITIVE	40														No	No	Not Detected	N/A	800	684	1.16959	2.77	0.38	1.63	1.69939	Yes	24.7676	No	No	No	No	No	Yes
70	5	Case	1	No	50-59	aug2020	feb2021	236			M	African		Asymptomatic	1	POSITIVE	40														No	No	Not Detected	N/A	726	726	1	2.8	0.32	1.79	1.56425	Yes	24.7676	No	No	No	No	No	Yes
71	1	Case	1	No	50-59	jul2020	feb2021	220			F	African	No	Asymptomatic	1	NEGATIVE															No	No	Not Detected	N/A	2307	963	2.39564	3.07	0.39	3.6	0.852778	No	33.5938	No	No	No	No	No	No
71	2	Case	1	No	50-59	jul2020	feb2021	227			F	African	No	Asymptomatic	1	NEGATIVE															No	No	Not Detected	N/A	1515	707	2.14286	2.26	0.3	2.82	0.801418	No	33.5938	No	No	No	No	No	No
71	3	Case	1	No	50-59	jul2020	feb2021	234			F	African	No	Asymptomatic	1	NEGATIVE															No	No	Not Detected	N/A	1739	826	2.10533	2.13	0.37	3.1	0.687097	No	33.5938	No	No	No	No	No	No
71	4	Case	1	No	50-59	jul2020	feb2021	241			F	African	No	Asymptomatic	1	NEGATIVE															No	No	Not Detected	N/A	2052	910	2.25495	1.91	0.34	3.53	0.541076	No	33.5938	No	No	No	No	No	No
71	5	Case	1	No	50-59	jul2020	feb2021	251			F	African	No	Asymptomatic	1	NEGATIVE															No	No	Not Detected	N/A	2165	989	2.18908	2.35	0.33	3.73	0.630027	No	33.5938	No	No	No	No	No	No
72	1	Case	2	No	60-69	dec2020	mar2021	86			F	African	No	Asymptomatic	1	NEGATIVE															No	No	Inconclusive	N/A	913	688	1.32703	3.4	0.4	2.24	1.51786	No	30.4272	No	No	No	No	No	No
72	2	Case	2	No	60-69	dec2020	mar2021	93			F	African	No	Asymptomatic	1	NEGATIVE															No	No	Not Detected	N/A	1082	658	1.64438	3.6	0.49	2.65	1.35849	No	30.4272	No	No	No	No	No	No
72	3	Case	2	No	60-69	dec2020	mar2021	100			F	African	No	Asymptomatic	1	NEGATIVE															No	No	Not Detected	N/A	911	605	1.50579	3.28	0.47	2.18	1.50459	No	30.4272	No	No	No	No	No	No
72	4	Case	2	No	60-69	dec2020	mar2021	107			F	African	No	Asymptomatic	1	NEGATIVE															No	No	Not Detected	N/A	987	700	1.41	3.3	0.45	2.82	1.17021	No	30.4272	No	No	No	No	No	No
72	5	Case	2	No	60-69	dec2020	mar2021	114			F	African	No	Asymptomatic	1	NEGATIVE															No	No	Not Detected	N/A	920	774	1.18863	2.66	0.47	2.69	0.988848	No	30.4272	No	No	No	No	No	No
73	1	Case	1	No	50-59	aug2020	mar2021	215			F	African	No	Asymptomatic	1	NEGATIVE															No	No	Not Detected	N/A	774	573	1.35079	1.92	0.16	1.49	1.28859	No	31.2452	No	No	No	No	No	No
73	2	Case	1	No	50-59	aug2020	mar2021	222			F	African	No	Asymptomatic	1	NEGATIVE															No	No	Not Detected	N/A	550	445	1.23595	1.43	0.12	1.16	1.23276	No	31.2452	No	No	No	No	No	No
73	3	Case	1	No	50-59	aug2020	mar2021	231			F	African	No	Asymptomatic	1	NEGATIVE															No	No	Not Detected	N/A	274	214	1.28037	2.46	0.2	0.52	4.73077	No	31.2452	No	No	No	No	No	No
73	4	Case	1	Yes	50-59	aug2020	mar2021	237			F	African	No	Asymptomatic	1	NEGATIVE															No	No										No	31.2452	No	No	No	No	No	No
73	5	Case	1	No	50-59	aug2020	mar2021	244			F	African	No	Asymptomatic	1	NEGATIVE															No	No	Not Detected	N/A	862	675	1.27704	4.32	0.52	1.85	2.33514	No	31.2452	No	No	No	No	No	No
74	1	Case	2	No	60-69	dec2020	mar2021	70			M	African		Asymptomatic	1	NEGATIVE															No	No	2Targets	>38.095	778	1124	0.692171	2.78	0.37	2.53	1.09881	No	34.0866	No	Yes	No	No	No	No
74	2	Case	2	No	60-69	dec2020	mar2021	77			M	African		Asymptomatic	1	NEGATIVE															No	No	Not Detected	N/A	878	1449	0.605935	2.48	0.56	2.99	0.829431	No	34.0866	No	Yes	No	No	No	No
74	3	Case	2	No	60-69	dec2020	mar2021	85			M	African		Asymptomatic	1	NEGATIVE															No	No	Not Detected	N/A	869	1327	0.654861	2.58	0.39	2.58	1	No	34.0866	No	Yes	No	No	No	No
74	4	Case	2	No	60-69	dec2020	mar2021	91			M	African		Asymptomatic	1	NEGATIVE															No	No	Not Detected	N/A	843	1334	0.631934	2.85	0.46	2.8	1.01786	No	34.0866	No	Yes	No	No	No	No
74	5	Case	2	No	60-69	dec2020	mar2021	99			M	African		Asymptomatic	1	NEGATIVE															No	No	Not Detected	N/A	773	1029	0.751215	2.78	0.32	2.37	1.173	No	34.0866	No	Yes	No	No	No	No
75	1	Case	1	No	50-59	jul2020	mar2021	248			M	Indian		Asymptomatic	1	NEGATIVE															No	No	Not Detected	N/A	2056	1914	1.07419	3.08	0.52	3.38	0.911243	No	27.1706	No	No	No	No	No	No
75	2	Case	1	No	50-59	jul2020	mar2021	255			M	Indian		Asymptomatic	1	NEGATIVE															No	No	Not Detected	N/A	2073	1402	1.4786	2.68	0.47	3.24	0.82716	No	27.1706	No	No	No	No	No	No
75	3	Case	1	No	50-59	jul2020	mar2021	262			M	Indian		Asymptomatic	1	NEGATIVE															No	No	Not Detected	N/A	1495	1416	1.05579	2.68	0.49	2.58	1.03876	No	27.1706	No	No	No	No	No	No
75	4	Case	1	No	50-59	jul2020	mar2021	269			M	Indian		Asymptomatic	1	NEGATIVE															No	No	Not Detected	N/A	2034	1883	1.08019	2.78	0.64	3.68	0.755435	No	27.1706	No	No	No	No	No	No
75	5	Case	1	No	50-59	jul2020	mar2021	277			M	Indian		Asymptomatic	1	NEGATIVE															No	No	Not Detected	N/A	2383	1629	1.46286	3.11	0.67	4.28	0.726636	No	27.1706	No	No	No	No	No	No
76	1	Case	1	No	30-39	jun2020	mar2021	276			M	African		Asymptomatic	1	NEGATIVE															No	No	Not Detected	N/A	1396	1233	1.1322	1.76	0.45	3.47	0.507205	No	29.4118	No	No	No	No	No	No
76	2	Case	1	No	30-39	jun2020	mar2021	283			M	African		Asymptomatic	1	NEGATIVE															No	No	Not Detected	N/A	1453	1113	1.30548	2.33	0.4	3.16	0.737342	No	29.4118	No	No	No	No	No	No
76	3	Case	1	Yes	30-39	jun2020	mar2021	290			M	African		Asymptomatic	1	NEGATIVE															No	No										No	29.4118	No	No	No	No	No	No
76	4	Case	1	No	30-39	jun2020	mar2021	297			M	African		Asymptomatic	1	NEGATIVE															No	No	Not Detected	N/A	1366	827	1.65175	1.91	0.38	2.73	0.699634	No	29.4118	No	No	No	No	No	No
76	5	Case	1	No	30-39	jun2020	mar2021	304			M	African		Asymptomatic	1	NEGATIVE															No	No	Not Detected	N/A	1694	1124	1.50712	2.08	0.37	3.74	0.55615	No	29.4118	No	No	No	No	No	No
77	1	Case	1	No	50-59	jul2020	mar2021	226			F	African	No	Asymptomatic	1	NEGATIVE															No	No	Not Detected	N/A	1995	698	2.85817	3.46	0.42	3.09	1.11974	No	32.6905	No	No	No	No	No	No
77	2	Case	1	No	50-59	jul2020	mar2021	234			F	African	No	Asymptomatic	1	NEGATIVE															No	No	Not Detected	N/A	1713	603	2.8408	3.12	0.42	2.85	1.09474	No	32.6905	No	No	No	No	No	No
77	3	Case	1	No	50-59	jul2020	mar2021	240			F	African	No	Asymptomatic	1	NEGATIVE															No	No	Not Detected	N/A	1744	743	2.34724	4.06	0.45	2.75	1.47636	No	32.6905	No	No	No	No	No	No
77	4	Case	1	No	50-59	jul2020	mar2021	247			F	African	No	Asymptomatic	1	NEGATIVE															No	No	Not Detected	N/A	1528	521	2.93282	2.92	0.36	2.6	1.12308	No	32.6905	No	No	No	No	No	No
77	5	Case	1	No	50-59	jul2020	mar2021	254			F	African	No	Asymptomatic	1	NEGATIVE															No	No	Not Detected	N/A	1612	590	2.7322	2.77	0.44	2.55	1.08627	No	32.6905	No	No	No	No	No	No
78	1	Case	2	No	40-49	dec2020	mar2021	94			F	African	No	Asymptomatic	1	NEGATIVE															No	No	Not Detected	N/A	1031	404	2.55198	4.26	0.26	1.62	2.62963	No	37.5567	No	Yes	No	No	No	No
78	2	Case	2	No	40-49	dec2020	mar2021	101			F	African	No	Asymptomatic	1	NEGATIVE															No	No	Not Detected	N/A	1083	511	2.11937	5.51	0.52	2.16	2.55093	No	37.5567	No	Yes	No	No	No	No
78	3	Case	2	No	40-49	dec2020	mar2021	108			F	African	No	Asymptomatic	1	NEGATIVE															No	No	Not Detected	N/A	976	527	1.85199	5.73	0.33	1.86	3.08065	No	37.5567	No	Yes	No	No	No	No
78	4	Case	2	No	40-49	dec2020	mar2021	115			F	African	No	Asymptomatic	1	NEGATIVE															No	No	Not Detected	N/A	1059	438	2.41781	5.05	0.21	1.83	2.75956	No	37.5567	No	Yes	No	No	No	No
78	5	Case	2	No	40-49	dec2020	mar2021	122			F	African	No	Asymptomatic	1	NEGATIVE															No	No	Not Detected	N/A	1081	461	2.3449	4.84	0.37	1.96	2.46939	No	37.5567	No	Yes	No	No	No	No
79	1	Case	1	No	40-49	jul2020	mar2021	231			F	African	No	Asymptomatic	1	POSITIVE	40														No	No	Not Detected	N/A	886	1059	0.836638	3.57	0.45	2.54	1.40551	No	23.6652	No	Yes	No	No	No	Yes
79	2	Case	1	No	40-49	jul2020	mar2021	239			F	African	No	Asymptomatic	1	POSITIVE	40														No	No	Not Detected	N/A	753	757	0.994716	2.93	0.42	2.07	1.41546	No	23.6652	No	Yes	No	No	No	Yes
79	3	Case	1	No	40-49	jul2020	mar2021	245			F	African	No	Asymptomatic	1	POSITIVE	40														No	No	Not Detected	N/A	950	892	1.06502	3.69	0.34	2.44	1.5123	No	23.6652	No	Yes	No	No	No	Yes
79	4	Case	1	No	40-49	jul2020	mar2021	253			F	African	No	Asymptomatic	1	POSITIVE	40														No	No	Not Detected	N/A	879	940	0.935106	4.22	0.65	2.47	1.7085	No	23.6652	No	Yes	No	No	No	Yes
79	5	Case	1	No	40-49	jul2020	mar2021	259			F	African	No	Asymptomatic	1	POSITIVE															No	No	Not Detected	N/A	744	837	0.888889	3.47	0.41	1.97	1.76142	No	23.6652	No	Yes	No	No	No	Yes
80	1	Case	1	No	30-39	jul2020	mar2021	238			F	African	No	Asymptomatic	1	NEGATIVE															No	No	Not Detected	N/A	1292	856	1.50935	8.6	0.62	2.67	3.22097	No	31.6456	No	No	No	No	No	No
80	2	Case	1	No	30-39	jul2020	mar2021	246			F	African	No	Asymptomatic	1	NEGATIVE															No	No	Not Detected	N/A	1233	994	1.24044	5.01	0.56	2.55	1.96471	No	31.6456	No	No	No	No	No	No
80	3	Case	1	No	30-39	jul2020	mar2021	253			F	African	No	Asymptomatic	1	NEGATIVE															No	No	Not Detected	N/A	1122	795	1.41132	4.87	0.51	2.44	1.9959	No	31.6456	No	No	No	No	No	No
80	4	Case	1	No	30-39	jul2020	mar2021	262			F	African	No	Asymptomatic	1	NEGATIVE															No	No	Not Detected	N/A	1000	669	1.49477	6.92	0.44	2.02	3.42574	No	31.6456	No	No	No	No	No	No
80	5	Case	1	No	30-39	jul2020	mar2021	266			F	African	No	Asymptomatic	1	NEGATIVE															No	No	Not Detected	N/A	1054	641	1.64431	5.96	0.57	2.22	2.68468	No	31.6456	No	No	No	No	No	No
81	1	Case	2	No	40-49	dec2020	mar2021	99			F	African	No	Asymptomatic	1	NEGATIVE															No	No	Not Detected	N/A	1103	1111	0.992799	1.99	0.37	2.6	0.765385	No	34.5271	No	No	No	No	No	No
81	2	Case	2	No	40-49	dec2020	mar2021	106			F	African	No	Asymptomatic	1	NEGATIVE															No	No	Not Detected	N/A	1161	1084	1.07103	2.1	0.32	2.43	0.864198	No	34.5271	No	No	No	No	No	No
81	3	Case	2	No	40-49	dec2020	mar2021	113			F	African	No	Asymptomatic	1	NEGATIVE															No	No	Not Detected	N/A	1070	1074	0.996276	2.03	0.27	2.63	0.771863	No	34.5271	No	No	No	No	No	No
81	4	Case	2	No	40-49	dec2020	mar2021	120			F	African	No	Asymptomatic	1	NEGATIVE															No	No	Not Detected	N/A	1106	1031	1.07274	2.33	0.34	2.66	0.87594	No	34.5271	No	No	No	No	No	No
81	5	Case	2	No	40-49	dec2020	mar2021	127			F	African	No	Asymptomatic	1	NEGATIVE															No	No	Not Detected	N/A	864	843	1.02491	2.43	0.25	2.19	1.10959	No	34.5271	No	No	No	No	No	No
82	1	Case	1	No	50-59	jul2020	mar2021	243			F	African	No	Asymptomatic	1	NEGATIVE															No	No	Not Detected	N/A	1334	343	3.88921	2.57	0.43	2.71	0.948339	No	39.0368	No	Yes	No	No	No	No
82	2	Case	1	No	50-59	jul2020	mar2021	250			F	African	No	Asymptomatic	1	NEGATIVE															No	No	Not Detected	N/A	1371	350	3.91714	2.44	0.37	2.8	0.871429	No	39.0368	No	Yes	No	No	No	No
82	3	Case	1	No	50-59	jul2020	mar2021	257			F	African	No	Asymptomatic	1	NEGATIVE															No	No	Not Detected	N/A	954	241	3.95851	1.68	0.42	2.12	0.792453	No	39.0368	No	Yes	No	No	No	No
82	4	Case	1	No	50-59	jul2020	mar2021	264			F	African	No	Asymptomatic	1	NEGATIVE															No	No	Not Detected	N/A	1242	306	4.05882	2.84	0.31	2.39	1.18828	No	39.0368	No	Yes	No	No	No	No
82	5	Case	1	No	50-59	jul2020	mar2021	271			F	African	No	Asymptomatic	1	NEGATIVE															No	No	Not Detected	N/A	1131	290	3.9	2.28	0.45	2.29	0.995633	No	39.0368	No	Yes	No	No	No	No
83	1	Case	1	No	50-59	jul2020	mar2021	235			F	African	No	Asymptomatic	1	NEGATIVE															No	No	Not Detected	N/A	1098	716	1.53352	3	0.43	2.24	1.33929	No	28.9341	Yes	No	No	No	No	No
83	2	Case	1	No	50-59	jul2020	mar2021	242			F	African	No	Asymptomatic	1	NEGATIVE															No	No	Not Detected	N/A	1063	664	1.6009	2.53	0.33	2.21	1.1448	No	28.9341	Yes	No	No	No	No	No
83	3	Case	1	No	50-59	jul2020	mar2021	249			F	African	No	Asymptomatic	1	NEGATIVE															No	No	Not Detected	N/A	1047	692	1.51301	2.9	0.36	2.36	1.22881	No	28.9341	Yes	No	No	No	No	No
83	4	Case	1	No	50-59	jul2020	mar2021	256			F	African	No	Asymptomatic	1	NEGATIVE															No	No	Not Detected	N/A	1015	660	1.53788	2.45	0.3	2.23	1.09865	No	28.9341	Yes	No	No	No	No	No
83	5	Case	1	No	50-59	jul2020	mar2021	263			F	African	No	Asymptomatic	1	NEGATIVE															No	No	Not Detected	N/A	1165	737	1.58073	2.38	0.29	2.24	1.0625	No	28.9341	Yes	No	No	No	No	No
84	1	Case	2	No	40-49	dec2020	mar2021	104			F	Asian	No	Asymptomatic	1	NEGATIVE															No	No	Not Detected	N/A	1333	772	1.72668	4.33	0.37	2.4	1.80417	No	19.8347	No	No	No	No	No	No
84	2	Case	2	No	40-49	dec2020	mar2021	111			F	Asian	No	Asymptomatic	1	NEGATIVE															No	No			1174	706	1.66289	4.95	0.4	2.52	1.96429	No	19.8347	No	No	No	No	No	No
84	3	Case	2	No	40-49	dec2020	mar2021	118			F	Asian	No	Asymptomatic	1	NEGATIVE															No	No			1231	797	1.54454	3.76	0.48	2.54	1.48031	No	19.8347	No	No	No	No	No	No
84	4	Case	2	Yes	40-49	dec2020	mar2021	125			F	Asian	No	Asymptomatic	1	NEGATIVE															No	No										No	19.8347	No	No	No	No	No	No
84	5	Case	2	Yes	40-49	dec2020	mar2021	131			F	Asian	No	Asymptomatic	1	NEGATIVE															No	No										No	19.8347	No	No	No	No	No	No
85	1	Case	1	No	50-59	jul2020	mar2021	242			F	African	No	Asymptomatic	1	NEGATIVE															No	No	Not Detected	N/A	986	1200	0.821667	2.67	0.53	2.89	0.923875	No	32.3685	No	No	No	No	No	No
85	2	Case	1	No	50-59	jul2020	mar2021	276			F	African	No	Asymptomatic	1	NEGATIVE															No	No	Not Detected	N/A	978	945	1.03492	2.8	0.43	2.74	1.0219	No	32.3685	No	No	No	No	No	No
85	3	Case	1	No	50-59	jul2020	mar2021	283			F	African	No	Asymptomatic	1	NEGATIVE															No	No	Not Detected	N/A	1021	1065	0.958685	2.59	0.54	2.66	0.973684	No	32.3685	No	No	No	No	No	No
85	4	Case	1	No	50-59	jul2020	mar2021	290			F	African	No	Asymptomatic	1	NEGATIVE															No	No	Not Detected	N/A	1026	1145	0.89607	2.5	0.49	2.92	0.856164	No	32.3685	No	No	No	No	No	No
86	1	Case	2	No	20-29	dec2020	mar2021	95	97	2	F	White	No	Asymptomatic	1	NEGATIVE															No	No	Inconclusive	N/A	846	513	1.64912	4.4	0.38	1.61	2.73292	No	27.0051	No	No	No	No	No	No
86	2	Case	2	No	20-29	dec2020	mar2021	102	104	2	F	White	No	Asymptomatic	1	NEGATIVE															No	No	Not Detected	N/A	954	580	1.64483	2.65	0.25	1.88	1.40957	No	27.0051	No	No	No	No	No	No
86	3	Case	2	No	20-29	dec2020	mar2021	109	111	2	F	White	No	Asymptomatic	1	NEGATIVE															No	No	Not Detected	N/A	1046	631	1.65769	3.29	0.3	1.92	1.71354	No	27.0051	No	No	No	No	No	No
87	1	Case	1	No	40-49	jul2020	apr2021	261			M	African		Asymptomatic	1	POSITIVE	40	aug2006													No	No	Not Detected	N/A	460	576	0.798611	3.06	0.43	1.28	2.39062	No	29.3962	Yes	No	No	No	No	No
87	2	Case	1	No	40-49	jul2020	apr2021	269			M	African		Asymptomatic	1	POSITIVE	40	aug2006													No	No	Not Detected	N/A	429	550	0.78	3.24	0.34	1.24	2.6129	No	29.3962	Yes	No	No	No	No	No
87	3	Case	1	No	40-49	jul2020	apr2021	276			M	African		Asymptomatic	1	POSITIVE	40	aug2006													No	No	Not Detected	N/A	502	666	0.753754	2.62	0.34	1.51	1.7351	No	29.3962	Yes	No	No	No	No	No
88	1	PUI	1	No	70-79		oct2020		3		F	African	No	Mild	3	NEGATIVE			No	0	0	0	0	0	0	0	0	0	0	0	No	No	Detected	36.65333333333334	1068	908	1.17621	2.84	0.58	2.7	1.05185	No	36.9823	No	No	No	No	No	No
88	2	PUI	1	No	70-79		oct2020		10		F	African	No	Mild	2	NEGATIVE															No	No	Inconclusive	N/A	1306	1085	1.20369	3.18	0.63	3.39	0.938053	No	36.9823	No	No	No	No	No	No
88	3	PUI	1	No	70-79		oct2020		17		F	African	No	Mild	2	NEGATIVE															No	No	Not Detected	N/A	1410	1468	0.96049	2.37	0.6	3.71	0.638814	No	36.9823	No	No	No	No	No	No
88	4	PUI	1	No	70-79		oct2020		24		F	African	No	Mild	2	NEGATIVE															No	No	Not Detected	N/A	1176	973	1.20863	3.17	0.63	2.77	1.1444	No	36.9823	No	No	No	No	No	No
88	5	PUI	1	No	70-79		oct2020		31		F	African	No	Mild	2	NEGATIVE															No	No	Not Detected	N/A	1221	1029	1.18659	2.96	0.51	3.17	0.933754	No	36.9823	No	No	No	No	No	No
88	6	PUI	1	No	70-79		oct2020		84		F	African	No	Asymptomatic	1	NEGATIVE															No	No	Not Detected	N/A	1092	1086	1.00552	2.72	0.51	3.34	0.814371	No	36.9823	No	No	No	No	No	No
89	1	PUI	2	No	70-79		jan2021		11		F	African	No	Supplemental Oxygen or Death	4	POSITIVE	40	jan2008	Yes	<90	0	887	<180	0	0	0	223.3	0	0	0	No	No	2Targets	>37.255	504	248	2.03226	8.85	0.79	1.75	5.05714	No		Yes	Yes	Yes	No	No	No
89	2	PUI	2	Yes	70-79		jan2021		17		F	African	No	Supplemental Oxygen or Death	4	POSITIVE		jan2008													No	No										No		Yes	Yes	Yes	No	No	No
89	3	PUI	2	Yes	70-79		jan2021		24		F	African	No	Mild	2	POSITIVE		jan2008													No	No										No		Yes	Yes	Yes	No	No	No
89	5	PUI	2	No	70-79		jan2021		48		F	African	No	Mild	2	POSITIVE	40	jan2008	Yes	<90	487.5	2033.7	0	0	0	0	0	0	0	0	No	No	Not Detected	N/A	972	309	3.14563	3.46	0.6	1.99	1.73869	No		Yes	Yes	Yes	No	No	No
90	1	PUI	2	No	20-29		jan2021		6		F	African	No	Mild	3	NEGATIVE			No	0	0	0	0	0	0	0	0	0	0	0	No	No	Not Detected	N/A				10.52	0.72	1.79	5.87709	No	37.1652	No	No	No	No	No	No
90	2	PUI	2	Yes	20-29		jan2021		12		F	African	No	Mild	3	NEGATIVE															No	No										No	37.1652	No	No	No	No	No	No
90	3	PUI	2	Yes	20-29		jan2021		21		F	African	No	Asymptomatic	1	NEGATIVE															No	No										No	37.1652	No	No	No	No	No	No
90	6	PUI	2	No	20-29		jan2021		97		F	African	No	Asymptomatic	1	NEGATIVE															No	No	Not Detected	N/A	1097	717	1.52999	3.26	0.42	2.55	1.27843	No	37.1652	No	No	No	No	No	No
91	1	PUI	2	No	20-29		jan2021				F	African	No	Mild	3	POSITIVE	40	aug2021	No	0	0	0	0	0	0	0	0	0	0	0	No	No	Detected	35.19	205	237	0.864979	6.48	0.47	0.77	8.41558	No	25.6312	No	No	No	No	No	No
91	2	PUI	2	No	20-29		jan2021				F	African	No	Mild	3	POSITIVE		aug2021													No	No	Detected	34.62								No	25.6312	No	No	No	No	No	No
91	3	PUI	2	No	20-29		jan2021				F	African	No	Mild	3	POSITIVE		aug2021													No	No		.								No	25.6312	No	No	No	No	No	No
91	4	PUI	2	Yes	20-29		jan2021				F	African	No	Mild	3	POSITIVE		aug2021													No	No										No	25.6312	No	No	No	No	No	No
91	5	PUI	2	No	20-29		jan2021				F	African	No	Supplemental Oxygen or Death	4	POSITIVE		aug2021													No	No	Not Detected	N/A								No	25.6312	No	No	No	No	No	No
91	6	PUI	2	No	20-29		jan2021				F	African	No	Asymptomatic	1	POSITIVE	40	aug2021													No	No	Not Detected	N/A	686	1016	0.675197	2.04	0.45	2.18	0.93578	No	25.6312	No	No	No	No	No	No
92	1	PUI	2	No	60-69		jan2021		22		F	African	No	Mild	3	NEGATIVE			No	0	0	0	0	0	0	0	0	0	0	0	No	No	2Targets	>36.755				8.55	1.01	0.56	15.2679	No	43.2256	Yes	Yes	Yes	No	No	No
92	6	PUI	2	No	60-69		jan2021		112		F	African	No	Asymptomatic	1	NEGATIVE															No	No	Not Detected	N/A	886	977	0.906858	7.68	0.59	2.39	3.21339	No	43.2256	Yes	Yes	Yes	No	No	No
93	1	PUI	2	No	60-69		jan2021		5		M	Indian		Supplemental Oxygen or Death	5	NEGATIVE			No	0	0	0	0	0	0	0	0	0	0	0	No	No	Detected	33.06333333				16.19	0.55	0.67	24.1642	No	37.874	Yes	Yes	Yes	No	No	No
93	2	PUI	2	Yes	60-69		jan2021		6		M	Indian		Supplemental Oxygen or Death	8	NEGATIVE															No	No										No	37.874	Yes	Yes	Yes	No	No	No
94	1	PUI	2	No	40-49		jan2021		11		M	African		Mild	3	NEGATIVE			No	0	0	0	0	0	0	0	0	0	0	0	No	No	Detected	30.09333333				11.85	0.73	0.86	13.7791	No	19.487	No	No	No	No	Unknown	No
94	2	PUI	2	No	40-49		jan2021		18		M	African		Supplemental Oxygen or Death	4	NEGATIVE															No	No	Detected	36.94333333								No	19.487	No	No	No	No	Unknown	No
94	4	PUI	2	No	40-49		jan2021		32		M	African		Supplemental Oxygen or Death	4	NEGATIVE															No	No		.								No	19.487	No	No	No	No	Unknown	No
94	5	PUI	2	No	40-49		jan2021		39		M	African		Supplemental Oxygen or Death	4	NEGATIVE															No	No	Not Detected	N/A	364	304	1.19737	13.3	0.72	0.95	14	No	19.487	No	No	No	No	Unknown	No
95	1	PUI	2	No	70-79		jan2021		3		F	African	No	Supplemental Oxygen or Death	4	NEGATIVE			No	0	0	0	0	0	0	0	0	0	0	0	No	No	Detected	30.50333333				2.9	0.25	0.63	4.60317	No	27.4077	No	Yes	No	No	No	No
95	2	PUI	2	Yes	70-79		jan2021		5		F	African	No	Supplemental Oxygen or Death	8	NEGATIVE															No	No										No	27.4077	No	Yes	No	No	No	No
96	1	PUI	2	No	40-49		jan2021		8		F	African	No	Supplemental Oxygen or Death	4	NEGATIVE			No	0	0	0	0	0	0	0	0	0	0	0	No	No	Not Detected	N/A	367	221	1.66063	9.36	0.45	1.18	7.9322	No	49.5868	No	Yes	No	No	No	No
96	2	PUI	2	No	40-49		jan2021		15		F	African	No	Supplemental Oxygen or Death	4	NEGATIVE															No	No	Not Detected	N/A								No	49.5868	No	Yes	No	No	No	No
97	1	PUI	2	No	30-39		jan2021		9		F	African	No	Supplemental Oxygen or Death	4	POSITIVE	40		Yes	0	34.99	1430	0	0	0	0	0	0	0	0	No	No	2Targets	>36.825	806	837	0.962963	14.22	0.28	2.43	5.85185	No	47.3469	Yes	Yes	No	No	No	No
97	2	PUI	2	Yes	30-39		jan2021		15		F	African	No	Mild	3	POSITIVE															No	No										No	47.3469	Yes	Yes	No	No	No	No
98	1	Case	2	No	60-69	jan2021	jan2021	8	8	0	F	Indian	No	Supplemental Oxygen or Death	4	NEGATIVE			No	0	0	0	0	0	0	0	0	0	0	0	No	No	Detected	31.37666667	883	434	2.03456	8.55	0.54	2.58	3.31395	No	19.6072	Yes	Yes	No	No	No	No
98	2	Case	2	Yes	60-69	jan2021	jan2021	14	14	0	F	Indian	No	Mild	2	NEGATIVE															No	No										No	19.6072	Yes	Yes	No	No	No	No
98	3	Case	2	Yes	60-69	jan2021	jan2021	22	22	0	F	Indian	No	Mild	2	NEGATIVE															No	No										No	19.6072	Yes	Yes	No	No	No	No
98	4	Case	2	No	60-69	jan2021	jan2021	29	29	0	F	Indian	No	Mild	2	NEGATIVE															No	No	Detected	38.30666667	904	954	0.947589	5.76	0.63	2.56	2.25	No	19.6072	Yes	Yes	No	No	No	No
98	5	Case	2	No	60-69	jan2021	jan2021	36	36	0	F	Indian	No	Mild	2	NEGATIVE															No	No	Not Detected	N/A	1044	1382	0.755427	6.28	0.51	3.11	2.01929	No	19.6072	Yes	Yes	No	No	No	No
99	1	Case	2	No	50-59	jan2021	jan2021	12	13	1	F	Indian	No	Supplemental Oxygen or Death	4	NEGATIVE			No	0	0	0	0	0	0	0	0	0	0	0	No	No	Detected	31.56333333	227	288	0.788194	11.4	0.61	0.79	14.4304	No	24.0346	Yes	Yes	Yes	No	No	No
99	2	Case	2	Yes	50-59	jan2021	jan2021	19	20	1	F	Indian	No	Asymptomatic	1	NEGATIVE															No	No										No	24.0346	Yes	Yes	Yes	No	No	No
100	1	Case	2	No	20-29	jan2021	jan2021	8	11	3	F	African	No	Supplemental Oxygen or Death	5	NEGATIVE			No	0	0	0	0	0	0	0	0	0	0	0	No	No	Detected	17.39333333	43	32	1.34375	7.24	0.26	0.19	38.1053	No	20.6575	No	No	Yes	Yes	No	No
100	2	Case	2	Yes	20-29	jan2021	jan2021	12	15	3	F	African	No	Supplemental Oxygen or Death	8	NEGATIVE															No	No										No	20.6575	No	No	Yes	Yes	No	No
101	1	Case	2	No	60-69	jan2021	jan2021	11	11	0	F	African	No	Mild	3	NEGATIVE			No	0	0	0	0	0	0	0	0	0	0	0	No	No	Detected	27.98333333	1084	544	1.99265	5.44	0.78	2.28	2.38596	No	26.8136	No	No	No	No	No	No
101	3	Case	2	Yes	60-69	jan2021	jan2021	22	22	0	F	African	No	Mild	3	NEGATIVE															No	No										No	26.8136	No	No	No	No	No	No
101	4	Case	2	Yes	60-69	jan2021	jan2021	32	32	0	F	African	No	Mild	2	NEGATIVE															No	No										No	26.8136	No	No	No	No	No	No
101	5	Case	2	No	60-69	jan2021	jan2021	41	41	0	F	African	No	Mild	3	NEGATIVE															No	No	Not Detected	N/A	681	466	1.46137	2.75	0.34	1.43	1.92308	No	26.8136	No	No	No	No	No	No
102	1	Case	2	No	20-29	jan2021	jan2021	5			F	African	Yes	Asymptomatic	1	POSITIVE	63716	dec2019	Yes	<90	100.19	4570	0	0	0	0	0	0	0	0	No	No	Not Detected	N/A	161	1708	0.0942623	2.36	0.79	2.14	1.1028	No		No	No	Yes	No	No	No
102	2	Case	2	No	20-29	jan2021	jan2021	13			F	African	Yes	Asymptomatic	1	POSITIVE	78290	dec2019	Yes	0	92.3	4656.62	0	0	0	0	0	0	0	0	No	No	Not Detected	N/A	133	1335	0.0996255	2.71	0.83	1.69	1.60355	No		No	No	Yes	No	No	No
102	3	Case	2	No	20-29	jan2021	jan2021	19			F	African	Yes	Asymptomatic	1	POSITIVE	21181	dec2019	Yes	<90	146	4966.62	0	0	0	0	0	0	0	0	No	No	Not Detected	N/A	115	1261	0.0911975	2.01	0.71	1.7	1.18235	No		No	No	Yes	No	No	No
102	4	Case	2	No	20-29	jan2021	jan2021	28			F	African	Yes	Asymptomatic	1	POSITIVE	17158	dec2019	Yes	<90	82.5	4973.7	0	0	0	0	0	0	0	0	No	No	Not Detected	N/A	160	1216	0.131579	2.35	0.85	1.58	1.48734	No		No	No	Yes	No	No	No
102	5	Case	2	No	20-29	jan2021	jan2021	33			F	African	Yes	Asymptomatic	1	POSITIVE	36370	dec2019	Yes	<90	91.5	>5000	0	0	0	0	0	0	0	0	No	No	Not Detected	N/A	142	1347	0.105419	4.08	0.8	1.48	2.75676	No		No	No	Yes	No	No	No
103	1	Case	2	No	30-39	jan2021	jan2021	9			M	African		Supplemental Oxygen or Death	4	NEGATIVE			No	0	0	0	0	0	0	0	0	0	0	0	No	No	Not Detected	N/A	63	29	2.17241	8.86	0.23	0.25	35.44	No	24.9199	No	Yes	No	Yes	No	No
103	2	Case	2	No	30-39	jan2021	jan2021	16			M	African		Asymptomatic	1	NEGATIVE															No	No	Not Detected	N/A	438	320	1.36875	3.91	0.34	1.37	2.85401	No	24.9199	No	Yes	No	Yes	No	No
103	3	Case	2	No	30-39	jan2021	jan2021	23			M	African		Supplemental Oxygen or Death	4	NEGATIVE															No	No										No	24.9199	No	Yes	No	Yes	No	No
103	4	Case	2	No	30-39	jan2021	jan2021	30			M	African		Supplemental Oxygen or Death	4	NEGATIVE															No	No	Not Detected	N/A	295	240	1.22917	3.97	0.59	0.95	4.17895	No	24.9199	No	Yes	No	Yes	No	No
104	1	Case	2	No	50-59	dec2020	feb2021	35	40	5	F	African	No	Supplemental Oxygen or Death	4	NEGATIVE			No	0	0	0	0	0	0	0	0	0	0	0	No	No	Not Detected	N/A	1260	1162	1.08434	6.91	0.89	3.19	2.16614	No	23.3844	No	No	No	Yes	No	No
104	2	Case	2	No	50-59	dec2020	feb2021	42	47	5	F	African	No	Supplemental Oxygen or Death	4	NEGATIVE			No	0	0	0	0	0	0	0	0	0	0	0	No	No	Not Detected	N/A	1010	830	1.21687	4.41	0.72	2.12	2.08019	No	23.3844	No	No	No	Yes	No	No
104	3	Case	2	No	50-59	dec2020	feb2021	49	54	5	F	African	No	Supplemental Oxygen or Death	4	NEGATIVE															No	No	Not Detected	N/A	1439	1345	1.06989	5.72	0.87	3.18	1.79874	No	23.3844	No	No	No	Yes	No	No
104	4	Case	2	No	50-59	dec2020	feb2021	56	61	5	F	African	No	Supplemental Oxygen or Death	4	NEGATIVE															No	No	Not Detected	N/A	1529	1387	1.10238	5.13	0.76	2.91	1.76289	No	23.3844	No	No	No	Yes	No	No
104	5	Case	2	No	50-59	dec2020	feb2021	63	68	5	F	African	No	Supplemental Oxygen or Death	4	NEGATIVE															No	No	Inconclusive	N/A	2200	2221	0.990545	6.27	0.94	4.63	1.35421	No	23.3844	No	No	No	Yes	No	No
105	1	Case	2	No	40-49	jan2021	feb2021	8	11	3	F	African	No	Supplemental Oxygen or Death	4	POSITIVE	40		Yes	0	<20	0	0	0	0	0	0	0	0	0	No	No	Detected	32.8	144	184	0.782609	7.96	0.21	0.49	16.2449	No		No	No	No	No	No	No
105	2	Case	2	Yes	40-49	jan2021	feb2021	15	18	3	F	African	No	Mild	2	POSITIVE															No	No										No		No	No	No	No	No	No
106	1	Case	2	No	40-49	feb2021	feb2021	1	2	1	F	African	No	Mild	3	POSITIVE	174	jul2012	Yes	0	222	0	0	0	0	0	0	0	0	0	No	No	Detected	35.04666667	200	640	0.3125	2.84	0.29	1.09	2.6055	No	22.2656	No	Yes	No	Yes	No	No
106	2	Case	2	No	40-49	feb2021	feb2021	8	9	1	F	African	No	Asymptomatic	1	POSITIVE	282572	jul2012	No	0	0	0	0	0	0	0	0	0	0	0	No	No	Detected	36.00333333	104	584	0.178082	4.38	0.22	0.98	4.46939	No	22.2656	No	Yes	No	Yes	No	No
106	3	Case	2	No	40-49	feb2021	feb2021	15	16	1	F	African	No	Asymptomatic	1	POSITIVE	296807	jul2012	No	0	0	0	0	0	0	0	0	0	0	0	No	No	Detected	25.02666667	81	942	0.0859873	2.21	0.55	1.19	1.85714	No	22.2656	No	Yes	No	Yes	No	No
106	4	Case	2	No	40-49	feb2021	feb2021	22	23	1	F	African	No	Supplemental Oxygen or Death	4	POSITIVE	214886	jul2012	No	0	0	0	0	0	0	0	0	0	0	0	No	No	Not Detected	N/A	63	1705	0.0369501	3.62	0.31	1.7	2.12941	No	22.2656	No	Yes	No	Yes	No	No
106	5	Case	2	No	40-49	feb2021	feb2021	29	30	1	F	African	No	Mild	2	POSITIVE	2044	jul2012													No	No	Not Detected	N/A	144	2720	0.0529412	1.53	0.54	2.96	0.516892	No	22.2656	No	Yes	No	Yes	No	No
107	1	Case	2	No	20-29	feb2021	feb2021	2	10	8	M	African		Asymptomatic	1	NEGATIVE			No	0	0	0	0	0	0	0	0	0	0	0	No	No	Not Detected	N/A	815	378	2.15608	3.54	1.21	1.69	2.09467	No	27.2509	No	No	No	No	No	No
107	2	Case	2	No	20-29	feb2021	feb2021	9	17	8	M	African		Mild	3	NEGATIVE															No	No	Not Detected	N/A	662	260	2.54615	4.74	0.67	1.14	4.15789	No	27.2509	No	No	No	No	No	No
107	3	Case	2	No	20-29	feb2021	feb2021	16	24	8	M	African		Mild	3	NEGATIVE															No	No	Not Detected	N/A	1000	390	2.5641	4.39	0.81	1.66	2.64458	No	27.2509	No	No	No	No	No	No
107	4	Case	2	No	20-29	feb2021	feb2021	23	31	8	M	African		Asymptomatic	1	NEGATIVE															No	No	Not Detected	N/A	1218	556	2.19065	6.11	1.29	2.23	2.73991	No	27.2509	No	No	No	No	No	No
107	5	Case	2	No	20-29	feb2021	feb2021	30	38	8	M	African		Asymptomatic	1	NEGATIVE															No	No	Not Detected	N/A	1029	419	2.45585	3.52	1	1.74	2.02299	No	27.2509	No	No	No	No	No	No
108	1	Case	1	No	<20	jun2020	jun2020	4	4	0	F	African	No	Mild	3	NEGATIVE			No	0	0	0	0	0	0	0	0	0	0	0	No	No	Not Detected	N/A	1099	639	1.71987	3.07	0.31	2.09	1.4689	No	29.7442	No	No	No	No	No	No
108	2	Case	1	No	<20	jun2020	jun2020	11	11	0	F	African	No	Mild	3	NEGATIVE			No	0	0	0	0	0	0	0	0	0	0	0	No	No	Detected	33.05584066	1036	539	1.92208	4.93	0.47	2.32	2.125	No	29.7442	No	No	No	No	No	No
109	1	Case	1	No	40-49	jun2020	jun2020	4	6	2	F	Indian	No	Mild	3	NEGATIVE			No	0	0	0	0	0	0	0	0	0	0	0	No	No	2Targets	>33.632277265	687	323	2.12694	6.84	0.62	1.89	3.61905	No	25.2363	No	No	No	No	No	No
109	2	Case	1	No	40-49	jun2020	jun2020	11	13	2	F	Indian	No	Mild	3	NEGATIVE			No	0	0	0	0	0	0	0	0	0	0	0	No	No	Inconclusive	N/A	584	235	2.48511	7.72	0.57	1.16	6.65517	No	25.2363	No	No	No	No	No	No
109	6	Case	1	Yes	40-49	jun2020	jun2020	95	97	2	F	Indian	No	Mild	2	NEGATIVE															No	No										No	25.2363	No	No	No	No	No	No
109	7	Case	1	Yes	40-49	jun2020	jun2020	175	177	2	F	Indian	No	Mild	2	NEGATIVE															No	No										No	25.2363	No	No	No	No	No	No
110	1	Case	1	No	30-39	jun2020	jun2020	6	21	15	F	African	No	Mild	3	POSITIVE	40	sep2015	Yes	0	<20	479	0	0	0	0	0	0	0	0	No	No	Not Detected	N/A	1598	1128	1.41667	8.12	0.87	3.6	2.25556	No	24.7676	No	No	No	No	Yes	No
110	2	Case	1	No	30-39	jun2020	jun2020	13	28	15	F	African	No	Mild	2	POSITIVE	40	sep2015	Yes	0	0	342	0	0	0	0	0	0	0	0	No	No	Not Detected	N/A	1174	1057	1.11069	6.38	0.78	3.16	2.01899	No	24.7676	No	No	No	No	Yes	No
111	1	Case	1	No	50-59	jun2020	jun2020	2	2	0	F	African	No	Mild	3	POSITIVE	40		Yes	0	0	195	0	0	0	0	0	0	0	0	No	No	Detected	20.33442871333333	544	467	1.16488	1.74	0.29	1.3	1.33846	No	34.2857	No	No	No	No	No	No
111	2	Case	1	No	50-59	jun2020	jun2020	9	9	0	F	African	No	Asymptomatic	1	POSITIVE	40		Yes	<90	168.47	1330	0	0	0	0	0	0	0	0	No	No	Detected	25.09106372	589	592	0.994932	2.32	0.29	1.5	1.54667	No	34.2857	No	No	No	No	No	No
112	1	Case	1	No	40-49	may2020	jun2020	44	6	-38	F	African	No	Asymptomatic	1	NEGATIVE			No	0	0	0	0	0	0	0	0	0	0	0	No	No	Not Detected	N/A	2421	581	4.16695	2.31	0.25	3.97	0.581864	No	32.6608	No	No	No	No	No	No
112	2	Case	1	No	40-49	may2020	jun2020	51	13	-38	F	African	No	Asymptomatic	1	NEGATIVE			No	0	0	0	0	0	0	0	0	0	0	0	No	No	Not Detected	N/A	1715	480	3.57292	2.94	0.27	2.97	0.989899	No	32.6608	No	No	No	No	No	No
112	4	Case	1	No	40-49	may2020	jun2020	65	27	-38	F	African	No	Asymptomatic	1	NEGATIVE															No	No	Not Detected	N/A	1793	540	3.32037	1.95	0.31	3.07	0.635179	No	32.6608	No	No	No	No	No	No
112	5	Case	1	No	40-49	may2020	jun2020	77	39	-38	F	African	No	Asymptomatic	1	NEGATIVE															No	No	Not Detected	N/A	1690	452	3.73894	2.34	0.19	2.72	0.860294	No	32.6608	No	No	No	No	No	No
112	6	Case	1	Yes	40-49	may2020	jun2020	134	96	-38	F	African	No	Asymptomatic	1	NEGATIVE															No	No										No	32.6608	No	No	No	No	No	No
112	7	Case	1	No	40-49	may2020	jun2020	213	175	-38	F	African	No	Asymptomatic	1	NEGATIVE															No	No	Not Detected	N/A	1797	417	4.30935	1.88	0.2	2.96	0.635135	No	32.6608	No	No	No	No	No	No
112	8	Case	1	No	40-49	may2020	jun2020	318	280	-38	F	African	No	Asymptomatic	1	NEGATIVE															No	No	Not Detected	N/A	1520	445	3.41573	1.78	0.22	2.51	0.709163	No	32.6608	No	No	No	No	No	No
113	1	Case	1	No	50-59	jun2020	jun2020	4	7	3	F	African	No	Mild	3	NEGATIVE			No	0	0	0	0	0	0	0	0	0	0	0	No	No	Detected	16.75584097	350	325	1.07692	2.24	0.25	0.9	2.48889	No	36.5713	Yes	Yes	No	No	No	No
113	2	Case	1	No	50-59	jun2020	jun2020	11	14	3	F	African	No	Mild	3	NEGATIVE			No	0	0	0	0	0	0	0	0	0	0	0	No	No		.	266	169	1.57396	7.85	0.65	0.98	8.0102	No	36.5713	Yes	Yes	No	No	No	No
113	3	Case	1	No	50-59	jun2020	jun2020	18	21	3	F	African	No	Mild	3	NEGATIVE															No	No	Not Detected	N/A	1008	438	2.30137	4.21	0.67	2.07	2.03382	No	36.5713	Yes	Yes	No	No	No	No
113	5	Case	1	No	50-59	jun2020	jun2020	35	38	3	F	African	No	Mild	2	NEGATIVE															No	No	Not Detected	N/A	424	267	1.58801	1.86	0.43	1.01	1.84158	No	36.5713	Yes	Yes	No	No	No	No
113	6	Case	1	Yes	50-59	jun2020	jun2020	93	96	3	F	African	No	Asymptomatic	1	NEGATIVE															No	No										No	36.5713	Yes	Yes	No	No	No	No
113	7	Case	1	No	50-59	jun2020	jun2020	172	175	3	F	African	No	Asymptomatic	1	NEGATIVE															No	No	Not Detected	N/A	661	400	1.6525	1.78	0.27	1.34	1.32836	No	36.5713	Yes	Yes	No	No	No	No
113	8	Case	1	No	50-59	jun2020	jun2020	280	283	3	F	African	No	Asymptomatic	1	NEGATIVE															No	No	Not Detected	N/A	610	432	1.41204	2.72	0.31	1.27	2.14173	No	36.5713	Yes	Yes	No	No	No	No
114	1	Case	1	No	80-89	jun2020	jun2020	3	15	12	F	Coulored	No	Mild	3	NEGATIVE			No	0	0	0	0	0	0	0	0	0	0	0	No	No	Detected	21.24924073	208	99	2.10101	7.27	0.73	0.72	10.0972	No	23.833	No	Yes	No	No	No	No
114	2	Case	1	Yes	80-89	jun2020	jun2020	12	24	12	F	Coulored	No	Supplemental Oxygen or Death	8	NEGATIVE															No	No		.								No	23.833	No	Yes	No	No	No	No
115	1	Case	1	No	30-39	jun2020	jun2020	15			F	African	Yes	Asymptomatic	1	NEGATIVE			No	0	0	0	0	0	0	0	0	0	0	0	No	No	2Targets	>32.16491703	920	686	1.34111	5.63	0.53	1.96	2.87245	No		No	No	No	No	No	No
115	6	Case	1	Yes	30-39	jun2020	jun2020	104			F	African	Yes	Asymptomatic	1	NEGATIVE															No	No										No		No	No	No	No	No	No
115	7	Case	1	Yes	30-39	jun2020	jun2020	182			F	African	Yes	Asymptomatic	1	NEGATIVE															No	No										No		No	No	No	No	No	No
116	1	Case	1	No	40-49	jun2020	jun2020	10			F	African	No	Mild	3	POSITIVE	40	sep2009	Yes	0	<20	373	0	0	0	0	0	0	0	0	No	No	2Targets	>36.70767839	1134	941	1.2051	4.34	0.82	2.95	1.47119	No	25.3515	No	No	No	No	No	No
116	2	Case	1	No	40-49	jun2020	jun2020	17			F	African	No	Mild	3	POSITIVE	40	sep2009	Yes	<90	223.7	3490	0	0	0	0	0	0	0	0	No	No	Not Detected	N/A	986	869	1.13464	5.67	0.67	2.43	2.33333	No	25.3515	No	No	No	No	No	No
116	3	Case	1	No	40-49	jun2020	jun2020	24			F	African	No	Mild	2	POSITIVE	40	sep2009													No	No	Not Detected	N/A	1011	860	1.17558	4.26	0.49	2.33	1.82833	No	25.3515	No	No	No	No	No	No
116	4	Case	1	No	40-49	jun2020	jun2020	31			F	African	No	Mild	2	POSITIVE	40	sep2009	Yes	<90	119.7	3890	0	0	0	0	0	0	0	0	No	No	Not Detected	N/A	791	654	1.20948	3.99	0.48	2.59	1.54054	No	25.3515	No	No	No	No	No	No
116	5	Case	1	No	40-49	jun2020	jun2020	38			F	African	No	Asymptomatic	1	POSITIVE	40	sep2009	Yes	<90	26.8	3130	0	0	0	0	0	0	0	0	No	No	Not Detected	N/A	1009	857	1.17736	3.49	0.45	2.42	1.44215	No	25.3515	No	No	No	No	No	No
117	1	Case	1	No	40-49	jun2020	jun2020	5			F	African	No	Asymptomatic	1	POSITIVE	40	jun2012	Yes	<90	24.27	414	0	0	0	0	0	0	0	0	No	No	Detected	20.40981568	703	637	1.10361	0.78	0.3	1.94	0.402062	No	30.1162	No	No	No	No	No	No
117	2	Case	1	No	40-49	jun2020	jun2020	12			F	African	No	Asymptomatic	1	POSITIVE	40	jun2012	Yes	<90	139.7	2120	0	0	0	0	0	0	0	0	No	No	2Targets	>38.244792275	539	549	0.981785	2.46	0.14	1.64	1.5	No	30.1162	No	No	No	No	No	No
117	3	Case	1	No	40-49	jun2020	jun2020	19			F	African	No	Asymptomatic	1	POSITIVE	40	jun2012	Yes	<90	<20	1730	0	0	0	0	0	0	0	0	No	No	Inconclusive	N/A	609	582	1.04639	1.79	0.27	1.62	1.10494	No	30.1162	No	No	No	No	No	No
117	5	Case	1	No	40-49	jun2020	jun2020	33			F	African	No	Asymptomatic	1	POSITIVE	40	jun2012	Yes	<90	21.4	1410	0	0	0	0	0	0	0	0	No	No	Not Detected	N/A	661	636	1.03931	2.9	0.32	1.95	1.48718	No	30.1162	No	No	No	No	No	No
117	6	Case	1	Yes	40-49	jun2020	jun2020	99			F	African	No	Asymptomatic	1	POSITIVE		jun2012													No	No										No	30.1162	No	No	No	No	No	No
117	7	Case	1	Yes	40-49	jun2020	jun2020	176			F	African	No	Asymptomatic	1	POSITIVE		jun2012													No	No										No	30.1162	No	No	No	No	No	No
118	1	Case	1	No	80-89	jun2020	jul2020	12	19	7	F	African	No	Mild	3	NEGATIVE			No	0	0	0	0	0	0	0	0	0	0	0	No	No	Detected	30.2186733	633	573	1.10471	2.94	0.45	1.77	1.66102	No	41.0156	Yes	Yes	No	No	Yes	No
118	6	Case	1	Yes	80-89	jun2020	jul2020	102	109	7	F	African	No	Mild	2	NEGATIVE															No	No										No	41.0156	Yes	Yes	No	No	Yes	No
118	8	Case	1	No	80-89	jun2020	jul2020	294	301	7	F	African	No	Asymptomatic	1	NEGATIVE															No	No	Not Detected	N/A	568	739	0.768606	1.79	0.36	1.71	1.04678	No	41.0156	Yes	Yes	No	No	Yes	No
119	1	Case	1	No	40-49	jun2020	jul2020	2			F	African	No	Mild	3	NEGATIVE			No	0	0	0	0	0	0	0	0	0	0	0	No	No	Inconclusive	N/A	1400	541	2.5878	1.15	0.4	2.53	0.454545	No	38.215	No	Yes	No	No	No	No
119	2	Case	1	No	40-49	jun2020	jul2020	9			F	African	No	Mild	3	NEGATIVE															No	No	Not Detected	N/A	1209	443	2.72912	3	0.43	2.32	1.2931	No	38.215	No	Yes	No	No	No	No
119	3	Case	1	No	40-49	jun2020	jul2020	15			F	African	No	Asymptomatic	1	NEGATIVE															No	No	Not Detected	N/A	1199	476	2.51891	3.24	0.35	2.29	1.41485	No	38.215	No	Yes	No	No	No	No
119	4	Case	1	No	40-49	jun2020	jul2020	23			F	African	No	Asymptomatic	1	NEGATIVE															No	No	Not Detected	N/A	1697	648	2.61883	3.35	0.55	3.03	1.10561	No	38.215	No	Yes	No	No	No	No
119	5	Case	1	No	40-49	jun2020	jul2020	30			F	African	No	Mild	2	NEGATIVE															No	No	Not Detected	N/A	1202	452	2.65929	3.01	0.36	2.45	1.22857	No	38.215	No	Yes	No	No	No	No
119	6	Case	1	No	40-49	jun2020	jul2020	93			F	African	No	Asymptomatic	1	NEGATIVE															No	No	Not Detected	N/A	1508	609	2.47619	3.49	0.52	2.9	1.20345	No	38.215	No	Yes	No	No	No	No
119	7	Case	1	Yes	40-49	jun2020	jul2020	171			F	African	No	Asymptomatic	1	NEGATIVE															No	No										No	38.215	No	Yes	No	No	No	No
119	8	Case	1	No	40-49	jun2020	jul2020	275			F	African	No	Asymptomatic	1	NEGATIVE															No	No	Not Detected	N/A	1318	663	1.98793	3.35	0.47	2.78	1.20504	No	38.215	No	Yes	No	No	No	No
120	1	Case	1	No	50-59	jun2020	jul2020	3	3	0	F	African	No	Mild	3	POSITIVE	40	jun2010	Yes	<90	298.47	0	0	0	0	0	0	0	0	0	No	Yes	Detected	18.15911788	306	386	0.792746	1.4	0.46	1.01	1.38614	No	31.25	No	No	No	No	No	No
120	2	Case	1	No	50-59	jun2020	jul2020	10	10	0	F	African	No	Asymptomatic	1	POSITIVE	40	jun2010	Yes	<90	118.7	0	0	0	0	0	0	0	0	0	No	Yes	Detected	25.78442519333333	276	376	0.734043	4.79	0.42	1.23	3.89431	No	31.25	No	No	No	No	No	No
120	3	Case	1	No	50-59	jun2020	jul2020	17	17	0	F	African	No	Mild	2	POSITIVE	40	jun2010	Yes	93.6	261.7	0	0	0	0	0	0	0	0	0	No	Yes	Not Detected	N/A	542	556	0.97482	5.7	0.64	1.75	3.25714	No	31.25	No	No	No	No	No	No
120	5	Case	1	No	50-59	jun2020	jul2020	30	30	0	F	African	No	Mild	2	POSITIVE	40	jun2010	Yes	<90	186.7	0	0	0	0	0	0	0	0	0	No	Yes	Not Detected	N/A	411	554	0.741877	3.62	0.48	1.61	2.24845	No	31.25	No	No	No	No	No	No
120	6	Case	1	No	50-59	jun2020	jul2020	94	94	0	F	African	No	Asymptomatic	1	POSITIVE	40	jun2010	Yes	<90	363	0	0	0	0	0	0	0	0	0	No	Yes	Not Detected	N/A	428	527	0.812144	2.88	0.39	1.3	2.21538	No	31.25	No	No	No	No	No	No
120	7	Case	1	No	50-59	jun2020	jul2020	169	169	0	F	African	No	Asymptomatic	1	POSITIVE	40	jun2010	Yes	<90	665.19	0	0	0	0	0	0	0	0	0	No	Yes	Not Detected	N/A	495	902	0.548781	3.55	0.57	2.06	1.7233	No	31.25	No	No	No	No	No	No
120	8	Case	1	No	50-59	jun2020	jul2020	283	283	0	F	African	No	Asymptomatic	1	POSITIVE	40	jun2010													No	Yes	Not Detected	N/A	619	565	1.09558	4.61	0.81	1.69	2.72781	No	31.25	No	No	No	No	No	No
121	1	Case	1	No	20-29	jun2020	jul2020	2	6	4	F	African	Yes	Mild	3	NEGATIVE			No	0	0	0	0	0	0	0	0	0	0	0	No	No	Not Detected	N/A	813	555	1.46486	1.64	0.38	1.66	0.987952	No		No	No	No	No	No	No
121	2	Case	1	No	20-29	jun2020	jul2020	9	13	4	F	African	Yes	Asymptomatic	1	NEGATIVE															No	No	Not Detected	N/A	696	498	1.39759	3.46	0.62	1.57	2.20382	No		No	No	No	No	No	No
121	3	Case	1	No	20-29	jun2020	jul2020	16	20	4	F	African	No	Asymptomatic	1	NEGATIVE															No	No	Not Detected	N/A	784	514	1.52529	3.16	0.48	1.62	1.95062	No	26.2188	No	No	No	No	No	No
121	6	Case	1	No	20-29	jun2020	jul2020	94	98	4	F	African	No	Asymptomatic	1	NEGATIVE															No	No	Not Detected	N/A	936	574	1.63066	1.98	0.26	1.76	1.125	No	26.2188	No	No	No	No	No	No
121	7	Case	1	Yes	20-29	jun2020	jul2020	96	100	4	F	African	No	Supplemental Oxygen or Death	8	NEGATIVE															No	No		.								No	26.2188	No	No	No	No	No	No
122	1	Case	1	No	40-49	jun2020	jul2020	9	12	3	F	African	No	Mild	3	NEGATIVE			No	0	0	0	0	0	0	0	0	0	0	0	No	No	Detected	29.75147174666666	825	798	1.03383	3.9	0.38	2.08	1.875	No	35.7851	No	Yes	No	No	No	No
122	2	Case	1	No	40-49	jun2020	jul2020	16	19	3	F	African	No	Mild	2	NEGATIVE															No	No	Inconclusive	N/A	913	846	1.0792	6.06	0.43	2.23	2.71749	No	35.7851	No	Yes	No	No	No	No
122	3	Case	1	No	40-49	jun2020	jul2020	23	26	3	F	African	No	Mild	2	NEGATIVE															No	No	Inconclusive	N/A	914	841	1.0868	5.66	0.49	2.16	2.62037	No	35.7851	No	Yes	No	No	No	No
122	4	Case	1	No	40-49	jun2020	jul2020	30	33	3	F	African	No	Mild	2	NEGATIVE															No	No	Not Detected	N/A	1026	964	1.06432	4.32	0.38	2.16	2	No	35.7851	No	Yes	No	No	No	No
122	6	Case	1	No	40-49	jun2020	jul2020	103	106	3	F	African	No	Asymptomatic	1	NEGATIVE															No	No	Not Detected	N/A	828	813	1.01845	4.38	0.42	1.97	2.22335	No	35.7851	No	Yes	No	No	No	No
122	7	Case	1	No	40-49	jun2020	jul2020	205	208	3	F	African	No	Mild	2	NEGATIVE															No	No	Not Detected	N/A				4.74	0.4	2.15	2.20465	No	35.7851	No	Yes	No	No	No	No
122	8	Case	1	No	40-49	jun2020	jul2020	286	289	3	F	African	No	Asymptomatic	1	NEGATIVE															No	No	Not Detected	N/A	869	737	1.1791	5.17	0.45	2	2.585	No	35.7851	No	Yes	No	No	No	No
123	1	Case	1	No	30-39	jun2020	jul2020	11	16	5	F	African	Yes	Mild	3	POSITIVE	40		Yes	<90	62.37	889	0	0	0	0	0	0	0	0	No	No	Not Detected	N/A	840	1127	0.745342	5.97	0.52	2.36	2.52966	No		No	No	No	No	No	No
124	1	Case	1	No	50-59	jun2020	jul2020	14	19	5	F	African	No	Mild	3	POSITIVE	40	jul2008	Yes	<90	103.7	0	0	0	0	0	0	0	0	0	No	Yes	Not Detected	N/A	1463	1048	1.39599	4.04	0.93	3.36	1.20238	No	28.9811	No	Yes	No	No	No	No
125	1	Case	1	No	40-49	jul2020	jul2020	3	7	4	F	African	No	Mild	3	NEGATIVE															No	No	Detected	23.92477451333333	725	359	2.0195	1.1	0.27	1.23	0.894309	No	31.6456	No	No	No	No	No	No
125	2	Case	1	No	40-49	jul2020	jul2020	10	14	4	F	African	No	Asymptomatic	1	NEGATIVE															No	No	2Targets	>35.114763625	892	560	1.59286	1.21	0.28	1.9	0.636842	No	31.6456	No	No	No	No	No	No
125	3	Case	1	No	40-49	jul2020	jul2020	17	21	4	F	African	No	Mild	2	NEGATIVE															No	No	Not Detected	N/A	935	637	1.46782	2.47	0.44	1.99	1.24121	No	31.6456	No	No	No	No	No	No
125	4	Case	1	No	40-49	jul2020	jul2020	24	28	4	F	African	No	Asymptomatic	1	NEGATIVE															No	No	Not Detected	N/A	973	587	1.65758	1.67	0.32	1.98	0.843434	No	31.6456	No	No	No	No	No	No
125	6	Case	1	No	40-49	jul2020	jul2020	95	99	4	F	African	No	Asymptomatic	1	NEGATIVE															No	No	Not Detected	N/A	869	527	1.64896	1.21	0.25	1.76	0.6875	No	31.6456	No	No	No	No	No	No
126	1	Case	1	No	20-29	jun2020	jul2020	9	9	0	F	African	No	Mild	3	POSITIVE	177218	dec2019	No	0	0	0	0	0	0	0	0	0	0	0	No	No	Not Detected	N/A	175	700	0.25	2.53	0.34	0.99	2.55556	No	21.875	No	No	No	No	No	No
126	2	Case	1	No	20-29	jun2020	jul2020	16	16	0	F	African	No	Asymptomatic	1	POSITIVE	111042	dec2019	No	0	0	0	0	0	0	0	0	0	0	0	No	No	Not Detected	N/A	278	1146	0.242583	2.26	0.26	1.56	1.44872	No	21.875	No	No	No	No	No	No
127	1	Case	1	No	50-59	jun2020	jul2020	12	18	6	F	African	No	Mild	3	NEGATIVE															No	No	Not Detected	N/A	1105	1087	1.01656	3.56	0.47	2.63	1.35361	No	36.215	No	Yes	No	No	No	No
127	5	Case	1	No	50-59	jun2020	jul2020	70	76	6	F	African	No	Asymptomatic	1	NEGATIVE															No	No	Inconclusive	N/A	962	783	1.22861	2.47	0.3	1.91	1.29319	No	36.215	No	Yes	No	No	No	No
127	6	Case	1	No	50-59	jun2020	jul2020	105	111	6	F	African	No	Mild	2	NEGATIVE															No	No	Not Detected	N/A	897	703	1.27596	2.99	0.36	2.2	1.35909	No	36.215	No	Yes	No	No	No	No
128	1	Case	1	No	50-59	jun2020	jul2020	11	12	1	F	African	No	Mild	3	NEGATIVE															No	No	Detected	28.49353955	1999	534	3.74345	2.77	0.49	3.36	0.824405	No	38.5788	No	No	No	No	No	No
128	6	Case	1	Yes	50-59	jun2020	jul2020	108	109	1	F	African	No	Mild	2	NEGATIVE															No	No										No	38.5788	No	No	No	No	No	No
129	1	Case	1	No	40-49	jun2020	jul2020	13	15	2	F	African	No	Mild	3	POSITIVE	40		Yes	<90	111.7	2270	0	0	0	0	0	0	0	0	No	No	2Targets	>39.07459335	929	330	2.81515	2.86	0.5	1.77	1.61582	No	36.215	No	No	No	No	No	No
129	8	Case	1	No	40-49	jun2020	jul2020	291	293	2	F	African	No	Asymptomatic	1	POSITIVE															No	No	Not Detected	N/A	789	279	2.82796	3.19	0.54	1.83	1.74317	No	36.215	No	No	No	No	No	No
130	1	Case	1	No	30-39	jul2020	jul2020	4	10	6	F	African	No	Mild	3	NEGATIVE															No	No	2Targets	>31.692910295	1212	511	2.37182	4.05	0.66	2.66	1.52256	No	32.0204	No	No	No	No	No	No
130	2	Case	1	No	30-39	jul2020	jul2020	11	17	6	F	African	No	Asymptomatic	1	NEGATIVE															No	No	2Targets	>35.446387005	1099	418	2.62919	4.29	0.45	2.19	1.9589	No	32.0204	No	No	No	No	No	No
130	3	Case	1	No	30-39	jul2020	jul2020	18	24	6	F	African	No	Mild	2	NEGATIVE															No	No	2Targets	>32.531426975	1290	550	2.34545	5.89	0.39	2.53	2.32806	No	32.0204	No	No	No	No	No	No
130	4	Case	1	No	30-39	jul2020	jul2020	25	31	6	F	African	No	Mild	2	NEGATIVE															No	No	Not Detected	N/A	1279	518	2.46911	4.32	0.54	2.39	1.80753	No	32.0204	No	No	No	No	No	No
130	6	Case	1	No	30-39	jul2020	jul2020	98	104	6	F	African	No	Asymptomatic	1	NEGATIVE															No	No	Not Detected	N/A	1807	697	2.59254	2.63	0.48	3.43	0.766764	No	32.0204	No	No	No	No	No	No
130	7	Case	1	No	30-39	jul2020	jul2020	193	199	6	F	African	No	Asymptomatic	1	NEGATIVE															No	No	Not Detected	N/A	1142	468	2.44017	6.15	0.52	2.34	2.62821	No	32.0204	No	No	No	No	No	No
130	8	Case	1	No	30-39	jul2020	jul2020	278	284	6	F	African	No	Asymptomatic	1	NEGATIVE															No	No	Not Detected	N/A	1441	567	2.54145	4.4	0.52	2.54	1.73228	No	32.0204	No	No	No	No	No	No
131	1	Case	1	No	40-49	jul2020	jul2020	6			F	African	No	Asymptomatic	1	NEGATIVE															No	No	Not Detected	N/A	1148	726	1.58127	2.01	0.24	2.27	0.885463	No	35.8177	No	No	No	No	No	No
131	2	Case	1	No	40-49	jul2020	jul2020	13			F	African	No	Asymptomatic	1	NEGATIVE															No	No	Not Detected	N/A	1055	582	1.81271	2.25	0.25	2.07	1.08696	No	35.8177	No	No	No	No	No	No
131	6	Case	1	No	40-49	jul2020	jul2020	100			F	African	No	Asymptomatic	1	NEGATIVE															No	No	Not Detected	N/A	859	460	1.86739	2.45	0.24	1.71	1.43275	No	35.8177	No	No	No	No	No	No
131	7	Case	1	No	40-49	jul2020	jul2020	199			F	African	No	Asymptomatic	1	NEGATIVE															No	No	Not Detected	N/A	1088	673	1.61664	1.86	0.19	2.3	0.808696	No	35.8177	No	No	No	No	No	No
131	8	Case	1	No	40-49	jul2020	jul2020	281			F	African	No	Asymptomatic	1	NEGATIVE															No	No	Not Detected	N/A	1182	777	1.52124	2.34	0.29	2.62	0.89313	No	35.8177	No	No	No	No	No	No
132	1	Case	1	No	60-69	jul2020	jul2020	11	11	0	F	African	No	Mild	3	NEGATIVE															No	No	Not Detected	N/A								No	33.1398	Yes	No	No	No	No	No
132	2	Case	1	No	60-69	jul2020	jul2020	18	18	0	F	African	No	Mild	3	NEGATIVE															No	No	Not Detected	N/A	1116	493	2.26369	12.03	2.41	2.64	4.55682	No	33.1398	Yes	No	No	No	No	No
132	4	Case	1	No	60-69	jul2020	jul2020	33	33	0	F	African	No	Mild	2	NEGATIVE															No	No	Not Detected	N/A	884	582	1.5189	3.92	1.17	2.07	1.89372	No	33.1398	Yes	No	No	No	No	No
132	5	Case	1	No	60-69	jul2020	jul2020	39	39	0	F	African	No	Asymptomatic	1	NEGATIVE															No	No	Not Detected	N/A	1108	985	1.12487	4.97	1.33	2.54	1.95669	No	33.1398	Yes	No	No	No	No	No
133	1	Case	1	No	40-49	jul2020	jul2020	7	10	3	F	African	No	Mild	3	NEGATIVE															No	No	Not Detected	N/A	1610	410	3.92683	5.58	0.56	2.84	1.96479	No	31.25	No	No	No	No	No	No
133	2	Case	1	No	40-49	jul2020	jul2020	13	16	3	F	African	No	Mild	3	NEGATIVE															No	No	Detected	34.12540844666667	1250	314	3.98089	2.92	0.34	2.38	1.22689	No	31.25	No	No	No	No	No	No
133	3	Case	1	No	40-49	jul2020	jul2020	21	24	3	F	African	No	Mild	2	NEGATIVE															No	No	Not Detected	N/A	1074	315	3.40952	1.93	0.36	2.06	0.936893	No	31.25	No	No	No	No	No	No
133	4	Case	1	No	40-49	jul2020	jul2020	28	31	3	F	African	No	Asymptomatic	1	NEGATIVE															No	No	Inconclusive	N/A	1233	355	3.47324	2.08	0.3	2.18	0.954128	No	31.25	No	No	No	No	No	No
133	5	Case	1	No	40-49	jul2020	jul2020	35	38	3	F	African	No	Asymptomatic	1	NEGATIVE															No	No	Not Detected	N/A	1370	425	3.22353	2.7	0.45	2.32	1.16379	No	31.25	No	No	No	No	No	No
133	6	Case	1	No	40-49	jul2020	jul2020	98	101	3	F	African	No	Asymptomatic	1	NEGATIVE															No	No	Not Detected	N/A	1458	418	3.48804	2.64	0.31	2.62	1.00763	No	31.25	No	No	No	No	No	No
133	7	Case	1	No	40-49	jul2020	jul2020	196	199	3	F	African	No	Asymptomatic	1	NEGATIVE															No	No	Not Detected	N/A	1483	480	3.08958	1.88	0.33	2.59	0.725869	No	31.25	No	No	No	No	No	No
133	8	Case	1	No	40-49	jul2020	jul2020	280	283	3	F	African	No	Asymptomatic	1	NEGATIVE															No	No	Not Detected	N/A	1472	549	2.68124	1.81	0.25	2.82	0.641844	No	31.25	No	No	No	No	No	No
134	1	Case	1	No	40-49	jul2020	jul2020	8	9	1	F	African	No	Mild	3	POSITIVE	40		Yes	<90	94.7	3190	0	0	0	<180	0	0	0	0	No	No	Not Detected	N/A	1118	520	2.15	2.56	0.3	1.96	1.30612	No	29.7619	No	No	No	No	No	No
134	2	Case	1	No	40-49	jul2020	jul2020	15	16	1	F	African	No	Asymptomatic	1	POSITIVE	40		Yes	<90	77	2750	0	0	0	0	0	0	0	0	No	No	Not Detected	N/A	894	621	1.43961	4.46	0.39	1.9	2.34737	No	29.7619	No	No	No	No	No	No
134	3	Case	1	No	40-49	jul2020	jul2020	22	23	1	F	African	No	Mild	2	POSITIVE	40		Yes	<90	237.7	2870	0	0	0	0	0	0	0	0	No	No	Not Detected	N/A	1303	775	1.68129	2.47	0.5	2.83	0.872792	No	29.7619	No	No	No	No	No	No
134	5	Case	1	No	40-49	jul2020	jul2020	37	38	1	F	African	No	Asymptomatic	1	POSITIVE	40		Yes	<90	105.8	435	0	0	0	0	0	0	0	0	No	No	Not Detected	N/A	1410	724	1.94751	1.67	0.46	2.61	0.639847	No	29.7619	No	No	No	No	No	No
134	6	Case	1	Yes	40-49	jul2020	jul2020	98	99	1	F	African	No	Asymptomatic	1	POSITIVE															No	No										No	29.7619	No	No	No	No	No	No
134	7	Case	1	No	40-49	jul2020	jul2020	198	199	1	F	African	No	Mild	2	POSITIVE	40		Yes	<90	120.19	2560	0	0	0	0	0	0	0	0	No	No	Not Detected	N/A	1513	722	2.09557	2.06	0.38	2.66	0.774436	No	29.7619	No	No	No	No	No	No
134	8	Case	1	No	40-49	jul2020	jul2020	283	284	1	F	African	No	Asymptomatic	1	POSITIVE	40														No	No	Not Detected	N/A	1301	731	1.77975	1.56	0.42	2.63	0.593156	No	29.7619	No	No	No	No	No	No
135	1	Case	1	No	20-29	jul2020	jul2020	4			F	African	No	Asymptomatic	1	POSITIVE	8634	aug2019	No	0	0	0	0	0	0	0	0	0	0	0	No	No	Inconclusive	N/A	473	977	0.484135	2.62	0.58	1.91	1.37173	No	28.8415	No	No	No	No	No	No
135	2	Case	1	No	20-29	jul2020	jul2020	11			F	African	No	Asymptomatic	1	POSITIVE	12704	aug2019	No	0	0	0	0	0	0	0	0	0	0	0	No	No	Detected	31.69320228333333	420	867	0.484429	3.39	0.55	1.46	2.32192	No	28.8415	No	No	No	No	No	No
135	3	Case	1	No	20-29	jul2020	jul2020	18			F	African	No	Asymptomatic	1	POSITIVE	6720	aug2019	No	0	0	0	0	0	0	0	0	0	0	0	No	No	Detected	29.22757902333333	410	968	0.423554	2.7	0.39	1.89	1.42857	No	28.8415	No	No	No	No	No	No
135	4	Case	1	No	20-29	jul2020	jul2020	25			F	African	No	Asymptomatic	1	POSITIVE	3255	aug2019	No	0	0	0	0	0	0	0	0	0	0	0	No	No	Detected	33.68422573	304	829	0.366707	2.37	0.35	1.54	1.53896	No	28.8415	No	No	No	No	No	No
135	5	Case	1	No	20-29	jul2020	jul2020	32			F	African	No	Asymptomatic	1	POSITIVE	2432	aug2019	No	0	0	0	0	0	0	0	0	0	0	0	No	No	Not Detected	N/A	445	985	0.451777	2.92	0.45	1.81	1.61326	No	28.8415	No	No	No	No	No	No
135	6	Case	1	No	20-29	jul2020	jul2020	122			F	African	No	Asymptomatic	1	POSITIVE	2476	aug2019	No	0	0	0	0	0	0	0	0	0	0	0	No	No	Not Detected	N/A	581	1115	0.521076	3.62	0.54	1.9	1.90526	No	28.8415	No	No	No	No	No	No
135	7	Case	1	No	20-29	jul2020	jul2020	191			F	African	No	Asymptomatic	1	POSITIVE	3064	aug2019	No	0	0	0	0	0	0	0	0	0	0	0	No	No	Not Detected	N/A	483	1204	0.401163	3.42	0.65	2.13	1.60563	No	28.8415	No	No	No	No	No	No
135	8	Case	1	No	20-29	jul2020	jul2020	276			F	African	No	Asymptomatic	1	POSITIVE	3396	aug2019													No	No	Not Detected	N/A	489	1090	0.448624	4.29	0.63	1.98	2.16667	No	28.8415	No	No	No	No	No	No
136	1	Case	1	No	30-39	jul2020	jul2020	3	5	2	F	African	No	Mild	3	NEGATIVE															No	No	Not Detected	N/A	934	419	2.22912	1.89	0.27	1.73	1.09249	No	29.2421	No	No	No	No	No	No
136	2	Case	1	No	30-39	jul2020	jul2020	10	12	2	F	African	No	Asymptomatic	1	NEGATIVE			No	0	0	0	0	0	0	0	0	0	0	0	No	No	Not Detected	N/A	1672	595	2.81008	4.56	0.55	2.94	1.55102	No	29.2421	No	No	No	No	No	No
136	3	Case	1	No	30-39	jul2020	jul2020	17	19	2	F	African	No	Asymptomatic	1	NEGATIVE															No	No	Not Detected	N/A	915	339	2.69912	3.56	0.37	1.65	2.15758	No	29.2421	No	No	No	No	No	No
136	4	Case	1	No	30-39	jul2020	jul2020	24	26	2	F	African	No	Asymptomatic	1	NEGATIVE															No	No	Not Detected	N/A	977	383	2.55091	3.54	0.27	1.65	2.14545	No	29.2421	No	No	No	No	No	No
136	5	Case	1	No	30-39	jul2020	jul2020	32	34	2	F	African	No	Asymptomatic	1	NEGATIVE															No	No	Not Detected	N/A	1059	355	2.9831	3.54	0.39	1.67	2.11976	No	29.2421	No	No	No	No	No	No
136	6	Case	1	No	30-39	jul2020	jul2020	95	97	2	F	African	No	Asymptomatic	1	NEGATIVE															No	No	Not Detected	N/A	1134	400	2.835	3.68	0.35	1.96	1.87755	No	29.2421	No	No	No	No	No	No
137	1	Case	1	No	40-49	jul2020	jul2020	6	7	1	F	African	No	Asymptomatic	1	NEGATIVE															No	No	Not Detected	N/A	795	378	2.10317	4.19	0.52	1.7	2.46471	No	37.3784	No	No	No	No	No	No
137	2	Case	1	No	40-49	jul2020	jul2020	13	14	1	F	African	No	Asymptomatic	1	NEGATIVE															No	No	Not Detected	N/A	651	267	2.4382	4.13	0.49	1.69	2.44379	No	37.3784	No	No	No	No	No	No
138	1	Case	1	No	60-69	jul2020	jul2020	7	13	6	F	African	No	Mild	3	POSITIVE	40	jun2003	Yes	<90	0	<150	1080	0	0	0	273	0	0	0	No	No	Inconclusive	N/A	942	1135	0.829956	2.74	0.58	2.82	0.971631	No	29.0318	No	No	No	No	No	No
138	2	Case	1	No	60-69	jul2020	jul2020	14	20	6	F	African	No	Mild	3	POSITIVE	40	jun2003	Yes	<90	73.5	490	1870	0	0	0	<180	0	0	0	No	No	Inconclusive	N/A	913	1265	0.721739	2.95	0.51	2.47	1.19433	No	29.0318	No	No	No	No	No	No
138	3	Case	1	No	60-69	jul2020	jul2020	20	26	6	F	African	No	Mild	3	POSITIVE	40	jun2003	Yes	<90	<20	778	1730	0	0	0	<180	0	0	0	No	No	Not Detected	N/A	678	992	0.683468	3.04	0.36	2.01	1.51244	No	29.0318	No	No	No	No	No	No
138	4	Case	1	No	60-69	jul2020	jul2020	28	34	6	F	African	No	Asymptomatic	1	POSITIVE	40	jun2003	Yes	<90	0	<150	2190	0	0	0	<180	0	0	0	No	No	Not Detected	N/A	807	1205	0.66971	2.97	0.45	2.71	1.09594	No	29.0318	No	No	No	No	No	No
138	5	Case	1	No	60-69	jul2020	jul2020	35	41	6	F	African	No	Mild	2	POSITIVE	40	jun2003	Yes	<90	0	0	3570	0	0	0	253.3	0	0	0	No	No	Not Detected	N/A	822	1041	0.789625	3.26	0.39	2.33	1.39914	No	29.0318	No	No	No	No	No	No
138	6	Case	1	No	60-69	jul2020	jul2020	98	104	6	F	African	No	Asymptomatic	1	POSITIVE	40	jun2003	Yes	<90	0	0	2621.4	0	0	0	241.9	0	0	0	No	No	Not Detected	N/A	732	948	0.772152	3.12	0.36	2.27	1.37445	No	29.0318	No	No	No	No	No	No
138	8	Case	1	No	60-69	jul2020	jul2020	280	286	6	F	African	No	Asymptomatic	1	POSITIVE	40	jun2003													No	No	Not Detected	N/A	913	1228	0.743485	3.34	0.35	2.5	1.336	No	29.0318	No	No	No	No	No	No
139	1	Case	1	No	50-59	jul2020	jul2020	10	41	31	F	African	No	Mild	3	POSITIVE	40	jan2001	Yes	<90	115.7	>5000	0	0	0	0	0	0	0	0	No	Yes	Not Detected	N/A	747	830	0.9	2.36	0.6	1.88	1.25532	No	29.6427	No	No	No	No	No	No
139	2	Case	1	No	50-59	jul2020	jul2020	17	48	31	F	African	No	Asymptomatic	1	POSITIVE	40	jan2001	Yes	<90	93.7	>5000	0	0	0	0	0	0	0	0	No	Yes	2Targets	>35.773915075	376	470	0.8	5.17	0.22	1.2	4.30833	No	29.6427	No	No	No	No	No	No
139	4	Case	1	No	50-59	jul2020	jul2020	31	62	31	F	African	No	Asymptomatic	1	POSITIVE	40	jan2001	Yes	127.3	709.8	1450	0	0	0	0	0	0	0	0	No	Yes	Inconclusive	N/A	624	718	0.869081	3.12	0.46	1.69	1.84615	No	29.6427	No	No	No	No	No	No
139	6	Case	1	No	50-59	jul2020	jul2020	101	132	31	F	African	No	Asymptomatic	1	POSITIVE	40	jan2001	Yes	<90	<20	>5000	0	0	0	0	<180	0	0	0	No	Yes	Not Detected	N/A	661	791	0.835651	2.12	0.33	1.86	1.13978	No	29.6427	No	No	No	No	No	No
140	1	Case	1	No	30-39	jun2020	jul2020	20	23	3	F	African	No	Mild	3	NEGATIVE															No	No	Detected	28.28597817666667	1182	432	2.73611	2.97	0.34	2.02	1.4703	No	32.4219	No	No	No	No	No	No
140	2	Case	1	No	30-39	jun2020	jul2020	27	30	3	F	African	No	Mild	2	NEGATIVE															No	No	Not Detected	N/A	1066	373	2.85791	3.96	0.36	1.84	2.15217	No	32.4219	No	No	No	No	No	No
140	3	Case	1	No	30-39	jun2020	jul2020	34	37	3	F	African	No	Mild	2	NEGATIVE															No	No	Not Detected	N/A	1236	464	2.66379	3.71	0.31	2.08	1.78365	No	32.4219	No	No	No	No	No	No
140	4	Case	1	No	30-39	jun2020	jul2020	41	44	3	F	African	No	Mild	2	NEGATIVE															No	No	Not Detected	N/A	1407	566	2.48587	4.57	0.45	2.47	1.8502	No	32.4219	No	No	No	No	No	No
140	5	Case	1	No	30-39	jun2020	jul2020	48	51	3	F	African	No	Mild	2	NEGATIVE															No	No	Not Detected	N/A	1146	406	2.82266	3.53	0.26	1.92	1.83854	No	32.4219	No	No	No	No	No	No
140	6	Case	1	No	30-39	jun2020	jul2020	111	114	3	F	African	No	Asymptomatic	1	NEGATIVE															No	No	Not Detected	N/A	1029	433	2.37644	2.87	0.22	1.77	1.62147	No	32.4219	No	No	No	No	No	No
140	7	Case	1	No	30-39	jun2020	jul2020	208	211	3	F	African	No	Mild	2	NEGATIVE															No	No	Not Detected	N/A				3.31	0.26	2.02	1.63861	No	32.4219	No	No	No	No	No	No
140	8	Case	1	No	30-39	jun2020	jul2020	296	299	3	F	African	No	Asymptomatic	1	NEGATIVE															No	No	Not Detected	N/A	1157	446	2.59417	2.61	0.27	2.04	1.27941	No	32.4219	No	No	No	No	No	No
141	1	Case	1	No	20-29	jul2020	jul2020	7	11	4	F	African	No	Mild	3	NEGATIVE															No	No	Not Detected	N/A	654	442	1.47964	2.84	0.57	1.56	1.82051	No	38.856	No	No	No	No	No	No
141	2	Case	1	No	20-29	jul2020	jul2020	14	18	4	F	African	No	Asymptomatic	1	NEGATIVE															No	No	Not Detected	N/A	858	497	1.72636	4.27	0.74	1.99	2.14573	No	38.856	No	No	No	No	No	No
142	1	Case	1	No	40-49	jul2020	jul2020	13	18	5	F	African	No	Mild	3	POSITIVE	40	jun2012	Yes	<90	94.7	4910	0	0	0	<180	0	0	0	0	No	Yes	Not Detected	N/A	598	601	0.995008	1.86	0.28	1.36	1.36765	No	37.8906	No	No	No	No	No	No
142	2	Case	1	No	40-49	jul2020	jul2020	20	25	5	F	African	No	Mild	2	POSITIVE	40	jun2012	Yes	<90	116.7	4120	0	0	0	0	0	0	0	0	No	Yes	Inconclusive	N/A	519	513	1.0117	1.67	0.31	1.36	1.22794	No	37.8906	No	No	No	No	No	No
142	4	Case	1	No	40-49	jul2020	jul2020	36	41	5	F	African	No	Mild	2	POSITIVE	40	jun2012	No	0	0	0	0	0	0	0	0	0	0	0	No	Yes	Not Detected	N/A	501	555	0.902703	1.44	0.29	1.33	1.08271	No	37.8906	No	No	No	No	No	No
142	6	Case	1	No	40-49	jul2020	jul2020	107	112	5	F	African	No	Mild	2	POSITIVE	40	jun2012	Yes	<90	90.16	>5000	0	0	0	0	0	0	0	0	No	Yes	Not Detected	N/A	577	639	0.902973	1.45	0.26	1.44	1.00694	No	37.8906	No	No	No	No	No	No
142	7	Case	1	No	40-49	jul2020	jul2020	197	202	5	F	African	No	Mild	2	POSITIVE	40	jun2012	Yes	<90	138.19	4270	0	0	0	0	0	0	0	0	No	Yes	Not Detected	N/A	587	613	0.957586	1.46	0.27	1.45	1.0069	No	37.8906	No	No	No	No	No	No
142	8	Case	1	No	40-49	jul2020	jul2020	286	291	5	F	African	No	Asymptomatic	1	POSITIVE	40	jun2012													No	Yes	Not Detected	N/A	634	708	0.89548	1.46	0.23	1.67	0.874251	No	37.8906	No	No	No	No	No	No
143	1	Case	1	No	40-49	jul2020	jul2020	10	11	1	F	African	No	Mild	3	POSITIVE	40		Yes	0	0	0	0	0	0	<180	0	0	0	0	No	No	Not Detected	N/A	570	534	1.06742	9.17	0.89	2.13	4.30516	No	36.0648	No	No	No	No	No	No
143	2	Case	1	No	40-49	jul2020	jul2020	17	18	1	F	African	No	Mild	3	POSITIVE	40		Yes	<90	0	0	1460	0	0	0	<180	0	0	0	No	No	2Targets	>34.711274985	637	846	0.752955	10.1	0.88	2.15	4.69767	No	36.0648	No	No	No	No	No	No
143	3	Case	1	No	40-49	jul2020	jul2020	23	24	1	F	African	No	Mild	3	POSITIVE	40		No	0	0	0	0	0	0	0	0	0	0	0	No	No	2Targets	>33.601185275	1657	1114	1.48743	3.78	0.71	3.49	1.08309	No	36.0648	No	No	No	No	No	No
143	6	Case	1	No	40-49	jul2020	jul2020	102	103	1	F	African	No	Asymptomatic	1	POSITIVE	40		Yes	<90	0	0	1671.4	0	0	0	<180	0	0	0	No	No	Not Detected	N/A	1000	922	1.0846	4.66	0.4	2.19	2.12785	No	36.0648	No	No	No	No	No	No
143	7	Case	1	No	40-49	jul2020	jul2020	193	194	1	F	African	No	Mild	2	POSITIVE	40		Yes	<90	0	0	929.8	0	0	0	<180	0	0	0	No	No	Detected	34.21666667	1924	1406	1.36842	8.96	0.97	4.08	2.19608	No	36.0648	No	No	No	No	No	No
143	8	Case	1	No	40-49	jul2020	jul2020	283	284	1	F	African	No	Asymptomatic	1	POSITIVE	40														No	No	Not Detected	N/A	1788	1498	1.19359	4.89	0.62	3.78	1.29365	No	36.0648	No	No	No	No	No	No
144	1	Case	1	No	30-39	jul2020	jul2020	8			M	African		Asymptomatic	1	POSITIVE	40	jul2019	Yes	0	21.4	964	0	0	0	0	0	0	0	0	No	No	Detected	28.87474249666667	585	1013	0.577493	0.99	0.51	2.23	0.443946	No	27.102	No	No	No	No	No	No
144	2	Case	1	No	30-39	jul2020	jul2020	15			M	African		Asymptomatic	1	POSITIVE	40	jul2019	Yes	<90	120.8	<150	0	0	0	0	0	0	0	0	No	No	Not Detected	N/A	487	644	0.756211	1.3	0.32	1.55	0.83871	No	27.102	No	No	No	No	No	No
144	4	Case	1	No	30-39	jul2020	jul2020	29			M	African		Mild	2	POSITIVE	40	jul2019	Yes	0	<20	<150	0	0	0	0	0	0	0	0	No	No	Not Detected	N/A	634	876	0.723744	1.25	0.37	1.96	0.637755	No	27.102	No	No	No	No	No	No
144	7	Case	1	No	30-39	jul2020	jul2020	194			M	African		Mild	2	POSITIVE	40	jul2019	Yes	0	0	0	1620.8	0	0	0	<180	0	0	0	No	No	Not Detected	N/A	506	844	0.599526	1.13	0.34	1.9	0.594737	No	27.102	No	No	No	No	No	No
145	1	Case	1	No	30-39	jul2020	jul2020	8			M	African		Asymptomatic	1	NEGATIVE															No	No	Detected	26.73501223666667	589	495	1.1899	1.85	0.47	1.87	0.989305	No	41.1765	No	No	No	No	No	No
145	5	Case	1	No	30-39	jul2020	jul2020	36			M	African		Asymptomatic	1	NEGATIVE															No	No	Inconclusive	N/A	781	579	1.34888	4.16	0.44	1.91	2.17801	No	41.1765	No	No	No	No	No	No
145	6	Case	1	No	30-39	jul2020	jul2020	99			M	African		Asymptomatic	1	NEGATIVE															No	No	Not Detected	N/A	841	480	1.75208	3.79	0.47	1.8	2.10556	No	41.1765	No	No	No	No	No	No
145	7	Case	1	No	30-39	jul2020	jul2020	190			M	African		Mild	2	NEGATIVE															No	No	Detected	35.23666667	785	478	1.64226	2.94	0.4	1.85	1.58919	No	41.1765	No	No	No	No	No	No
146	1	Case	1	No	30-39	jul2020	jul2020	8			M	African		Asymptomatic	1	POSITIVE	40	jun2018	Yes	<90	69.5	786	0	0	0	0	0	0	0	0	No	No	Inconclusive	N/A	467	1117	0.418084	4.45	0.41	1.89	2.3545	No	30.3233	No	No	No	No	No	No
146	3	Case	1	No	30-39	jul2020	jul2020	21			M	African		Mild	2	POSITIVE	40	jun2018													No	No	Not Detected	N/A	668	1723	0.387696	4.98	0.74	3.05	1.63279	No	30.3233	No	No	No	No	No	No
146	5	Case	1	No	30-39	jul2020	jul2020	39			M	African		Asymptomatic	1	POSITIVE	40	jun2018	Yes	<90	92.1	1330	0	0	0	0	0	0	0	0	No	No	Inconclusive	N/A	484	1118	0.432916	3.49	0.4	1.87	1.86631	No	30.3233	No	No	No	No	No	No
146	7	Case	1	No	30-39	jul2020	jul2020	193			M	African		Asymptomatic	1	POSITIVE		jun2018	Yes	<90	30.39	696	402.8	0	0	0	<180	0	0	0	No	No	2Targets	>38.01	612	1248	0.490385	5.72	0.5	2.34	2.44444	No	30.3233	No	No	No	No	No	No
147	1	Case	1	No	30-39	jul2020	jul2020	12			F	African	No	Asymptomatic	1	NEGATIVE															No	No	Not Detected	N/A	877	545	1.60917	2.29	0.3	2.23	1.02691	No	26.0375	No	No	No	No	No	No
148	1	Case	1	No	20-29	jul2020	jul2020	3			F	African	No	Mild	3	NEGATIVE															No	No	Not Detected	N/A	568	403	1.40943	1.95	0.27	1.46	1.33562	No	22.9421	No	No	No	No	No	No
148	7	Case	1	No	20-29	jul2020	jul2020	185			F	African	No	Asymptomatic	1	NEGATIVE															No	No	Not Detected	N/A	481	327	1.47095	1.63	0.22	1.26	1.29365	No	22.9421	No	No	No	No	No	No
149	1	Case	1	No	20-29	jul2020	jul2020	9			F	African	No	Asymptomatic	1	NEGATIVE															No	No	Detected	22.90219501333333	728	551	1.32123	5.91	0.53	1.53	3.86275	No	25.4767	No	No	No	No	No	No
150	1	Case	1	No	20-29	jul2020	jul2020	4			F	African	No	Asymptomatic	1	NEGATIVE															No	No	Detected	29.50081433666666	884	412	2.14563	2.06	0.39	1.71	1.20468	No	25.3906	Yes	No	No	No	No	No
150	2	Case	1	No	20-29	jul2020	jul2020	12			F	African	No	Mild	2	NEGATIVE															No	No	Not Detected	N/A	911	410	2.22195	2.89	0.34	1.65	1.75152	No	25.3906	Yes	No	No	No	No	No
150	3	Case	1	No	20-29	jul2020	jul2020	19			F	African	No	Mild	2	NEGATIVE															No	No	Not Detected	N/A	929	406	2.28818	3.5	0.33	1.59	2.20126	No	25.3906	Yes	No	No	No	No	No
150	4	Case	1	No	20-29	jul2020	jul2020	25			F	African	No	Asymptomatic	1	NEGATIVE															No	No	Not Detected	N/A	838	379	2.21108	5.79	0.59	1.5	3.86	No	25.3906	Yes	No	No	No	No	No
150	5	Case	1	No	20-29	jul2020	jul2020	32			F	African	No	Asymptomatic	1	NEGATIVE															No	No	Not Detected	N/A	1063	502	2.11753	4.53	0.56	2.2	2.05909	No	25.3906	Yes	No	No	No	No	No
150	6	Case	1	No	20-29	jul2020	jul2020	95			F	African	No	Mild	2	NEGATIVE															No	No	Not Detected	N/A	1022	512	1.99609	3.93	0.38	1.85	2.12432	No	25.3906	Yes	No	No	No	No	No
151	1	Case	1	No	30-39	jul2020	jul2020	6	9	3	M	African		Supplemental Oxygen or Death	4	NEGATIVE															No	No	Not Detected	N/A	889	344	2.5843	2.09	0.48	1.77	1.18079	No	25.963	No	No	No	No	No	No
151	2	Case	1	No	30-39	jul2020	jul2020	13	16	3	M	African		Mild	2	NEGATIVE															No	No	Not Detected	N/A	841	356	2.36236	2.64	0.55	1.71	1.54386	No	25.963	No	No	No	No	No	No
151	3	Case	1	No	30-39	jul2020	jul2020	20	23	3	M	African		Mild	2	NEGATIVE															No	No	Not Detected	N/A	735	300	2.45	1.7	0.48	1.37	1.24088	No	25.963	No	No	No	No	No	No
151	4	Case	1	No	30-39	jul2020	jul2020	27	30	3	M	African		Mild	2	NEGATIVE															No	No	Not Detected	N/A	879	350	2.51143	1.27	0.53	1.46	0.869863	No	25.963	No	No	No	No	No	No
151	5	Case	1	No	30-39	jul2020	jul2020	34	37	3	M	African		Mild	2	NEGATIVE															No	No	Not Detected	N/A	683	309	2.21036	1.55	0.4	1.41	1.09929	No	25.963	No	No	No	No	No	No
151	6	Case	1	No	30-39	jul2020	jul2020	97	100	3	M	African		Mild	2	NEGATIVE															No	No	Not Detected	N/A	942	340	2.77059	1.31	0.36	1.54	0.850649	No	25.963	No	No	No	No	No	No
151	7	Case	1	No	30-39	jul2020	jul2020	188	191	3	M	African		Mild	2	NEGATIVE															No	No	Not Detected	N/A	731	308	2.37338	1.39	0.48	1.44	0.965278	No	25.963	No	No	No	No	No	No
152	1	Case	1	No	50-59	jul2020	jul2020	9	12	3	M	African		Supplemental Oxygen or Death	4	POSITIVE	40		Yes	0	0	<150	0	0	0	0	0	0	0	0	No	No	Not Detected	N/A	382	658	0.580547	9.62	0.4	1.37	7.0219	No	27.7769	No	Yes	No	No	No	No
152	2	Case	1	No	50-59	jul2020	jul2020	15	18	3	M	African		Supplemental Oxygen or Death	4	POSITIVE	40		Yes	0	0	204	0	0	0	0	<180	0	0	0	No	No	Not Detected	N/A	368	621	0.592593	5.31	0.3	1.29	4.11628	No	27.7769	No	Yes	No	No	No	No
152	6	Case	1	No	50-59	jul2020	jul2020	100	103	3	M	African		Asymptomatic	1	POSITIVE	40		Yes	0	0	2270	0	0	0	0	752.9	0	0	0	No	No	Not Detected	N/A	548	879	0.623436	3.53	0.31	1.73	2.04046	No	27.7769	No	Yes	No	No	No	No
152	7	Case	1	No	50-59	jul2020	jul2020	191	194	3	M	African		Mild	2	POSITIVE	40		Yes	0	0	1596.62	0	0	0	0	772.4	0	0	0	No	No	Not Detected	N/A	512	915	0.559563	3.45	0.33	1.77	1.94915	No	27.7769	No	Yes	No	No	No	No
153	1	Case	1	No	30-39	jul2020	aug2020	5	9	4	F	African	No	Supplemental Oxygen or Death	4	POSITIVE	40	jan2009	Yes	<90	64.8	884	0	0	0	0	0	0	0	0	No	No	Detected	30.63073233333334	913	768	1.1888	3.21	0.38	2.49	1.28916	No	31.6406	No	No	No	No	No	No
153	2	Case	1	No	30-39	jul2020	aug2020	11	15	4	F	African	No	Asymptomatic	1	POSITIVE	40	jan2009	Yes	<90	129.8	796	0	0	0	0	0	0	0	0	No	No	Not Detected	N/A	893	775	1.15226	2.64	0.31	2.32	1.13793	No	31.6406	No	No	No	No	No	No
153	3	Case	1	No	30-39	jul2020	aug2020	19	23	4	F	African	No	Asymptomatic	1	POSITIVE	40	jan2009	Yes	<90	146.8	938	0	0	0	0	0	0	0	0	No	No	Not Detected	N/A	989	898	1.10134	3.87	0.39	2.51	1.54183	No	31.6406	No	No	No	No	No	No
153	4	Case	1	No	30-39	jul2020	aug2020	27	31	4	F	African	No	Asymptomatic	1	POSITIVE	40	jan2009	Yes	<90	129.8	>5000	0	0	0	0	0	0	0	0	No	No	Not Detected	N/A	821	751	1.09321	3.65	0.42	2.03	1.79803	No	31.6406	No	No	No	No	No	No
153	5	Case	1	No	30-39	jul2020	aug2020	34	38	4	F	African	No	Asymptomatic	1	POSITIVE	40	jan2009	Yes	<90	110.8	4950	0	0	0	0	0	0	0	0	No	No	Not Detected	N/A	882	792	1.11364	2.95	0.47	2.47	1.19433	No	31.6406	No	No	No	No	No	No
153	6	Case	1	No	30-39	jul2020	aug2020	97	101	4	F	African	No	Asymptomatic	1	POSITIVE	40	jan2009	Yes	<90	130.46	>5000	0	0	0	0	0	0	0	0	No	No	Not Detected	N/A	804	744	1.08065	3.3	0.4	2.02	1.63366	No	31.6406	No	No	No	No	No	No
154	1	Case	1	No	70-79	jul2020	aug2020	18	4	-14	F	African	No	Supplemental Oxygen or Death	4	NEGATIVE															No	No	Not Detected	N/A	264	168	1.57143	16.6	1.03	0.92	18.0435	No	22.0317	Yes	No	No	No	No	No
154	2	Case	1	No	70-79	jul2020	aug2020	25	11	-14	F	African	No	Mild	3	NEGATIVE															No	No	Inconclusive	N/A	248	188	1.31915	11.75	0.43	0.98	11.9898	No	22.0317	Yes	No	No	No	No	No
154	7	Case	1	No	70-79	jul2020	aug2020	205	191	-14	F	African	No	Mild	2	NEGATIVE															No	No	Not Detected	N/A	774	393	1.96947	6.78	0.4	1.87	3.62567	No	22.0317	Yes	No	No	No	No	No
155	1	Case	1	No	30-39	jul2020	aug2020	6	10	4	F	African	No	Supplemental Oxygen or Death	4	NEGATIVE															No	No	Detected	30.80535443333333	592	706	0.838527	6.27	0.56	1.68	3.73214	No	35.1562	No	No	No	No	No	No
155	2	Case	1	No	30-39	jul2020	aug2020	12	16	4	F	African	No	Asymptomatic	1	NEGATIVE															No	No	Not Detected	N/A	894	854	1.04684	5.69	0.49	1.93	2.94819	No	35.1562	No	No	No	No	No	No
155	3	Case	1	No	30-39	jul2020	aug2020	20	24	4	F	African	No	Asymptomatic	1	NEGATIVE															No	No	Not Detected	N/A	1103	913	1.20811	7.9	0.83	2.77	2.85199	No	35.1562	No	No	No	No	No	No
155	4	Case	1	No	30-39	jul2020	aug2020	27	31	4	F	African	No	Asymptomatic	1	NEGATIVE															No	No	Not Detected	N/A	903	785	1.15032	2.31	0.21	1.43	1.61538	No	35.1562	No	No	No	No	No	No
156	1	Case	1	No	40-49	jul2020	aug2020	16	19	3	F	African	No	Supplemental Oxygen or Death	4	NEGATIVE															No	Yes	Not Detected	N/A	440	369	1.19241	8.05	0.34	1.61	5	No	37.324	No	No	No	No	No	No
156	2	Case	1	No	40-49	jul2020	aug2020	23	26	3	F	African	No	Asymptomatic	1	NEGATIVE															No	Yes	Not Detected	N/A	824	521	1.58157	3.75	0.29	1.84	2.03804	No	37.324	No	No	No	No	No	No
156	4	Case	1	No	40-49	jul2020	aug2020	37	40	3	F	African	No	Mild	2	NEGATIVE															No	Yes	Not Detected	N/A	680	415	1.63855	3.77	0.57	1.93	1.95337	No	37.324	No	No	No	No	No	No
156	5	Case	1	No	40-49	jul2020	aug2020	44	47	3	F	African	No	Asymptomatic	1	NEGATIVE															No	Yes	Not Detected	N/A	734	456	1.60965	1.9	0.24	1.75	1.08571	No	37.324	No	No	No	No	No	No
156	6	Case	1	No	40-49	jul2020	aug2020	113	116	3	F	African	No	Asymptomatic	1	NEGATIVE															No	Yes	Not Detected	N/A	801	555	1.44324	2.23	0.24	1.84	1.21196	No	37.324	No	No	No	No	No	No
156	7	Case	1	No	40-49	jul2020	aug2020	213	216	3	F	African	No	Mild	2	NEGATIVE															No	Yes	Not Detected	N/A	802	587	1.36627	1.92	0.23	1.81	1.06077	No	37.324	No	No	No	No	No	No
157	1	Case	1	No	40-49	jul2020	aug2020	7	10	3	M	African		Supplemental Oxygen or Death	4	NEGATIVE															No	No	2Targets	>34.50498021	309	488	0.633197	6.56	0.22	1.14	5.75439	No	35.4922	No	Yes	No	No	No	No
157	2	Case	1	No	40-49	jul2020	aug2020	13	16	3	M	African		Mild	3	NEGATIVE															No	No	Not Detected	N/A	374	650	0.575385	10.94	0.54	1.65	6.6303	No	35.4922	No	Yes	No	No	No	No
157	3	Case	1	No	40-49	jul2020	aug2020	21	24	3	M	African		Mild	2	NEGATIVE															No	No	Not Detected	N/A	1078	623	1.73034	5.76	0.69	2.52	2.28571	No	35.4922	No	Yes	No	No	No	No
157	4	Case	1	No	40-49	jul2020	aug2020	28	31	3	M	African		Mild	2	NEGATIVE															No	No	Not Detected	N/A	953	1127	0.845608	3.47	0.49	2.55	1.36078	No	35.4922	No	Yes	No	No	No	No
157	5	Case	1	No	40-49	jul2020	aug2020	35	38	3	M	African		Asymptomatic	1	NEGATIVE															No	No	Not Detected	N/A	856	646	1.32508	3.09	0.42	2.25	1.37333	No	35.4922	No	Yes	No	No	No	No
157	6	Case	1	No	40-49	jul2020	aug2020	96	99	3	M	African		Asymptomatic	1	NEGATIVE															No	No	Not Detected	N/A	1014	953	1.06401	3.46	0.37	2.32	1.49138	No	35.4922	No	Yes	No	No	No	No
157	7	Case	1	No	40-49	jul2020	aug2020	189	192	3	M	African		Asymptomatic	1	NEGATIVE															No	No	Not Detected	N/A	1105	1135	0.973568	3.38	0.61	3.03	1.11551	No	35.4922	No	Yes	No	No	No	No
158	1	Case	1	No	40-49	jul2020	aug2020	9	16	7	M	African		Mild	3	NEGATIVE															No	No	Detected	34.31484657000001	910	664	1.37048	3.56	0.6	2.61	1.36398	No	21.6788	No	No	No	No	No	No
158	2	Case	1	No	40-49	jul2020	aug2020	16	23	7	M	African		Mild	2	NEGATIVE															No	No	Not Detected	N/A	617	436	1.41514	3.05	0.49	1.62	1.88272	No	21.6788	No	No	No	No	No	No
158	3	Case	1	No	40-49	jul2020	aug2020	23	30	7	M	African		Asymptomatic	1	NEGATIVE															No	No	Not Detected	N/A	514	486	1.05761	2.25	0.36	1.77	1.27119	No	21.6788	No	No	No	No	No	No
158	4	Case	1	No	40-49	jul2020	aug2020	30	37	7	M	African		Mild	2	NEGATIVE															No	No	Not Detected	N/A	572	350	1.63429	3.8	0.61	1.27	2.99213	No	21.6788	No	No	No	No	No	No
158	5	Case	1	No	40-49	jul2020	aug2020	41	48	7	M	African		Mild	2	NEGATIVE															No	No	Not Detected	N/A	621	569	1.09139	2.29	0.3	1.99	1.15075	No	21.6788	No	No	No	No	No	No
158	6	Case	1	No	40-49	jul2020	aug2020	98	105	7	M	African		Asymptomatic	1	NEGATIVE															No	No	Not Detected	N/A	494	550	0.898182	5.82	0.5	1.53	3.80392	No	21.6788	No	No	No	No	No	No
158	7	Case	1	No	40-49	jul2020	aug2020	199	206	7	M	African		Mild	2	NEGATIVE															No	No	Not Detected	N/A	669	503	1.33002	3.01	0.4	1.87	1.60963	No	21.6788	No	No	No	No	No	No
159	1	Case	1	No	20-29	jul2020	aug2020	8	9	1	M	African		Supplemental Oxygen or Death	4	POSITIVE	164	jul2005	Yes	0	0	0	0	0	0	0	<180	0	0	0	No	Yes	Not Detected	N/A	274	1462	0.187414	1.45	0.34	2.55	0.568627	No	24.0882	No	No	No	No	No	No
159	2	Case	1	No	20-29	jul2020	aug2020	15	16	1	M	African		Asymptomatic	1	POSITIVE	118	jul2005	Yes	0	0	0	0	0	0	0	919.3	>6000	567.2	0	No	Yes	Not Detected	N/A	187	1073	0.174278	3.43	0.44	2.02	1.69802	No	24.0882	No	No	No	No	No	No
159	3	Case	1	No	20-29	jul2020	aug2020	22	23	1	M	African		Mild	2	POSITIVE	187	jul2005	Yes	0	0	0	0	0	0	0	700.3	>6000	1019.2	0	No	Yes	Not Detected	N/A	143	977	0.146366	2.53	0.24	1.57	1.61146	No	24.0882	No	No	No	No	No	No
159	4	Case	1	No	20-29	jul2020	aug2020	29	30	1	M	African		Mild	2	POSITIVE	191	jul2005	Yes	0	0	0	0	0	0	0	1087.3	>6000	902.2	0	No	Yes	Not Detected	N/A	263	1505	0.174751	1.43	0.4	2.6	0.55	No	24.0882	No	No	No	No	No	No
159	5	Case	1	No	20-29	jul2020	aug2020	36	37	1	M	African		Asymptomatic	1	POSITIVE	100	jul2005	Yes	0	0	0	0	0	0	0	424.3	5650	450.2	0	No	Yes	Not Detected	N/A	218	1017	0.214356	1.96	0.35	2.27	0.863436	No	24.0882	No	No	No	No	No	No
159	6	Case	1	No	20-29	jul2020	aug2020	100	101	1	M	African		Asymptomatic	1	POSITIVE	921	jul2005	Yes	0	0	0	0	0	0	0	598.9	0	1052.9	0	No	Yes	Not Detected	N/A	276	1222	0.225859	1.44	0.48	2.09	0.688995	No	24.0882	No	No	No	No	No	No
159	7	Case	1	No	20-29	jul2020	aug2020	195	196	1	M	African		Mild	2	POSITIVE	40	jul2005	Yes	0	0	0	0	0	0	0	<180	4090	<180	0	No	Yes	Not Detected	N/A	310	1095	0.283105	1.87	0.33	2	0.935	No	24.0882	No	No	No	No	No	No
160	1	Case	1	No	20-29	jul2020	aug2020	17	30	13	M	African		Mild	3	NEGATIVE															No	No	Not Detected	N/A	1294	787	1.64422	3.25	0.4	3.2	1.01562	No	27.4348	No	No	No	No	No	No
160	2	Case	1	No	20-29	jul2020	aug2020	24	37	13	M	African		Mild	2	NEGATIVE															No	No	Not Detected	N/A	1392	705	1.97447	4.3	0.52	3.08	1.3961	No	27.4348	No	No	No	No	No	No
160	3	Case	1	No	20-29	jul2020	aug2020	31	44	13	M	African		Asymptomatic	1	NEGATIVE															No	No	Inconclusive	N/A	1139	620	1.8371	2.4	0.35	2.53	0.948617	No	27.4348	No	No	No	No	No	No
160	4	Case	1	No	20-29	jul2020	aug2020	38	51	13	M	African		Mild	2	NEGATIVE															No	No	Not Detected	N/A	1402	706	1.98584	2.95	0.37	2.62	1.12595	No	27.4348	No	No	No	No	No	No
160	5	Case	1	No	20-29	jul2020	aug2020	45	58	13	M	African		Mild	2	NEGATIVE															No	No	Not Detected	N/A	810	500	1.62	4.27	0.52	1.78	2.39888	No	27.4348	No	No	No	No	No	No
160	6	Case	1	No	20-29	jul2020	aug2020	107	120	13	M	African		Asymptomatic	1	NEGATIVE															No	No	Not Detected	N/A	1176	660	1.78182	2.2	0.38	2.5	0.88	No	27.4348	No	No	No	No	No	No
160	7	Case	1	No	20-29	jul2020	aug2020	199	212	13	M	African		Mild	2	NEGATIVE															No	No	Not Detected	N/A	1070	509	2.10216	2.57	0.36	2.29	1.12227	No	27.4348	No	No	No	No	No	No
161	1	Case	1	No	20-29	jul2020	aug2020	8	10	2	F	African	Yes	Supplemental Oxygen or Death	4	POSITIVE	40	mar2020	Yes	<90	115.8	<150	0	0	0	0	0	0	0	0	No	No	2Targets	>36.55383943	612	467	1.31049	2.63	0.2	1.23	2.13821	No		No	No	No	No	No	No
161	4	Case	1	No	20-29	jul2020	aug2020	29	31	2	F	African	No	Asymptomatic	1	POSITIVE	40	mar2020	Yes	<90	137.8	1330	0	0	0	0	0	0	0	0	No	No	Not Detected	N/A	872	641	1.36037	4.14	0.24	1.81	2.28729	No	19.5312	No	No	No	No	No	No
161	5	Case	1	No	20-29	jul2020	aug2020	36	38	2	F	African	No	Asymptomatic	1	POSITIVE	40	mar2020	Yes	<90	161.8	2090	0	0	0	0	0	0	0	0	No	No	Inconclusive	N/A	1069	791	1.35145	3.11	0.27	2.11	1.47393	No	19.5312	No	No	No	No	No	No
161	6	Case	1	No	20-29	jul2020	aug2020	99	101	2	F	African	No	Asymptomatic	1	POSITIVE	40	mar2020	Yes	<90	154.46	1750	0	0	0	0	0	0	0	0	No	No	Not Detected	N/A	1120	840	1.33333	3.98	0.35	2.12	1.87736	No	19.5312	No	No	No	No	No	No
161	7	Case	1	No	20-29	jul2020	aug2020	197	199	2	F	African	No	Asymptomatic	1	POSITIVE	40	mar2020	Yes	<90	0	0	2259.9	0	0	0	<180	0	0	0	No	No	Not Detected	N/A	1003	760	1.31974	2.25	0.42	2.46	0.914634	No	19.5312	No	No	No	No	No	No
162	1	Case	1	No	30-39	aug2020	aug2020	4	7	3	F	African	No	Mild	3	NEGATIVE															No	No	Not Detected	N/A	1469	751	1.95606	4.72	0.41	2.59	1.82239	No	26.0262	No	No	No	No	No	No
162	2	Case	1	No	30-39	aug2020	aug2020	10	13	3	F	African	No	Asymptomatic	1	NEGATIVE															No	No	Inconclusive	N/A	1346	639	2.10642	6.46	0.43	2.38	2.71429	No	26.0262	No	No	No	No	No	No
163	1	Case	1	No	50-59	aug2020	aug2020	3	10	7	F	African	No	Supplemental Oxygen or Death	4	NEGATIVE															No	No	Not Detected	N/A	1112	401	2.77307	3.02	0.52	2.56	1.17969	No	27.2392	No	No	No	No	No	No
163	2	Case	1	No	50-59	aug2020	aug2020	10	17	7	F	African	No	Mild	3	NEGATIVE															No	No	Not Detected	N/A	1137	484	2.34917	3.81	0.46	2.5	1.524	No	27.2392	No	No	No	No	No	No
163	3	Case	1	No	50-59	aug2020	aug2020	17	24	7	F	African	No	Mild	2	NEGATIVE															No	No	Not Detected	N/A	888	382	2.32461	3.86	0.44	1.95	1.97949	No	27.2392	No	No	No	No	No	No
163	4	Case	1	No	50-59	aug2020	aug2020	24	31	7	F	African	No	Mild	2	NEGATIVE															No	No	Not Detected	N/A	1054	497	2.12072	3.09	0.43	2.33	1.32618	No	27.2392	No	No	No	No	No	No
163	5	Case	1	No	50-59	aug2020	aug2020	31	38	7	F	African	No	Mild	2	NEGATIVE															No	No	Not Detected	N/A	761	309	2.46278	3.2	0.23	1.74	1.83908	No	27.2392	No	No	No	No	No	No
163	6	Case	1	No	50-59	aug2020	aug2020	91	98	7	F	African	No	Mild	2	NEGATIVE															No	No	Not Detected	N/A	1063	454	2.34141	2.99	0.35	2.21	1.35294	No	27.2392	No	No	No	No	No	No
163	7	Case	1	No	50-59	aug2020	aug2020	190	197	7	F	African	No	Mild	2	NEGATIVE															No	No	Not Detected	N/A	1188	395	3.00759	3.31	0.36	2.27	1.45815	No	27.2392	No	No	No	No	No	No
164	1	Case	1	No	60-69	aug2020	aug2020	10	17	7	F	African	No	Supplemental Oxygen or Death	4	NEGATIVE															No	No	Inconclusive	N/A	338	160	2.1125	11.12	0.33	1.04	10.6923	No	36.1604	Yes	Yes	No	No	No	No
164	3	Case	1	No	60-69	aug2020	aug2020	24	31	7	F	African	No	Mild	2	NEGATIVE															No	No	Not Detected	N/A	1046	360	2.90556	4.48	0.56	1.97	2.27411	No	36.1604	Yes	Yes	No	No	No	No
164	5	Case	1	No	60-69	aug2020	aug2020	38	45	7	F	African	No	Mild	2	NEGATIVE															No	No	Not Detected	N/A	908	392	2.31633	4.56	0.45	2.07	2.2029	No	36.1604	Yes	Yes	No	No	No	No
164	6	Case	1	No	60-69	aug2020	aug2020	99	106	7	F	African	No	Mild	2	NEGATIVE															No	No	Not Detected	N/A	1281	423	3.02837	3.68	0.45	2.34	1.57265	No	36.1604	Yes	Yes	No	No	No	No
164	7	Case	1	No	60-69	aug2020	aug2020	198	205	7	F	African	No	Mild	2	NEGATIVE															No	No	Not Detected	N/A	1973	783	2.5198	6.86	0.73	4.42	1.55204	No	36.1604	Yes	Yes	No	No	No	No
165	1	Case	1	No	50-59	aug2020	aug2020	11	13	2	M	African		Mild	3	NEGATIVE															No	No	Not Detected	N/A	766	269	2.84758	5.5	0.8	1.62	3.39506	No	32.2421	Yes	No	No	No	No	No
165	2	Case	1	No	50-59	aug2020	aug2020	18	20	2	M	African		Mild	2	NEGATIVE															No	No	Not Detected	N/A	1010	392	2.57653	3.87	0.61	2.08	1.86058	No	32.2421	Yes	No	No	No	No	No
165	3	Case	1	No	50-59	aug2020	aug2020	25	27	2	M	African		Mild	2	NEGATIVE															No	No	Inconclusive	N/A	641	251	2.55378	2.75	0.48	1.3	2.11538	No	32.2421	Yes	No	No	No	No	No
165	4	Case	1	No	50-59	aug2020	aug2020	32	34	2	M	African		Mild	2	NEGATIVE															No	No	Not Detected	N/A	1183	445	2.65843	3.45	0.54	2.17	1.58986	No	32.2421	Yes	No	No	No	No	No
165	5	Case	1	No	50-59	aug2020	aug2020	39	41	2	M	African		Asymptomatic	1	NEGATIVE															No	No	Not Detected	N/A	781	367	2.12807	4.17	0.63	1.6	2.60625	No	32.2421	Yes	No	No	No	No	No
165	6	Case	1	No	50-59	aug2020	aug2020	95	97	2	M	African		Mild	2	NEGATIVE															No	No	Not Detected	N/A	994	508	1.95669	3.11	0.51	1.96	1.58673	No	32.2421	Yes	No	No	No	No	No
165	7	Case	1	No	50-59	aug2020	aug2020	193	195	2	M	African		Mild	2	NEGATIVE															No	No	Not Detected	N/A	1021	438	2.33105	3.44	0.6	2.15	1.6	No	32.2421	Yes	No	No	No	No	No
166	1	Case	1	No	60-69	aug2020	aug2020	12	19	7	M	African		Mild	3	NEGATIVE															No	No	Not Detected	N/A	1478	1695	0.871976	6.41	0.71	3.86	1.66062	No	20.83	No	No	No	No	No	No
166	2	Case	1	No	60-69	aug2020	aug2020	19	26	7	M	African		Asymptomatic	1	NEGATIVE															No	No	Not Detected	N/A	870	884	0.984163	11.11	0.72	2.26	4.91593	No	20.83	No	No	No	No	No	No
166	3	Case	1	No	60-69	aug2020	aug2020	26	33	7	M	African		Asymptomatic	1	NEGATIVE															No	No	Not Detected	N/A	793	755	1.05033	6.31	0.5	1.87	3.37433	No	20.83	No	No	No	No	No	No
166	4	Case	1	No	60-69	aug2020	aug2020	33	40	7	M	African		Asymptomatic	1	NEGATIVE															No	No	Not Detected	N/A	883	1087	0.812328	9.3	0.58	2.32	4.00862	No	20.83	No	No	No	No	No	No
167	1	Case	1	No	40-49	jul2020	aug2020	20	31	11	M	African		Mild	3	POSITIVE	40	jun2009	Yes	0	0	275	0	0	0	0	<180	0	0	0	No	No	Detected	30.52120451666667	715	1178	0.606961	2.37	0.62	2.37	1	No	29.0533	Yes	No	No	No	No	No
167	2	Case	1	No	40-49	jul2020	aug2020	27	38	11	M	African		Mild	2	POSITIVE	40	jun2009	Yes	0	0	1650	0	0	0	0	<180	0	0	0	No	No	Not Detected	N/A	763	1111	0.686769	2.14	0.46	2.41	0.887967	No	29.0533	Yes	No	No	No	No	No
167	3	Case	1	No	40-49	jul2020	aug2020	34	45	11	M	African		Asymptomatic	1	POSITIVE	40	jun2009	Yes	0	0	1530	0	0	0	0	<180	0	0	0	No	No	Not Detected	N/A	676	1081	0.625347	2.7	0.47	2.28	1.18421	No	29.0533	Yes	No	No	No	No	No
167	4	Case	1	No	40-49	jul2020	aug2020	41	52	11	M	African		Asymptomatic	1	POSITIVE	40	jun2009	Yes	0	0	230.2	0	0	0	<180	326.4	0	0	0	No	No	Not Detected	N/A	650	894	0.727069	3.56	0.49	1.92	1.85417	No	29.0533	Yes	No	No	No	No	No
167	5	Case	1	No	40-49	jul2020	aug2020	48	59	11	M	African		Asymptomatic	1	POSITIVE	40	jun2009	Yes	0	0	204.2	0	0	0	<180	<180	0	0	0	No	No	Not Detected	N/A	1189	1932	0.615424	3.29	0.56	3.59	0.916435	No	29.0533	Yes	No	No	No	No	No
167	6	Case	1	No	40-49	jul2020	aug2020	106	117	11	M	African		Asymptomatic	1	POSITIVE	68	jun2009	Yes	0	0	0	0	0	0	<180	0	0	0	0	No	No	Not Detected	N/A	989	1513	0.653668	3.63	0.54	2.62	1.3855	No	29.0533	Yes	No	No	No	No	No
167	7	Case	1	No	40-49	jul2020	aug2020	203	214	11	M	African		Asymptomatic	1	POSITIVE	40	jun2009	Yes	<90	0	0	3979.9	0	0	0	592.1	0	0	0	No	No	Not Detected	N/A	777	1340	0.579851	2.65	0.36	2.54	1.04331	No	29.0533	Yes	No	No	No	No	No
168	1	Case	1	No	50-59	aug2020	aug2020	3	11	8	M	African		Mild	3	NEGATIVE															No	No	Detected	27.54903126333333	889	780	1.13974	4.32	0.69	2.16	2	No	29.3878	Yes	No	No	No	No	No
168	3	Case	1	No	50-59	aug2020	aug2020	17	25	8	M	African		Asymptomatic	1	NEGATIVE															No	No	Not Detected	N/A	969	1094	0.88574	4.45	0.42	2.56	1.73828	No	29.3878	Yes	No	No	No	No	No
168	4	Case	1	No	50-59	aug2020	aug2020	24	32	8	M	African		Asymptomatic	1	NEGATIVE															No	No	Not Detected	N/A	776	961	0.807492	2.99	0.38	2.37	1.2616	No	29.3878	Yes	No	No	No	No	No
168	5	Case	1	No	50-59	aug2020	aug2020	31	39	8	M	African		Asymptomatic	1	NEGATIVE															No	No	Not Detected	N/A	1019	1167	0.873179	3.8	0.47	2.47	1.53846	No	29.3878	Yes	No	No	No	No	No
168	6	Case	1	No	50-59	aug2020	aug2020	88	96	8	M	African		Asymptomatic	1	NEGATIVE															No	No	Not Detected	N/A	1160	1671	0.694195	4.41	0.49	3.04	1.45066	No	29.3878	Yes	No	No	No	No	No
168	7	Case	1	No	50-59	aug2020	aug2020	185	193	8	M	African		Mild	2	NEGATIVE															No	No	Not Detected	N/A	866	1135	0.762996	3.41	0.37	2.33	1.46352	No	29.3878	Yes	No	No	No	No	No
169	1	Case	1	No	60-69	aug2020	aug2020	11	12	1	M	Indian		Mild	3	NEGATIVE															No	No	Detected	24.9426486133333	484	150	3.22667	4.11	0.63	0.99	4.15152	No	16.038	Yes	No	No	No	No	No
169	2	Case	1	No	60-69	aug2020	aug2020	18	19	1	M	Indian		Mild	2	NEGATIVE															No	No	Inconclusive	N/A	539	177	3.0452	5.59	0.84	1.19	4.69748	No	16.038	Yes	No	No	No	No	No
169	3	Case	1	No	60-69	aug2020	aug2020	25	26	1	M	Indian		Mild	2	NEGATIVE															No	No	Inconclusive	N/A	585	137	4.27007	5.2	0.47	1.17	4.44444	No	16.038	Yes	No	No	No	No	No
169	5	Case	1	No	60-69	aug2020	aug2020	39	40	1	M	Indian		Mild	2	NEGATIVE															No	No	Not Detected	N/A	618	135	4.57778	5.24	0.36	1.01	5.18812	No	16.038	Yes	No	No	No	No	No
169	6	Case	1	No	60-69	aug2020	aug2020	96	97	1	M	Indian		Mild	2	NEGATIVE															No	No	2Targets	>36.95	515	134	3.84328	5.36	0.49	0.93	5.76344	No	16.038	Yes	No	No	No	No	No
169	7	Case	1	No	60-69	aug2020	aug2020	194	195	1	M	Indian		Mild	2	NEGATIVE															No	No	Not Detected	N/A	530	170	3.11765	5.23	0.63	1.1	4.75455	No	16.038	Yes	No	No	No	No	No
170	1	Case	1	No	40-49	aug2020	aug2020	6	6	0	F	African	No	Supplemental Oxygen or Death	4	POSITIVE	40	sep2009	Yes	0	126	<150	0	0	0	0	0	0	0	0	No	No	Detected	34.22302256	306	216	1.41667	6.71	0.33	0.84	7.9881	No	22.0604	No	No	No	No	No	No
171	1	Case	1	No	50-59	jul2020	aug2020	18	24	6	F	African	No	Supplemental Oxygen or Death	4	POSITIVE	40	jun2008	Yes	<90	200	<150	0	0	0	0	0	0	0	0	No	Yes	Inconclusive	N/A	457	735	0.621769	5.77	0.54	1.93	2.98964	No	40.8983	No	No	No	No	No	No
171	2	Case	1	No	50-59	jul2020	aug2020	24	30	6	F	African	No	Mild	3	POSITIVE	40	jun2008													No	Yes	Not Detected	N/A								No	40.8983	No	No	No	No	No	No
171	3	Case	1	No	50-59	jul2020	aug2020	32	38	6	F	African	No	Mild	2	POSITIVE	40	jun2008	Yes	<90	274.8	770	0	0	0	0	0	0	0	0	No	Yes	Not Detected	N/A	957	1317	0.726651	4.41	0.67	3.15	1.4	No	40.8983	No	No	No	No	No	No
171	4	Case	1	No	50-59	jul2020	aug2020	39	45	6	F	African	No	Mild	2	POSITIVE	40	jun2008	Yes	<90	253	<150	0	0	0	0	0	0	0	0	No	Yes	Not Detected	N/A	809	1060	0.763208	3.57	0.44	2.54	1.40551	No	40.8983	No	No	No	No	No	No
171	5	Case	1	No	50-59	jul2020	aug2020	46	52	6	F	African	No	Mild	2	POSITIVE	40	jun2008	Yes	<90	302	<150	0	0	0	0	0	0	0	0	No	Yes	Not Detected	N/A	909	1211	0.750619	3.98	0.62	2.61	1.5249	No	40.8983	No	No	No	No	No	No
171	6	Case	1	No	50-59	jul2020	aug2020	105	111	6	F	African	No	Asymptomatic	1	POSITIVE		jun2008	Yes	<90	0	211	1310.8	0	0	0	377.3	0	0	0	No	Yes	Not Detected	N/A	912	1237	0.737268	2.9	0.54	2.72	1.06618	No	40.8983	No	No	No	No	No	No
172	1	Case	1	No	20-29	aug2020	aug2020	5	10	5	F	African	No	Mild	3	NEGATIVE															No	No	Not Detected	N/A	295	271	1.08856	12.18	0.29	1.34	9.08955	No	32.4622	No	No	No	No	No	No
172	2	Case	1	No	20-29	aug2020	aug2020	11	16	5	F	African	No	Mild	2	NEGATIVE															No	No	Not Detected	N/A	749	444	1.68694	2.96	0.39	1.96	1.5102	No	32.4622	No	No	No	No	No	No
172	6	Case	1	No	20-29	aug2020	aug2020	91	96	5	F	African	No	Mild	2	NEGATIVE															No	No	Detected	16.33	412	246	1.6748	2.85	0.74	1.12	2.54464	No	32.4622	No	No	No	No	No	No
172	7	Case	1	No	20-29	aug2020	aug2020	188	193	5	F	African	No	Asymptomatic	1	NEGATIVE															No	No	Not Detected	N/A	756	547	1.38208	2.7	0.52	2.07	1.30435	No	32.4622	No	No	No	No	No	No
173	1	Case	1	No	60-69	jul2020	aug2020	25	29	4	F	African	No	Supplemental Oxygen or Death	4	NEGATIVE															No	Yes	Detected	30.57639686666667	170	300	0.566667	8.22	0.28	0.88	9.34091	No	34.1311	Yes	Yes	No	No	No	No
173	4	Case	1	No	60-69	jul2020	aug2020	46	50	4	F	African	No	Mild	2	NEGATIVE															No	Yes	Not Detected	N/A	430	385	1.11688	13.67	0.95	1.26	10.8492	No	34.1311	Yes	Yes	No	No	No	No
174	1	Case	1	No	60-69	aug2020	aug2020	15	35	20	M	Coulored		Mild	3	NEGATIVE															No	No	Not Detected	N/A	578	268	2.15672	4.92	0.3	1.26	3.90476	Yes	23.0112	No	No	No	No	Yes	No
174	5	Case	1	No	60-69	aug2020	aug2020	43	63	20	M	Coulored		Asymptomatic	1	NEGATIVE															No	No	Not Detected	N/A	674	350	1.92571	4.85	0.47	1.64	2.95732	Yes	23.0112	No	No	No	No	Yes	No
174	6	Case	1	No	60-69	aug2020	aug2020	101	121	20	M	Coulored		Asymptomatic	1	NEGATIVE															No	No	Not Detected	N/A	708	337	2.10089	4.56	0.54	1.61	2.8323	Yes	23.0112	No	No	No	No	Yes	No
174	7	Case	1	No	60-69	aug2020	aug2020	197	217	20	M	Coulored		Asymptomatic	1	NEGATIVE															No	No	Not Detected	N/A	688	317	2.17035	3.65	0.48	1.38	2.64493	Yes	23.0112	No	No	No	No	Yes	No
175	1	Case	1	No	40-49	aug2020	aug2020	10	23	13	M	African		Supplemental Oxygen or Death	4	POSITIVE	40	nov2017	Yes	0	0	273.2	0	0	0	<180	<180	0	0	0	No	Yes	Not Detected	N/A	121	529	0.228733	9	0.58	0.86	10.4651	No	20.83	No	No	No	No	No	No
176	1	Case	1	No	40-49	aug2020	aug2020	11	15	4	F	African	No	Mild	3	POSITIVE	40	apr2008	Yes	<90	135	256.2	0	0	0	0	0	0	0	0	No	No	Inconclusive	N/A	702	817	0.859241	2.39	0.39	1.86	1.28495	No	33.9125	No	Yes	No	No	No	Yes
176	2	Case	1	No	40-49	aug2020	aug2020	18	22	4	F	African	No	Mild	2	POSITIVE	40	apr2008	Yes	<90	0	1370	797	0	0	0	262.3	0	0	0	No	No	Not Detected	N/A	723	868	0.832949	1.85	0.3	1.75	1.05714	No	33.9125	No	Yes	No	No	No	Yes
176	3	Case	1	No	40-49	aug2020	aug2020	25	29	4	F	African	No	Mild	2	POSITIVE	40	apr2008	Yes	<90	0	335	1610	0	0	0	235.3	0	0	0	No	No	Not Detected	N/A	796	1027	0.775073	1.65	0.31	2.06	0.800971	No	33.9125	No	Yes	No	No	No	Yes
176	4	Case	1	No	40-49	aug2020	aug2020	32	36	4	F	African	No	Mild	2	POSITIVE	40	apr2008	Yes	0	22.1	<150	0	0	0	0	0	0	0	0	No	No	Inconclusive	N/A	771	1111	0.693969	1.65	0.31	2.16	0.763889	No	33.9125	No	Yes	No	No	No	Yes
176	5	Case	1	No	40-49	aug2020	aug2020	39	43	4	F	African	No	Mild	2	POSITIVE	40	apr2008	Yes	<90	237	258.2	0	0	0	0	0	0	0	0	No	No	Not Detected	N/A	623	793	0.785624	1.89	0.24	1.59	1.18868	No	33.9125	No	Yes	No	No	No	Yes
176	6	Case	1	No	40-49	aug2020	aug2020	100	104	4	F	African	No	Mild	2	POSITIVE	40	apr2008	Yes	<90	117.19	2050	0	0	0	0	0	0	0	0	No	No	Not Detected	N/A	730	896	0.814732	1.39	0.22	1.68	0.827381	No	33.9125	No	Yes	No	No	No	Yes
176	7	Case	1	No	40-49	aug2020	aug2020	193	197	4	F	African	No	Mild	2	POSITIVE	40	apr2008	Yes	<90	0	0	2009.9	0	0	0	<180	0	0	0	No	No	Not Detected	N/A	888	1400	0.634286	1.68	0.26	2.67	0.629214	No	33.9125	No	Yes	No	No	No	Yes
177	1	Case	1	No	40-49	aug2020	aug2020	3	9	6	F	African	No	Supplemental Oxygen or Death	4	POSITIVE	1008		No	0	0	0	0	0	0	0	0	0	0	0	No	No	Not Detected	N/A	472	767	0.615385	0.72	0.33	1.65	0.436364	No	63.9153	No	No	No	No	No	No
177	2	Case	1	No	40-49	aug2020	aug2020	10	16	6	F	African	No	Asymptomatic	1	POSITIVE	4345		No	0	0	0	0	0	0	0	0	0	0	0	No	No	Not Detected	N/A	582	771	0.754864	2.12	0.35	1.51	1.40397	No	63.9153	No	No	No	No	No	No
177	5	Case	1	No	40-49	aug2020	aug2020	32	38	6	F	African	No	Asymptomatic	1	POSITIVE	17034		No	0	0	0	0	0	0	0	0	0	0	0	No	No	Not Detected	N/A	1154	889	1.29809	3.73	0.31	2.85	1.30877	No	63.9153	No	No	No	No	No	No
177	6	Case	1	No	40-49	aug2020	aug2020	92	98	6	F	African	No	Asymptomatic	1	POSITIVE	1521		No	0	0	0	0	0	0	0	0	0	0	0	No	No	Not Detected	N/A	776	381	2.03675	2.71	0.29	1.82	1.48901	No	63.9153	No	No	No	No	No	No
177	7	Case	1	No	40-49	aug2020	aug2020	189	195	6	F	African	No	Asymptomatic	1	POSITIVE	1224		No	0	0	0	0	0	0	0	0	0	0	0	No	No	Not Detected	N/A	478	694	0.688761	1.33	0.35	1.41	0.943262	No	63.9153	No	No	No	No	No	No
178	1	Case	1	No	60-69	aug2020	aug2020	18	18	0	F	African	No	Supplemental Oxygen or Death	4	NEGATIVE															No	No	Inconclusive	N/A	225	89	2.52809	5.76	0.4	0.46	12.5217	No	24.2188	Yes	Yes	Yes	No	No	No
178	2	Case	1	No	60-69	aug2020	aug2020	25	25	0	F	African	No	Supplemental Oxygen or Death	4	NEGATIVE															No	No	Not Detected	N/A	345	113	3.0531	7.13	0.41	0.58	12.2931	No	24.2188	Yes	Yes	Yes	No	No	No
178	4	Case	1	No	60-69	aug2020	aug2020	39	39	0	F	African	No	Supplemental Oxygen or Death	4	NEGATIVE															No	No	Not Detected	N/A	326	137	2.37956	4.04	0.44	0.75	5.38667	No	24.2188	Yes	Yes	Yes	No	No	No
178	5	Case	1	No	60-69	aug2020	aug2020	46	46	0	F	African	No	Supplemental Oxygen or Death	4	NEGATIVE															No	No	Not Detected	N/A	423	175	2.41714	4.29	0.38	0.7	6.12857	No	24.2188	Yes	Yes	Yes	No	No	No
178	6	Case	1	Yes	60-69	aug2020	aug2020	107	107	0	F	African	No	Supplemental Oxygen or Death	4	NEGATIVE															No	No										No	24.2188	Yes	Yes	Yes	No	No	No
178	7	Case	1	Yes	60-69	aug2020	aug2020	181	181	0	F	African	No	Supplemental Oxygen or Death	8	NEGATIVE															No	No										No	24.2188	Yes	Yes	Yes	No	No	No
179	1	Case	1	No	30-39	aug2020	aug2020	7	10	3	F	African	No	Supplemental Oxygen or Death	4	NEGATIVE															No	No	Inconclusive	N/A	569	583	0.975986	4.78	0.31	1.57	3.04459	No	45.9137	No	No	No	No	No	No
179	4	Case	1	No	30-39	aug2020	aug2020	28	31	3	F	African	No	Asymptomatic	1	NEGATIVE															No	No	Not Detected	N/A	886	708	1.25141	1.89	0.37	1.83	1.03279	No	45.9137	No	No	No	No	No	No
179	6	Case	1	No	30-39	aug2020	aug2020	98	101	3	F	African	No	Asymptomatic	1	NEGATIVE															No	No	Not Detected	N/A	1101	1017	1.0826	1.59	0.32	2.4	0.6625	No	45.9137	No	No	No	No	No	No
179	7	Case	1	No	30-39	aug2020	aug2020	196	199	3	F	African	No	Asymptomatic	1	NEGATIVE															No	No	Not Detected	N/A	859	592	1.45101	1.67	0.23	1.83	0.912568	No	45.9137	No	No	No	No	No	No
180	1	Case	1	No	40-49	aug2020	aug2020	11	15	4	F	African	No	Mild	3	POSITIVE	40	mar2008	Yes	<90	63.5	1080	0	0	0	0	0	0	0	0	No	No	Inconclusive	N/A	618	241	2.56432	3.1	0.34	1.36	2.27941	No	42.517	No	No	No	No	No	No
180	3	Case	1	No	40-49	aug2020	aug2020	25	29	4	F	African	No	Mild	2	POSITIVE	40	mar2008	Yes	<90	113.8	1770	0	0	0	0	0	0	0	0	No	No	Not Detected	N/A	547	182	3.00549	2.44	0.26	1.17	2.08547	No	42.517	No	No	No	No	No	No
180	4	Case	1	No	40-49	aug2020	aug2020	32	36	4	F	African	No	Mild	2	POSITIVE	40	mar2008	Yes	0	<20	195.2	0	0	0	0	0	0	0	0	No	No	Not Detected	N/A	707	258	2.74031	2.87	0.33	1.47	1.95238	No	42.517	No	No	No	No	No	No
180	6	Case	1	No	40-49	aug2020	aug2020	105	109	4	F	African	No	Mild	2	POSITIVE	40	mar2008	Yes	<90	0	1180	219.8	0	0	0	<180	0	0	0	No	No	Not Detected	N/A	801	297	2.69697	2.54	0.25	1.54	1.64935	No	42.517	No	No	No	No	No	No
180	7	Case	1	No	40-49	aug2020	aug2020	199	203	4	F	African	No	Mild	2	POSITIVE	40	mar2008	Yes	<90	0	<150	3119.9	0	0	0	183.1	0	0	0	No	No	Not Detected	N/A	618	222	2.78378	3.24	0.39	1.13	2.86726	No	42.517	No	No	No	No	No	No
181	1	Case	1	No	30-39	aug2020	aug2020	17	23	6	F	African	No	Mild	3	POSITIVE	40	aug2000	Yes	<90	0	0	2270	0	0	0	182.3	0	0	0	No	Yes	Inconclusive	N/A	1256	1186	1.05902	6.19	0.85	2.93	2.11263	No	32.9879	No	No	No	No	No	No
181	2	Case	1	No	30-39	aug2020	aug2020	24	30	6	F	African	No	Mild	2	POSITIVE	40	aug2000	Yes	<90	0	0	3170	0	0	0	<180	0	0	0	No	Yes	Not Detected	N/A	586	852	0.687793	6.05	0.59	1.89	3.20106	No	32.9879	No	No	No	No	No	No
181	3	Case	1	No	30-39	aug2020	aug2020	31	37	6	F	African	No	Mild	2	POSITIVE	40	aug2000	Yes	<90	0	0	3180	0	0	0	<180	0	0	0	No	Yes	Not Detected	N/A	616	1051	0.586108	3.29	0.54	2.06	1.59709	No	32.9879	No	No	No	No	No	No
181	4	Case	1	No	30-39	aug2020	aug2020	38	44	6	F	African	No	Asymptomatic	1	POSITIVE	40	aug2000	Yes	<90	0	0	4165.6	0	0	0	<180	0	0	0	No	Yes	Not Detected	N/A	704	963	0.731049	3.47	0.52	1.97	1.76142	No	32.9879	No	No	No	No	No	No
181	5	Case	1	No	30-39	aug2020	aug2020	45	51	6	F	African	No	Asymptomatic	1	POSITIVE	40	aug2000	Yes	<90	107	<150	229.6	0	0	0	0	0	0	0	No	Yes	Not Detected	N/A	626	913	0.685652	5.84	0.72	2.06	2.83495	No	32.9879	No	No	No	No	No	No
181	7	Case	1	No	30-39	aug2020	aug2020	203	209	6	F	African	No	Mild	2	POSITIVE	40	aug2000	Yes	<90	101.5	2863.7	0	0	0	0	0	0	0	0	No	Yes	Not Detected	N/A	746	843	0.884935	6.68	0.59	2.02	3.30693	No	32.9879	No	No	No	No	No	No
182	1	Case	1	No	50-59	jul2020	aug2020	24	45	21	F	African	No	Mild	3	NEGATIVE															No	No	Not Detected	N/A	1902	643	2.95801	2.21	0.63	3.39	0.651917	No	28.306	Yes	Yes	No	No	No	Yes
182	2	Case	1	No	50-59	jul2020	aug2020	31	52	21	F	African	No	Asymptomatic	1	NEGATIVE															No	No	Not Detected	N/A	1845	672	2.74554	2.49	0.53	3.35	0.743284	No	28.306	Yes	Yes	No	No	No	Yes
182	3	Case	1	No	50-59	jul2020	aug2020	38	59	21	F	African	No	Mild	2	NEGATIVE															No	No	Not Detected	N/A	1572	617	2.54781	2.15	0.6	2.74	0.784672	No	28.306	Yes	Yes	No	No	No	Yes
182	5	Case	1	No	50-59	jul2020	aug2020	52	73	21	F	African	No	Mild	2	NEGATIVE															No	No	Not Detected	N/A	2154	808	2.66584	1.64	0.57	3.65	0.449315	No	28.306	Yes	Yes	No	No	No	Yes
182	6	Case	1	No	50-59	jul2020	aug2020	122	143	21	F	African	No	Mild	2	NEGATIVE															No	No	Not Detected	N/A	2003	656	3.05335	1.75	0.39	3.06	0.571895	No	28.306	Yes	Yes	No	No	No	Yes
182	7	Case	1	No	50-59	jul2020	aug2020	208	229	21	F	African	No	Mild	2	NEGATIVE															No	No	Not Detected	N/A	3053	696	4.38649	2.3	0.6	4.51	0.509978	No	28.306	Yes	Yes	No	No	No	Yes
183	1	Case	1	No	50-59	jul2020	aug2020	35	38	3	F	African	No	Supplemental Oxygen or Death	4	POSITIVE	40	jun2005	Yes	<90	282.8	1600	0	0	0	0	0	0	0	0	No	Yes	Not Detected	N/A	803	362	2.21823	9.96	0.83	2.19	4.54795	No	29.7442	Yes	No	No	No	No	No
183	2	Case	1	No	50-59	jul2020	aug2020	42	45	3	F	African	No	Supplemental Oxygen or Death	4	POSITIVE	40	jun2005	Yes	<90	203.8	2790	0	0	0	0	0	0	0	0	No	Yes	Not Detected	N/A	1222	597	2.0469	6.36	0.84	3	2.12	No	29.7442	Yes	No	No	No	No	No
183	3	Case	1	No	50-59	jul2020	aug2020	49	52	3	F	African	No	Asymptomatic	1	POSITIVE	40	jun2005	Yes	<90	336	267.2	0	0	0	0	0	0	0	0	No	Yes	Not Detected	N/A	750	434	1.72811	8.17	0.6	2.03	4.02463	No	29.7442	Yes	No	No	No	No	No
183	4	Case	1	No	50-59	jul2020	aug2020	56	59	3	F	African	No	Mild	2	POSITIVE	40	jun2005	Yes	<90	387	327.2	0	0	0	0	0	0	0	0	No	Yes	Not Detected	N/A	1208	779	1.55071	6.07	0.81	3.14	1.93312	No	29.7442	Yes	No	No	No	No	No
183	5	Case	1	No	50-59	jul2020	aug2020	63	66	3	F	African	No	Supplemental Oxygen or Death	4	POSITIVE	40	jun2005	Yes	<90	171	266.2	0	0	0	0	0	0	0	0	No	Yes	Not Detected	N/A	1445	792	1.82449	5.78	0.72	3.28	1.7622	No	29.7442	Yes	No	No	No	No	No
183	6	Case	1	No	50-59	jul2020	aug2020	123	126	3	F	African	No	Mild	2	POSITIVE	40	jun2005	Yes	<90	160.19	2450	0	0	0	0	0	0	0	0	No	Yes	Not Detected	N/A	255	218	1.16972	4.56	0.43	1.04	4.38462	No	29.7442	Yes	No	No	No	No	No
183	7	Case	1	No	50-59	jul2020	aug2020	217	220	3	F	African	No	Mild	2	POSITIVE	40	jun2005	Yes	<90	<20	1783.7	180.9	0	0	0	<180	0	0	0	No	Yes	Not Detected	N/A	425	320	1.32812	6.72	0.21	1.24	5.41935	No	29.7442	Yes	No	No	No	No	No
184	1	Case	1	No	60-69	jul2020	aug2020	40	43	3	F	Indian	No	Supplemental Oxygen or Death	4	NEGATIVE															No	No	Not Detected	N/A	575	339	1.69617	10.71	0.87	1.48	7.23649	No	24.6548	Yes	Yes	No	Yes	No	No
184	3	Case	1	No	60-69	jul2020	aug2020	54	57	3	F	Indian	No	Mild	2	NEGATIVE															No	No	Inconclusive	N/A	411	309	1.3301	14.75	1.25	1.43	10.3147	No	24.6548	Yes	Yes	No	Yes	No	No
184	5	Case	1	Yes	60-69	jul2020	aug2020	67	70	3	F	Indian	No	Mild	2	NEGATIVE															No	No										No	24.6548	Yes	Yes	No	Yes	No	No
185	1	Case	1	No	30-39	aug2020	aug2020	8	16	8	F	African	No	Mild	3	POSITIVE	40		Yes	0	0	0	0	0	0	0	506.3	>6000	528.2	0	No	No	Not Detected	N/A	571	1130	0.50531	1.58	0.37	2.74	0.576642	No	29.4107	No	No	No	No	No	No
185	2	Case	1	No	30-39	aug2020	aug2020	15	23	8	F	African	No	Mild	2	POSITIVE	40		No	0	0	0	0	0	0	0	0	0	0	0	No	No	Not Detected	N/A	478	1185	0.403376	2.27	0.35	2.4	0.945833	No	29.4107	No	No	No	No	No	No
185	3	Case	1	No	30-39	aug2020	aug2020	22	30	8	F	African	No	Mild	2	POSITIVE	40		Yes	0	0	0	0	0	0	0	<180	4100	<180	0	No	No	Not Detected	N/A	410	952	0.430672	1.37	0.4	1.74	0.787356	No	29.4107	No	No	No	No	No	No
185	4	Case	1	No	30-39	aug2020	aug2020	29	37	8	F	African	No	Asymptomatic	1	POSITIVE	40		Yes	0	0	0	0	0	0	0	1124.4	>6000	614.3	0	No	No	Not Detected	N/A	397	1052	0.377376	1.47	0.41	1.79	0.821229	No	29.4107	No	No	No	No	No	No
185	5	Case	1	Yes	30-39	aug2020	aug2020	49	57	8	F	African	No	Asymptomatic	1	POSITIVE															No	No										No	29.4107	No	No	No	No	No	No
186	1	Case	1	No	20-29	aug2020	aug2020	5	9	4	F	African	No	Mild	3	NEGATIVE															No	No	Not Detected	N/A	1564	1117	1.40018	4.25	0.65	3.74	1.13636	No	24.0346	No	No	No	No	No	No
186	2	Case	1	No	20-29	aug2020	aug2020	12	16	4	F	African	No	Asymptomatic	1	NEGATIVE															No	No	Not Detected	N/A	1169	900	1.29889	5.69	0.45	2.8	2.03214	No	24.0346	No	No	No	No	No	No
186	3	Case	1	No	20-29	aug2020	aug2020	19	23	4	F	African	No	Asymptomatic	1	NEGATIVE															No	No	Not Detected	N/A	784	651	1.2043	2.58	0.41	1.86	1.3871	No	24.0346	No	No	No	No	No	No
186	4	Case	1	No	20-29	aug2020	aug2020	26	30	4	F	African	No	Asymptomatic	1	NEGATIVE															No	No	Not Detected	N/A	775	861	0.900116	1.95	0.37	1.88	1.03723	No	24.0346	No	No	No	No	No	No
186	5	Case	1	No	20-29	aug2020	aug2020	33	37	4	F	African	No	Asymptomatic	1	NEGATIVE															No	No	Not Detected	N/A	845	775	1.09032	1.25	0.4	2.02	0.618812	No	24.0346	No	No	No	No	No	No
186	6	Case	1	No	20-29	aug2020	aug2020	94	98	4	F	African	No	Mild	2	NEGATIVE															No	No	Not Detected	N/A	712	627	1.13557	3.25	0.44	1.61	2.01863	No	24.0346	No	No	No	No	No	No
186	7	Case	1	No	20-29	aug2020	aug2020	187	191	4	F	African	No	Asymptomatic	1	NEGATIVE															No	No	Not Detected	N/A	583	455	1.28132	3.34	0.43	1.28	2.60938	No	24.0346	No	No	No	No	No	No
187	1	Case	1	No	40-49	aug2020	aug2020	8	42	34	M	African		Mild	3	POSITIVE	40	jun2017	Yes	<90	38.3	0	0	5020	4150	0	0	0	0	0	No	No	Not Detected	N/A	464	396	1.17172	4.55	0.44	1.11	4.0991	Yes	25.1808	No	No	No	No	No	No
188	1	Case	1	No	50-59	aug2020	aug2020	8	9	1	F	African	No	Mild	3	NEGATIVE															No	No	Not Detected	N/A	2047	651	3.14439	5.41	0.68	4.98	1.08635	No	31.6032	No	Yes	No	No	No	No
188	2	Case	1	No	50-59	aug2020	aug2020	15	16	1	F	African	No	Mild	2	NEGATIVE															No	No	2Targets	>36.070874405	722	280	2.57857	4.27	0.78	1.73	2.46821	No	31.6032	No	Yes	No	No	No	No
188	3	Case	1	No	50-59	aug2020	aug2020	22	23	1	F	African	No	Mild	2	NEGATIVE															No	No	Not Detected	N/A	974	391	2.49105	2.51	0.42	2.22	1.13063	No	31.6032	No	Yes	No	No	No	No
188	5	Case	1	No	50-59	aug2020	aug2020	36	37	1	F	African	No	Mild	2	NEGATIVE															No	No	Not Detected	N/A	1085	504	2.15278	2.42	0.45	2.57	0.941634	No	31.6032	No	Yes	No	No	No	No
188	6	Case	1	No	50-59	aug2020	aug2020	95	96	1	F	African	No	Mild	2	NEGATIVE															No	No	Not Detected	N/A	1184	526	2.25095	2.52	0.36	2.62	0.961832	No	31.6032	No	Yes	No	No	No	No
188	7	Case	1	No	50-59	aug2020	aug2020	190	191	1	F	African	No	Mild	2	NEGATIVE															No	No	Not Detected	N/A	1172	454	2.5815	2.87	0.4	2.8	1.025	No	31.6032	No	Yes	No	No	No	No
189	1	Case	1	No	50-59	aug2020	aug2020	5	8	3	F	African	No	Supplemental Oxygen or Death	4	POSITIVE	40	jul2010	Yes	<90	399.8	2080	0	0	0	0	0	0	0	0	No	No	Detected	30.72409182	260	213	1.22066	7.31	0.36	0.95	7.69474	No	32.6608	No	Yes	No	No	No	No
189	5	Case	1	No	50-59	aug2020	aug2020	36	39	3	F	African	No	Mild	2	POSITIVE	40	jul2010	Yes	<90	324	165.2	0	0	0	0	0	0	0	0	No	No	Not Detected	N/A	817	754	1.08355	3.79	0.49	2.44	1.55328	No	32.6608	No	Yes	No	No	No	No
189	6	Case	1	No	50-59	aug2020	aug2020	90	93	3	F	African	No	Mild	2	POSITIVE	40	jul2010	Yes	<90	205.19	1500	0	0	0	0	0	0	0	0	No	No	Not Detected	N/A	939	800	1.17375	3.07	0.43	2.51	1.22311	No	32.6608	No	Yes	No	No	No	No
189	7	Case	1	No	50-59	aug2020	aug2020	188	191	3	F	African	No	Mild	3	POSITIVE	40	jul2010													No	No	Not Detected	N/A	1010	860	1.17442	2.7	0.33	2.8	0.964286	No	32.6608	No	Yes	No	No	No	No
190	1	Case	1	No	30-39	aug2020	sep2020	6	8	2	M	African		Mild	3	POSITIVE	40	jun2014	Yes	<90	119.8	1390	0	0	0	0	0	0	0	0	No	Yes	Not Detected	N/A	321	417	0.769784	3.32	0.64	1.06	3.13208	No	24.4561	No	No	No	No	No	No
190	3	Case	1	No	30-39	aug2020	sep2020	20	22	2	M	African		Asymptomatic	1	POSITIVE	40	jun2014	Yes	<90	237	292.2	0	0	0	0	0	0	0	0	No	Yes	Not Detected	N/A	226	397	0.56927	2.85	0.44	0.98	2.90816	No	24.4561	No	No	No	No	No	No
190	5	Case	1	No	30-39	aug2020	sep2020	36	38	2	M	African		Asymptomatic	1	POSITIVE	40	jun2014	Yes	<90	347	268.2	0	0	0	0	0	0	0	0	No	Yes	Not Detected	N/A	240	444	0.540541	2.06	0.29	0.95	2.16842	No	24.4561	No	No	No	No	No	No
190	6	Case	1	No	30-39	aug2020	sep2020	90	92	2	M	African		Asymptomatic	1	POSITIVE	40	jun2014	Yes	<90	761.19	2620	0	0	0	0	0	0	0	0	No	Yes	Not Detected	N/A	227	453	0.501104	3.3	0.35	1.01	3.26733	No	24.4561	No	No	No	No	No	No
191	1	Case	1	No	20-29	aug2020	sep2020	19	19	0	F	African	No	Supplemental Oxygen or Death	4	POSITIVE	19311	mar2015	Yes	<90	113.8	1690	0	0	0	0	0	0	0	0	Yes	Yes	Not Detected	N/A	297	1476	0.20122	1.97	0.28	2.15	0.916279	No	18.75	No	No	No	No	No	Yes
192	1	Case	1	No	50-59	sep2020	sep2020	5	11	6	F	African	No	Mild	2	NEGATIVE															No	No	Detected	35.4409568	974	727	1.33975	4.43	0.79	2.27	1.95154	No	37.1802	No	No	No	No	No	No
192	2	Case	1	No	50-59	sep2020	sep2020	11	17	6	F	African	No	Asymptomatic	1	NEGATIVE															No	No	Not Detected	N/A	1454	1250	1.1632	6.03	0.8	3.15	1.91429	No	37.1802	No	No	No	No	No	No
192	3	Case	1	Yes	50-59	sep2020	sep2020	20	26	6	F	African	No	Asymptomatic	1	NEGATIVE															No	No										No	37.1802	No	No	No	No	No	No
193	1	Case	1	No	70-79	sep2020	sep2020	8	8	0	F	African	No	Mild	3	NEGATIVE															No	No	Not Detected	N/A	534	601	0.888519	10.17	0.62	1.55	6.56129	No	35.2617	No	Yes	No	No	No	No
193	2	Case	1	No	70-79	sep2020	sep2020	15	15	0	F	African	No	Asymptomatic	1	NEGATIVE															No	No	Not Detected	N/A	906	753	1.20319	15.51	0.61	2.19	7.08219	No	35.2617	No	Yes	No	No	No	No
193	3	Case	1	No	70-79	sep2020	sep2020	23	23	0	F	African	No	Mild	2	NEGATIVE															No	No	Not Detected	N/A	958	797	1.20201	5.26	0.75	2.09	2.51675	No	35.2617	No	Yes	No	No	No	No
193	4	Case	1	No	70-79	sep2020	sep2020	29	29	0	F	African	No	Asymptomatic	1	NEGATIVE															No	No	Not Detected	N/A	925	724	1.27762	4.06	0.65	1.98	2.05051	No	35.2617	No	Yes	No	No	No	No
193	5	Case	1	No	70-79	sep2020	sep2020	36	36	0	F	African	No	Asymptomatic	1	NEGATIVE															No	No	Inconclusive	N/A	1067	971	1.09887	4.07	0.86	2.47	1.64777	No	35.2617	No	Yes	No	No	No	No
193	6	Case	1	No	70-79	sep2020	sep2020	84	84	0	F	African	No	Mild	2	NEGATIVE															No	No	Not Detected	N/A	1146	906	1.2649	7.33	1.04	2.35	3.11915	No	35.2617	No	Yes	No	No	No	No
193	7	Case	1	No	70-79	sep2020	sep2020	190	190	0	F	African	No	Asymptomatic	1	NEGATIVE															No	No	Not Detected	N/A	1177	861	1.36702	4.76	0.7	2.16	2.2037	No	35.2617	No	Yes	No	No	No	No
194	1	Case	1	No	40-49	aug2020	sep2020	12	18	6	M	African		Supplemental Oxygen or Death	4	POSITIVE	40	jul2005	Yes	<90	>800	<150	0	0	0	0	0	0	0	0	No	No	Not Detected	N/A	82	152	0.539474	4.35	0.47	0.39	11.1538	No	24.2215	No	No	No	No	No	No
194	2	Case	1	No	40-49	aug2020	sep2020	19	25	6	M	African		Supplemental Oxygen or Death	4	POSITIVE	40	jul2005													No	No	Not Detected	N/A	36	113	0.318584	7.32	0.36	0.26	28.1538	No	24.2215	No	No	No	No	No	No
194	3	Case	1	No	40-49	aug2020	sep2020	26	32	6	M	African		Supplemental Oxygen or Death	4	POSITIVE	40	jul2005	Yes	<90	>800	162.2	0	0	0	0	0	0	0	0	No	No	Not Detected	N/A	134	236	0.567797	10.99	0.78	0.63	17.4444	No	24.2215	No	No	No	No	No	No
194	4	Case	1	No	40-49	aug2020	sep2020	33	39	6	M	African		Mild	3	POSITIVE	40	jul2005	Yes	112.7	>800	2630	0	0	0	0	0	0	0	0	No	No	Not Detected	N/A	93	132	0.704545	7.32	0.55	0.3	24.4	No	24.2215	No	No	No	No	No	No
194	5	Case	1	Yes	40-49	aug2020	sep2020	39	45	6	M	African		Mild	3	POSITIVE		jul2005													No	No										No	24.2215	No	No	No	No	No	No
194	6	Case	1	Yes	40-49	aug2020	sep2020	86	92	6	M	African		Mild	3	POSITIVE		jul2005													No	No										No	24.2215	No	No	No	No	No	No
194	7	Case	1	Yes	40-49	aug2020	sep2020	191	197	6	M	African		Mild	2	POSITIVE		jul2005													No	No										No	24.2215	No	No	No	No	No	No
195	1	Case	1	No	60-69	sep2020	sep2020	7	7	0	M	African		Mild	3	POSITIVE	40	jun2018	Yes	0	0	<150	0	0	0	<180	606.4	0	0	0	No	No	Inconclusive	N/A	172	1253	0.137271	10.39	0.87	2.05	5.06829	No	28.7317	No	No	No	No	No	No
195	3	Case	1	Yes	60-69	sep2020	sep2020	17	17	0	M	African		Asymptomatic	1	POSITIVE		jun2018													No	No										No	28.7317	No	No	No	No	No	No
195	4	Case	1	Yes	60-69	sep2020	sep2020	28	28	0	M	African		Asymptomatic	1	POSITIVE		jun2018													No	No										No	28.7317	No	No	No	No	No	No
195	5	Case	1	Yes	60-69	sep2020	sep2020	34	34	0	M	African		Asymptomatic	1	POSITIVE		jun2018													No	No										No	28.7317	No	No	No	No	No	No
195	6	Case	1	Yes	60-69	sep2020	sep2020	95	95	0	M	African		Asymptomatic	1	POSITIVE		jun2018													No	No										No	28.7317	No	No	No	No	No	No
196	1	Case	1	No	50-59	aug2020	sep2020	24	30	6	F	African	No	Mild	3	NEGATIVE															No	No	Not Detected	N/A	1101	1429	0.770469	4.42	0.52	3.79	1.16623	No	22.3081	No	No	No	No	No	No
196	2	Case	1	No	50-59	aug2020	sep2020	32	38	6	F	African	No	Asymptomatic	1	NEGATIVE															No	No	Not Detected	N/A	240	388	0.618557	13.29	0.43	1.01	13.1584	No	22.3081	No	No	No	No	No	No
196	3	Case	1	No	50-59	aug2020	sep2020	38	44	6	F	African	No	Asymptomatic	1	NEGATIVE															No	No	Not Detected	N/A	210	402	0.522388	13.31	0.52	1.05	12.6762	No	22.3081	No	No	No	No	No	No
196	4	Case	1	No	50-59	aug2020	sep2020	45	51	6	F	African	No	Asymptomatic	1	NEGATIVE															No	No	Not Detected	N/A	765	810	0.944444	8.56	1.04	2.52	3.39683	No	22.3081	No	No	No	No	No	No
196	5	Case	1	No	50-59	aug2020	sep2020	52	58	6	F	African	No	Mild	2	NEGATIVE															No	No	Not Detected	N/A	143	185	0.772973	11.4	0.76	0.58	19.6552	No	22.3081	No	No	No	No	No	No
196	6	Case	1	No	50-59	aug2020	sep2020	98	104	6	F	African	No	Mild	2	NEGATIVE															No	No	Not Detected	N/A	445	396	1.12374	4.28	0.71	1.02	4.19608	No	22.3081	No	No	No	No	No	No
196	7	Case	1	No	50-59	aug2020	sep2020	206	212	6	F	African	No	Asymptomatic	1	NEGATIVE															No	No	Not Detected	N/A	472	589	0.801358	6.26	0.88	1.82	3.43956	No	22.3081	No	No	No	No	No	No
197	1	Case	1	No	30-39	aug2020	sep2020	30	44	14	M	African		Supplemental Oxygen or Death	4	POSITIVE	224688	jun2017	No	0	0	0	0	0	0	0	0	0	0	0	Yes	Yes	Not Detected	N/A	279	855	0.326316	3.93	0.59	1.8	2.18333	No	21.048	No	No	No	No	No	No
197	2	Case	1	No	30-39	aug2020	sep2020	37	51	14	M	African		Supplemental Oxygen or Death	4	POSITIVE	293338	jun2017	No	0	0	0	0	0	0	0	0	0	0	0	Yes	Yes	Not Detected	N/A	262	1255	0.208765	3.92	0.6	1.98	1.9798	No	21.048	No	No	No	No	No	No
197	3	Case	1	No	30-39	aug2020	sep2020	44	58	14	M	African		Mild	2	POSITIVE	1743	jun2017	Yes	<90	394	468.2	0	0	0	0	0	0	0	0	Yes	Yes	Not Detected	N/A	210	910	0.230769	6.75	0.97	2.05	3.29268	No	21.048	No	No	No	No	No	No
197	4	Case	1	No	30-39	aug2020	sep2020	51	65	14	M	African		Mild	2	POSITIVE	758	jun2017	Yes	<90	356.46	>5000	0	0	0	0	0	0	0	0	Yes	Yes	Not Detected	N/A	362	1521	0.238001	4.43	0.73	2.35	1.88511	No	21.048	No	No	No	No	No	No
197	5	Case	1	No	30-39	aug2020	sep2020	58	72	14	M	African		Mild	2	POSITIVE	558	jun2017	Yes	<90	179.46	>5000	0	0	0	0	0	0	0	0	Yes	Yes	Not Detected	N/A	361	1877	0.192328	2.6	0.67	2.88	0.902778	No	21.048	No	No	No	No	No	No
197	6	Case	1	No	30-39	aug2020	sep2020	107	121	14	M	African		Asymptomatic	1	POSITIVE	240	jun2017	Yes	<90	222.19	>5000	0	0	0	0	0	0	0	0	Yes	Yes	Not Detected	N/A	307	1297	0.2367	1.68	0.51	1.96	0.857143	No	21.048	No	No	No	No	No	No
197	7	Case	1	No	30-39	aug2020	sep2020	212	226	14	M	African		Asymptomatic	1	POSITIVE	40	jun2017													Yes	Yes	Not Detected	N/A	232	631	0.36767	1.65	0.44	1.24	1.33065	No	21.048	No	No	No	No	No	No
198	1	Case	1	No	50-59	sep2020	sep2020	2	2	0	M	African		Mild	3	POSITIVE	40	jun2005	Yes	0	0	0	0	2967.89	3000	<180	451.4	0	0	0	No	No	Not Detected	N/A	169	218	0.775229	8	0.33	0.51	15.6863	No	26.4463	Yes	Yes	No	No	No	No
198	2	Case	1	No	50-59	sep2020	sep2020	9	9	0	M	African		Supplemental Oxygen or Death	4	POSITIVE	40	jun2005	Yes	0	0	0	0	5217.89	4950	<180	349.4	0	0	0	No	No	Not Detected	N/A	160	380	0.421053	11.36	0.32	0.71	16	No	26.4463	Yes	Yes	No	No	No	No
198	3	Case	1	Yes	50-59	sep2020	sep2020	15	15	0	M	African		Mild	2	POSITIVE		jun2005													No	No										No	26.4463	Yes	Yes	No	No	No	No
198	5	Case	1	Yes	50-59	sep2020	sep2020	29	29	0	M	African		Mild	3	POSITIVE		jun2005													No	No										No	26.4463	Yes	Yes	No	No	No	No
198	6	Case	1	Yes	50-59	sep2020	sep2020	47	47	0	M	African		Supplemental Oxygen or Death	8	POSITIVE		jun2005													No	No										No	26.4463	Yes	Yes	No	No	No	No
199	1	Case	1	No	60-69	sep2020	sep2020	12	14	2	M	African		Mild	3	POSITIVE	40	feb2000	Yes	<90	159	0	0	5347.89	5350	0	0	0	0	0	No	No	Not Detected	N/A	484	821	0.589525	6.74	0.75	2.18	3.09174	Yes	29.3848	No	No	No	No	No	No
199	2	Case	1	No	60-69	sep2020	sep2020	20	22	2	M	African		Mild	2	POSITIVE	40	feb2000	Yes	<90	302	0	0	3277.89	3290	0	0	0	0	0	No	No	Inconclusive	N/A	487	889	0.547807	5.76	0.53	2.23	2.58296	Yes	29.3848	No	No	No	No	No	No
199	3	Case	1	No	60-69	sep2020	sep2020	26	28	2	M	African		Asymptomatic	1	POSITIVE	40	feb2000	Yes	<90	653	0	0	3837.89	3960	0	0	0	0	0	No	No	Inconclusive	N/A	555	1209	0.459057	4.46	0.56	2.67	1.67041	Yes	29.3848	No	No	No	No	No	No
199	4	Case	1	Yes	60-69	sep2020	sep2020	32	34	2	M	African		Asymptomatic	1	POSITIVE		feb2000													No	No										Yes	29.3848	No	No	No	No	No	No
199	6	Case	1	No	60-69	sep2020	sep2020	89	91	2	M	African		Mild	3	POSITIVE	40	feb2000	Yes	<90	396.19	0	0	0	3480	0	0	0	0	0	No	No	Not Detected	N/A	539	943	0.57158	2.85	0.61	2.31	1.23377	Yes	29.3848	No	No	No	No	No	No
199	7	Case	1	Yes	60-69	sep2020	sep2020	164	166	2	M	African		Supplemental Oxygen or Death	8	POSITIVE		feb2000													No	No										Yes	29.3848	No	No	No	No	No	No
200	1	Case	1	No	60-69	aug2020	sep2020	18	19	1	F	African	No	Supplemental Oxygen or Death	4	NEGATIVE															No	No	Inconclusive	N/A	968	468	2.06838	7.68	0.74	1.75	4.38857	No	28.7317	Yes	Yes	No	No	No	No
200	3	Case	1	Yes	60-69	aug2020	sep2020	32	33	1	F	African	No	Mild	2	NEGATIVE															No	No										No	28.7317	Yes	Yes	No	No	No	No
200	4	Case	1	No	60-69	aug2020	sep2020	39	40	1	F	African	No	Mild	2	NEGATIVE															No	No	Not Detected	N/A	1395	629	2.21781	4.94	0.72	2.48	1.99194	No	28.7317	Yes	Yes	No	No	No	No
200	5	Case	1	No	60-69	aug2020	sep2020	46	47	1	F	African	No	Mild	2	NEGATIVE															No	No	Not Detected	N/A	1411	564	2.50177	4.07	0.69	2.34	1.73932	No	28.7317	Yes	Yes	No	No	No	No
200	6	Case	1	No	60-69	aug2020	sep2020	94	95	1	F	African	No	Asymptomatic	1	NEGATIVE															No	No	Not Detected	N/A	1541	687	2.24309	4.8	0.57	2.67	1.79775	No	28.7317	Yes	Yes	No	No	No	No
200	7	Case	1	No	60-69	aug2020	sep2020	200	201	1	F	African	No	Asymptomatic	1	NEGATIVE															No	No	Not Detected	N/A	1309	541	2.41959	3.7	0.6	2.24	1.65179	No	28.7317	Yes	Yes	No	No	No	No
201	1	Case	1	No	60-69	sep2020	sep2020	9	9	0	M	African		Mild	3	NEGATIVE															No	Yes	Not Detected	N/A	1366	978	1.39673	3.31	0.93	3.31	1	No	22.4996	No	No	No	No	No	Yes
201	3	Case	1	No	60-69	sep2020	sep2020	23	23	0	M	African		Mild	2	NEGATIVE															No	Yes	Not Detected	N/A	888	745	1.19195	1.06	0.42	2.17	0.488479	No	22.4996	No	No	No	No	No	Yes
201	5	Case	1	Yes	60-69	sep2020	sep2020	36	36	0	M	African		Mild	2	NEGATIVE															No	Yes										No	22.4996	No	No	No	No	No	Yes
201	7	Case	1	No	60-69	sep2020	sep2020	192	192	0	M	African		Asymptomatic	1	NEGATIVE															No	Yes	Not Detected	N/A	511	485	1.05361	1.54	0.72	1.45	1.06207	No	22.4996	No	No	No	No	No	Yes
202	1	Case	1	No	30-39	sep2020	sep2020	8	13	5	F	African	No	Mild	3	NEGATIVE															No	No	Not Detected	N/A	946	607	1.55848	4.05	0.36	2.26	1.79204	No	38.0623	No	No	No	No	No	No
202	2	Case	1	Yes	30-39	sep2020	sep2020	14	19	5	F	African	No	Asymptomatic	1	NEGATIVE															No	No										No	38.0623	No	No	No	No	No	No
202	3	Case	1	No	30-39	sep2020	sep2020	22	27	5	F	African	No	Asymptomatic	1	NEGATIVE															No	No	Not Detected	N/A	872	604	1.44371	3.38	0.23	1.94	1.74227	No	38.0623	No	No	No	No	No	No
202	4	Case	1	Yes	30-39	sep2020	sep2020	29	34	5	F	African	No	Asymptomatic	1	NEGATIVE															No	No										No	38.0623	No	No	No	No	No	No
202	5	Case	1	No	30-39	sep2020	sep2020	36	41	5	F	African	No	Asymptomatic	1	NEGATIVE															No	No	Not Detected	N/A	831	577	1.44021	3.42	0.29	1.96	1.7449	No	38.0623	No	No	No	No	No	No
202	6	Case	1	No	30-39	sep2020	sep2020	83	88	5	F	African	No	Asymptomatic	1	NEGATIVE															No	No	Not Detected	N/A	748	736	1.0163	8.81	0.4	2.02	4.36139	No	38.0623	No	No	No	No	No	No
203	1	Case	1	No	20-29	sep2020	sep2020	9			F	African	No	Asymptomatic	1	POSITIVE	40	jun2016	Yes	<90	56.3	365.2	0	0	0	0	0	0	0	0	No	No	Not Detected	N/A	547	616	0.887987	4.07	0.11	1.8	2.26111	No	21.5645	No	No	No	No	No	Yes
203	5	Case	1	No	20-29	sep2020	sep2020	37			F	African	No	Asymptomatic	1	POSITIVE	40	jun2016	Yes	<90	56.56	3670	0	0	0	0	0	0	0	0	No	No	Not Detected	N/A	1284	1086	1.18232	2.19	0.22	2.92	0.75	No	21.5645	No	No	No	No	No	Yes
203	6	Case	1	No	20-29	sep2020	sep2020	85			F	African	No	Asymptomatic	1	POSITIVE	40	jun2016	Yes	<90	169.19	2480	0	0	0	0	0	0	0	0	No	No	Not Detected	N/A	1236	1002	1.23353	1.56	0.43	2.7	0.577778	No	21.5645	No	No	No	No	No	Yes
203	7	Case	1	No	20-29	sep2020	sep2020	196			F	African	No	Asymptomatic	1	POSITIVE	40	jun2016													No	No	Not Detected	N/A	1153	950	1.21368	2.63	0.26	2.42	1.08678	No	21.5645	No	No	No	No	No	Yes
204	1	Case	1	No	30-39	sep2020	sep2020	15	20	5	F	African	No	Mild	2	NEGATIVE															No	No	Detected	35.66341087	1009	933	1.08146	4.55	0.78	2.76	1.64855	No	31.6404	No	No	No	No	No	No
204	2	Case	1	No	30-39	sep2020	sep2020	22	27	5	F	African	No	Mild	2	NEGATIVE															No	No	Inconclusive	N/A	1024	1045	0.979904	3.11	0.84	2.62	1.18702	No	31.6404	No	No	No	No	No	No
204	3	Case	1	No	30-39	sep2020	sep2020	29	34	5	F	African	No	Mild	2	NEGATIVE															No	No	Not Detected	N/A	809	746	1.08445	2.49	0.48	2.36	1.05508	No	31.6404	No	No	No	No	No	No
204	4	Case	1	No	30-39	sep2020	sep2020	36	41	5	F	African	No	Asymptomatic	1	NEGATIVE															No	No	Not Detected	N/A	841	902	0.932373	4.02	0.62	2.38	1.68908	No	31.6404	No	No	No	No	No	No
204	5	Case	1	No	30-39	sep2020	sep2020	53	58	5	F	African	No	Mild	2	NEGATIVE															No	No	Not Detected	N/A	847	1007	0.841112	3.23	0.74	2.34	1.38034	No	31.6404	No	No	No	No	No	No
204	6	Case	1	No	30-39	sep2020	sep2020	103	108	5	F	African	No	Mild	2	NEGATIVE															No	No	Not Detected	N/A	918	1006	0.912525	3.63	0.7	2.49	1.45783	No	31.6404	No	No	No	No	No	No
204	7	Case	1	No	30-39	sep2020	sep2020	196	201	5	F	African	No	Mild	2	NEGATIVE															No	No	Not Detected	N/A	874	1020	0.856863	2.63	0.61	2.89	0.910035	No	31.6404	No	No	No	No	No	No
205	1	Case	1	No	20-29	sep2020	sep2020	10			M	African		Asymptomatic	1	NEGATIVE															No	No	Not Detected	N/A	1046	626	1.67093	20.17	1.62	2.27	8.88546	No	20.7612	No	No	No	No	No	No
205	2	Case	1	No	20-29	sep2020	sep2020	17			M	African		Asymptomatic	1	NEGATIVE															No	No	Not Detected	N/A	1359	804	1.6903	10.37	1.41	2.97	3.49158	No	20.7612	No	No	No	No	No	No
205	3	Case	1	No	20-29	sep2020	sep2020	24			M	African		Asymptomatic	1	NEGATIVE															No	No	Detected	29.10351594	914	403	2.26799	5.33	0.43	1.68	3.17262	No	20.7612	No	No	No	No	No	No
205	4	Case	1	Yes	20-29	sep2020	sep2020	28			M	African		Asymptomatic	1	NEGATIVE															No	No										No	20.7612	No	No	No	No	No	No
205	5	Case	1	No	20-29	sep2020	sep2020	39			M	African		Asymptomatic	1	NEGATIVE															No	No	Not Detected	N/A	1084	859	1.26193	2.7	0.46	2.55	1.05882	No	20.7612	No	No	No	No	No	No
206	1	Case	1	No	50-59	sep2020	sep2020	21	22	1	F	African	No	Mild	3	NEGATIVE															No	No	Inconclusive	N/A	1767	806	2.19231	5.02	0.35	3.36	1.49405	No	34.0785	Yes	No	No	No	No	No
206	2	Case	1	No	50-59	sep2020	sep2020	28	29	1	F	African	No	Mild	2	NEGATIVE															No	No	Not Detected	N/A	1932	885	2.18305	3.19	0.38	3.45	0.924638	No	34.0785	Yes	No	No	No	No	No
206	3	Case	1	Yes	50-59	sep2020	sep2020	34	35	1	F	African	No	Mild	2	NEGATIVE															No	No										No	34.0785	Yes	No	No	No	No	No
206	5	Case	1	Yes	50-59	sep2020	sep2020	48	49	1	F	African	No	Mild	2	NEGATIVE															No	No										No	34.0785	Yes	No	No	No	No	No
207	1	Case	1	No	70-79	sep2020	sep2020	8	12	4	M	African		Supplemental Oxygen or Death	4	NEGATIVE															No	No	2Targets	>36.41389906	286	221	1.29412	11.42	0.23	0.87	13.1264	No	25.0135	Yes	Yes	No	No	No	No
207	2	Case	1	No	70-79	sep2020	sep2020	15	19	4	M	African		Mild	2	NEGATIVE															No	No	Inconclusive	N/A	900	590	1.52542	5.52	0.42	2.04	2.70588	No	25.0135	Yes	Yes	No	No	No	No
207	3	Case	1	No	70-79	sep2020	sep2020	22	26	4	M	African		Mild	2	NEGATIVE															No	No	Detected	34.47	1039	702	1.48006	3.54	0.45	2.39	1.48117	No	25.0135	Yes	Yes	No	No	No	No
207	4	Case	1	No	70-79	sep2020	sep2020	29	33	4	M	African		Mild	2	NEGATIVE															No	No	Not Detected	N/A	1213	963	1.25961	2.85	0.5	2.66	1.07143	No	25.0135	Yes	Yes	No	No	No	No
207	5	Case	1	No	70-79	sep2020	sep2020	34	38	4	M	African		Mild	2	NEGATIVE															No	No	Not Detected	N/A	1125	1001	1.12388	2.6	0.42	2.57	1.01167	No	25.0135	Yes	Yes	No	No	No	No
207	6	Case	1	No	70-79	sep2020	sep2020	88	92	4	M	African		Mild	2	NEGATIVE															No	No	Not Detected	N/A	1079	952	1.1334	2.47	0.53	2.57	0.961089	No	25.0135	Yes	Yes	No	No	No	No
207	7	Case	1	No	70-79	sep2020	sep2020	195	199	4	M	African		Asymptomatic	1	NEGATIVE															No	No	Not Detected	N/A	1181	932	1.26717	2.66	0.4	2.65	1.00377	No	25.0135	Yes	Yes	No	No	No	No
208	1	Case	1	No	60-69	sep2020	sep2020	9	10	1	F	African	No	Mild	3	NEGATIVE															No	No	Not Detected	N/A	1845	1137	1.62269	9.04	1.76	4.21	2.14727	No	30.4438	Yes	Yes	No	No	No	No
208	2	Case	1	No	60-69	sep2020	sep2020	16	17	1	F	African	No	Mild	2	NEGATIVE															No	No	Not Detected	N/A	1217	992	1.22681	8.21	1.38	2.93	2.80205	No	30.4438	Yes	Yes	No	No	No	No
208	3	Case	1	No	60-69	sep2020	sep2020	23	24	1	F	African	No	Mild	2	NEGATIVE															No	No	Not Detected	N/A	1393	917	1.51908	6.75	1.74	2.97	2.27273	No	30.4438	Yes	Yes	No	No	No	No
208	4	Case	1	No	60-69	sep2020	sep2020	30	31	1	F	African	No	Mild	2	NEGATIVE															No	No	Not Detected	N/A	1154	1444	0.799169	16	2.49	3.6	4.44444	No	30.4438	Yes	Yes	No	No	No	No
208	5	Case	1	No	60-69	sep2020	sep2020	37	38	1	F	African	No	Mild	2	NEGATIVE															No	No	Not Detected	N/A	1522	1291	1.17893	7.01	1.45	3.55	1.97465	No	30.4438	Yes	Yes	No	No	No	No
208	6	Case	1	No	60-69	sep2020	sep2020	86	87	1	F	African	No	Mild	2	NEGATIVE															No	No	Not Detected	N/A	1254	953	1.31584	7	0.93	2.71	2.58303	No	30.4438	Yes	Yes	No	No	No	No
209	1	Case	1	No	30-39	sep2020	oct2020	6	8	2	M	African		Supplemental Oxygen or Death	4	NEGATIVE			No	0	0	0	0	0	0	0	0	0	0	0	Yes	No	Not Detected	N/A	545	300	1.81667	25.79	1.04	1.19	21.6723	Yes	15.9675	No	No	No	No	No	No
209	2	Case	1	Yes	30-39	sep2020	oct2020	31	33	2	M	African		Supplemental Oxygen or Death	8	NEGATIVE															Yes	No										Yes	15.9675	No	No	No	No	No	No
210	1	Case	1	No	60-69	oct2020	oct2020	0	9	9	M	African		Supplemental Oxygen or Death	4	NEGATIVE															No	No	Detected	21.52364711666667	507	540	0.938889	12.17	0.58	1.54	7.9026	No	27.968	Yes	No	No	No	No	No
210	2	Case	1	No	60-69	oct2020	oct2020	8	17	9	M	African		Supplemental Oxygen or Death	4	NEGATIVE															No	No	Detected	30.82755467333333	901	866	1.04042	12.27	1.2	2.77	4.4296	No	27.968	Yes	No	No	No	No	No
210	3	Case	1	Yes	60-69	oct2020	oct2020	11	20	9	M	African		Mild	3	NEGATIVE															No	No										No	27.968	Yes	No	No	No	No	No
210	4	Case	1	Yes	60-69	oct2020	oct2020	18	27	9	M	African		Mild	2	NEGATIVE															No	No										No	27.968	Yes	No	No	No	No	No
210	5	Case	1	No	60-69	oct2020	oct2020	28	37	9	M	African		Mild	2	NEGATIVE															No	No	Not Detected	N/A	1023	871	1.17451	5.29	0.74	2.42	2.18595	No	27.968	Yes	No	No	No	No	No
210	6	Case	1	No	60-69	oct2020	oct2020	100	109	9	M	African		Mild	2	NEGATIVE															No	No	Not Detected	N/A	1804	1537	1.17371	5.54	1.17	4.21	1.31591	No	27.968	Yes	No	No	No	No	No
210	7	Case	1	No	60-69	oct2020	oct2020	185	194	9	M	African		Asymptomatic	1	NEGATIVE															No	No	Not Detected	N/A	1020	1125	0.906667	2.88	0.68	2.5	1.152	No	27.968	Yes	No	No	No	No	No
211	1	Case	1	No	30-39	sep2020	oct2020	7	8	1	M	African		Mild	3	NEGATIVE															No	No	2Targets	>36.7688533	274	129	2.12403	6	0.22	0.73	8.21918	No	24.8356	No	No	No	No	No	No
211	3	Case	1	No	30-39	sep2020	oct2020	23	24	1	M	African		Asymptomatic	1	NEGATIVE															No	No	Not Detected	N/A	1078	479	2.25052	1.68	0.45	1.95	0.861538	No	24.8356	No	No	No	No	No	No
211	7	Case	1	Yes	30-39	sep2020	oct2020	191	192	1	M	African		Asymptomatic	1	NEGATIVE															No	No										No	24.8356	No	No	No	No	No	No
212	1	Case	1	No	30-39	oct2020	oct2020	5	8	3	M	African		Mild	3	POSITIVE	96479		No	0	0	0	0	0	0	0	0	0	0	0	No	No	Not Detected	N/A	561	801	0.700375	13.93	0.9	2.74	5.08394	Yes	19.3337	No	No	No	No	No	No
212	2	Case	1	No	30-39	oct2020	oct2020	12	15	3	M	African		Mild	2	POSITIVE	163167		No	0	0	0	0	0	0	0	0	0	0	0	No	No	Not Detected	N/A	470	763	0.61599	2.57	0.34	2.03	1.26601	Yes	19.3337	No	No	No	No	No	No
212	3	Case	1	No	30-39	oct2020	oct2020	19	22	3	M	African		Mild	2	POSITIVE			No	0	0	0	0	0	0	0	0	0	0	0	No	No	Not Detected	N/A	456	701	0.650499	2.59	0.28	1.79	1.44693	Yes	19.3337	No	No	No	No	No	No
212	4	Case	1	No	30-39	oct2020	oct2020	27	30	3	M	African		Mild	2	POSITIVE	48326		No	0	0	0	0	0	0	0	0	0	0	0	No	No	Not Detected	N/A	567	1010	0.561386	1.24	0.31	2.01	0.616915	Yes	19.3337	No	No	No	No	No	No
212	5	Case	1	No	30-39	oct2020	oct2020	33	36	3	M	African		Mild	2	POSITIVE	41463		No	0	0	0	0	0	0	0	0	0	0	0	No	No	Not Detected	N/A	560	1043	0.536913	1.1	0.35	2.03	0.541872	Yes	19.3337	No	No	No	No	No	No
212	6	Case	1	No	30-39	oct2020	oct2020	108	111	3	M	African		Asymptomatic	1	POSITIVE	111118		No	0	0	0	0	0	0	0	0	0	0	0	No	No	Not Detected	N/A	441	715	0.616783	1.81	0.3	1.57	1.15287	Yes	19.3337	No	No	No	No	No	No
212	7	Case	1	No	30-39	oct2020	oct2020	187	190	3	M	African		Asymptomatic	1	POSITIVE	114999														No	No	Not Detected	N/A	513	901	0.569367	2.18	0.47	1.96	1.11224	Yes	19.3337	No	No	No	No	No	No
213	1	Case	1	No	50-59	oct2020	oct2020	6	9	3	M	African		Mild	3	NEGATIVE															No	No	Not Detected	N/A	463	326	1.42025	11.47	0.39	1.12	10.2411	No	30.1103	No	No	No	No	No	No
213	2	Case	1	No	50-59	oct2020	oct2020	14	17	3	M	African		Mild	2	NEGATIVE															No	No	Not Detected	N/A	735	412	1.78398	4.22	0.6	1.44	2.93056	No	30.1103	No	No	No	No	No	No
213	3	Case	1	No	50-59	oct2020	oct2020	21	24	3	M	African		Asymptomatic	1	NEGATIVE															No	No	Not Detected	N/A	723	433	1.66975	3.82	0.42	1.36	2.80882	No	30.1103	No	No	No	No	No	No
213	4	Case	1	No	50-59	oct2020	oct2020	28	31	3	M	African		Asymptomatic	1	NEGATIVE															No	No		.	947	589	1.60781	3.44	0.5	1.68	2.04762	No	30.1103	No	No	No	No	No	No
213	5	Case	1	No	50-59	oct2020	oct2020	35	38	3	M	African		Asymptomatic	1	NEGATIVE															No	No	Not Detected	N/A	1088	697	1.56098	4.48	0.48	2.02	2.21782	No	30.1103	No	No	No	No	No	No
213	7	Case	1	No	50-59	oct2020	oct2020	189	192	3	M	African		Asymptomatic	1	NEGATIVE															No	No			1186	870	1.36322	2.95	0.43	2.44	1.20902	No	30.1103	No	No	No	No	No	No
214	1	Case	1	No	30-39	oct2020	oct2020	5	16	11	M	African		Mild	3	POSITIVE	40	jun2011	Yes	0	0	468	0	0	0	0	0	0	0	0	No	Yes	2Targets	>36.44200156	420	667	0.629685	4.08	0.57	1.74	2.34483	No	28.578	No	No	No	No	No	No
214	3	Case	1	No	30-39	oct2020	oct2020	19	30	11	M	African		Mild	2	POSITIVE	40	jun2011													No	Yes	Not Detected	N/A	355	549	0.64663	3.15	0.68	1.25	2.52	No	28.578	No	No	No	No	No	No
214	4	Case	1	No	30-39	oct2020	oct2020	26	37	11	M	African		Asymptomatic	1	POSITIVE	40	jun2011	Yes	<90	51.06	1150	350.4	0	0	0	558.9	0	0	0	No	Yes	Not Detected	N/A	337	528	0.638258	2.31	0.49	1.31	1.76336	No	28.578	No	No	No	No	No	No
214	5	Case	1	No	30-39	oct2020	oct2020	33	44	11	M	African		Asymptomatic	1	POSITIVE	40	jun2011	Yes	124.7	<20	806	478.4	0	0	0	438.9	0	0	0	No	Yes	Not Detected	N/A	350	563	0.62167	4.02	0.56	1.15	3.49565	No	28.578	No	No	No	No	No	No
214	6	Case	1	No	30-39	oct2020	oct2020	107	118	11	M	African		Asymptomatic	1	POSITIVE	40	jun2011	Yes	<90	0	175	1190.8	0	0	0	297.3	0	0	0	No	Yes	Not Detected	N/A	392	623	0.629214	4.47	0.55	1.49	3	No	28.578	No	No	No	No	No	No
214	7	Case	1	No	30-39	oct2020	oct2020	187	198	11	M	African		Asymptomatic	1	POSITIVE	40	jun2011													No	Yes	Not Detected	N/A	403	700	0.575714	4.49	0.55	1.79	2.50838	No	28.578	No	No	No	No	No	No
215	1	Case	1	No	50-59	oct2020	oct2020	7	12	5	M	African		Mild	3	POSITIVE	374	jun2019	Yes	<90	0	0	631.4	0	0	0	<180	0	0	0	No	No	Not Detected	N/A	222	483	0.459627	1.43	0.29	0.87	1.64368	Yes	25.42	No	No	No	No	No	No
215	2	Case	1	No	50-59	oct2020	oct2020	17	22	5	M	African		Asymptomatic	1	POSITIVE	40	jun2019	Yes	101.7	0	0	2271.4	0	0	0	<180	0	0	0	No	No	Not Detected	N/A	225	537	0.418994	0.79	0.27	1	0.79	Yes	25.42	No	No	No	No	No	No
215	3	Case	1	Yes	50-59	oct2020	oct2020	20	25	5	M	African		Mild	2	POSITIVE		jun2019													No	No										Yes	25.42	No	No	No	No	No	No
215	4	Case	1	No	50-59	oct2020	oct2020	31	36	5	M	African		Asymptomatic	1	POSITIVE	40	jun2019	Yes	<90	0	0	2791.4	0	0	0	<180	0	0	0	No	No	Not Detected	N/A	190	449	0.423163	1.26	0.2	0.79	1.59494	Yes	25.42	No	No	No	No	No	No
215	5	Case	1	No	50-59	oct2020	oct2020	38	43	5	M	African		Asymptomatic	1	POSITIVE	40	jun2019	Yes	0	0	0	524.8	0	0	0	<180	0	0	0	No	No	Not Detected	N/A	250	484	0.516529	1.53	0.22	0.83	1.84337	Yes	25.42	No	No	No	No	No	No
215	6	Case	1	No	50-59	oct2020	oct2020	104	109	5	M	African		Asymptomatic	1	POSITIVE	1686	jun2019	No	0	0	0	0	0	0	0	0	0	0	0	No	No	Not Detected	N/A	184	524	0.351145	1.02	0.21	0.89	1.14607	Yes	25.42	No	No	No	No	No	No
215	7	Case	1	No	50-59	oct2020	oct2020	189	194	5	M	African		Asymptomatic	1	POSITIVE	40	jun2019													No	No	Not Detected	N/A	229	513	0.446394	1.09	0.3	1.01	1.07921	Yes	25.42	No	No	No	No	No	No
216	1	Case	2	No	30-39	jan2021	jan2021	6	7	1	F	African	No	Mild	3	POSITIVE	206137	sep2008	No	0	0	0	0	0	0	0	0	0	0	0	No	Yes	Detected	29.73333333	9	155	0.0580645	8.88	0.14	0.43	20.6512	No	22.7732	No	No	No	No	No	No
216	2	Case	2	No	30-39	jan2021	jan2021	13	14	1	F	African	No	Mild	3	POSITIVE	14559	sep2008	No	0	0	0	0	0	0	0	0	0	0	0	No	Yes	2Targets	>36.77								No	22.7732	No	No	No	No	No	No
216	3	Case	2	No	30-39	jan2021	jan2021	20	21	1	F	African	No	Mild	2	POSITIVE	4920	sep2008	Yes	0	0	0	263	0	0	0	<180	0	0	0	No	Yes	Not Detected	N/A	7	403	0.0173697	0.94	0.3	0.74	1.27027	No	22.7732	No	No	No	No	No	No
216	4	Case	2	No	30-39	jan2021	jan2021	27	28	1	F	African	No	Mild	2	POSITIVE	60721	sep2008	No	0	0	0	0	0	0	0	0	0	0	0	No	Yes	Not Detected	N/A	10	275	0.0363636	1	0.2	0.39	2.5641	No	22.7732	No	No	No	No	No	No
216	5	Case	2	No	30-39	jan2021	jan2021	34	35	1	F	African	No	Mild	2	POSITIVE	49883	sep2008	No	0	0	0	0	0	0	0	0	0	0	0	No	Yes	Not Detected	N/A	6	532	0.0112782	0.89	0.16	0.71	1.25352	No	22.7732	No	No	No	No	No	No
216	6	Case	2	No	30-39	jan2021	jan2021	97	98	1	F	African	No	Asymptomatic	1	POSITIVE	86189	sep2008													No	Yes	Not Detected	N/A	3	414	0.00724638	1.59	0.25	0.53	3	No	22.7732	No	No	No	No	No	No
217	1	Case	2	No	60-69	jan2021	jan2021	9	16	7	F	African	No	Supplemental Oxygen or Death	4	POSITIVE	40	jun2019	Yes	<90	142.19	927	0	0	0	0	0	0	0	0	No	No	Inconclusive	N/A	464	230	2.01739	5.04	0.3	1.46	3.45205	No	29.2969	No	No	No	No	No	No
217	2	Case	2	No	60-69	jan2021	jan2021	16	23	7	F	African	No	Supplemental Oxygen or Death	4	POSITIVE	40	jun2019	Yes	<90	76.79	953	0	0	0	0	0	0	0	0	No	No	Not Detected	N/A	323	225	1.43556	6.92	0.29	1.41	4.9078	No	29.2969	No	No	No	No	No	No
217	3	Case	2	Yes	60-69	jan2021	jan2021	22	29	7	F	African	No	Supplemental Oxygen or Death	4	POSITIVE		jun2019													No	No										No	29.2969	No	No	No	No	No	No
217	4	Case	2	Yes	60-69	jan2021	jan2021	29	36	7	F	African	No	Asymptomatic	1	POSITIVE		jun2019													No	No										No	29.2969	No	No	No	No	No	No
218	1	Case	2	No	30-39	jan2021	jan2021	6	9	3	M	African		Mild	3	NEGATIVE			No	0	0	0	0	0	0	0	0	0	0	0	No	No	Detected	29.2	485	418	1.16029	1.04	0.2	1.12	0.928571	No	33.2031	No	No	No	No	No	No
218	2	Case	2	No	30-39	jan2021	jan2021	13	16	3	M	African		Mild	2	NEGATIVE			No	0	0	0	0	0	0	0	0	0	0	0	No	No	2Targets	>36.81	401	325	1.23385	1.6	0.17	0.9	1.77778	No	33.2031	No	No	No	No	No	No
218	3	Case	2	No	30-39	jan2021	jan2021	20	23	3	M	African		Mild	2	NEGATIVE															No	No	Not Detected	N/A	425	305	1.39344	1.58	0.17	0.84	1.88095	No	33.2031	No	No	No	No	No	No
218	4	Case	2	No	30-39	jan2021	jan2021	27	30	3	M	African		Mild	2	NEGATIVE															No	No	2Targets	>37.99	534	430	1.24186	0.98	0.16	1.1	0.890909	No	33.2031	No	No	No	No	No	No
218	5	Case	2	No	30-39	jan2021	jan2021	34	37	3	M	African		Mild	2	NEGATIVE															No	No	Not Detected	N/A	529	452	1.17035	1	0.19	1.12	0.892857	No	33.2031	No	No	No	No	No	No
219	1	Case	2	No	30-39	jan2021	jan2021	8			M	African		Asymptomatic	1	POSITIVE	40	apr2013	Yes	<90	124.19	>5000	0	0	0	0	0	0	0	0	No	No	Not Detected	N/A	746	663	1.12519	1.43	0.24	1.79	0.798883	No	25.3069	No	No	No	No	No	No
219	2	Case	2	No	30-39	jan2021	jan2021	15			M	African		Asymptomatic	1	POSITIVE	40	apr2013	Yes	0	0	2956.62	0	0	0	0	0	0	0	0	No	No	Not Detected	N/A	661	547	1.20841	1.28	0.14	1.6	0.8	No	25.3069	No	No	No	No	No	No
219	3	Case	2	Yes	30-39	jan2021	jan2021	23			M	African		Asymptomatic	1	POSITIVE		apr2013													No	No										No	25.3069	No	No	No	No	No	No
219	4	Case	2	Yes	30-39	jan2021	jan2021	28			M	African		Asymptomatic	1	POSITIVE		apr2013													No	No										No	25.3069	No	No	No	No	No	No
219	5	Case	2	No	30-39	jan2021	jan2021	36			M	African		Mild	2	POSITIVE	40	apr2013	Yes	0	0	1903.7	0	0	0	0	0	0	0	0	No	No	Not Detected	N/A	421	455	0.925275	1.84	0.45	1.15	1.6	No	25.3069	No	No	No	No	No	No
220	1	Case	2	No	20-29	jan2021	jan2021	8	26	18	F	African	No	Mild	3	POSITIVE	211877		No	0	0	0	0	0	0	0	0	0	0	0	No	Yes	Detected	33.59666667	606	1381	0.438812	2.88	0.45	2.47	1.16599	No	32.0461	No	No	No	No	No	No
220	2	Case	2	Yes	20-29	jan2021	jan2021	15	33	18	F	African	No	Asymptomatic	1	POSITIVE															No	Yes										No	32.0461	No	No	No	No	No	No
220	4	Case	2	Yes	20-29	jan2021	jan2021	28	46	18	F	African	No	Asymptomatic	1	POSITIVE															No	Yes										No	32.0461	No	No	No	No	No	No
220	5	Case	2	No	20-29	jan2021	jan2021	36	54	18	F	African	No	Mild	2	POSITIVE	94502		No	0	0	0	0	0	0	0	0	0	0	0	No	Yes	Not Detected	N/A	386	1210	0.319008	6.4	0.66	1.85	3.45946	No	32.0461	No	No	No	No	No	No
221	1	Case	2	No	60-69	jan2021	jan2021	4	10	6	M	African		Mild	2	NEGATIVE			No	0	0	0	0	0	0	0	0	0	0	0	No	No	Not Detected	N/A	782	669	1.16891	3.08	0.59	1.94	1.58763	No	37.5776	No	Yes	No	No	No	No
221	2	Case	2	No	60-69	jan2021	jan2021	11	17	6	M	African		Asymptomatic	1	NEGATIVE															No	No	Not Detected	N/A	559	353	1.58357	2.41	0.32	1.32	1.82576	No	37.5776	No	Yes	No	No	No	No
221	3	Case	2	No	60-69	jan2021	jan2021	18	24	6	M	African		Asymptomatic	1	NEGATIVE															No	No	Not Detected	N/A	665	525	1.26667	2.28	0.27	1.61	1.41615	No	37.5776	No	Yes	No	No	No	No
221	4	Case	2	No	60-69	jan2021	jan2021	25	31	6	M	African		Asymptomatic	1	NEGATIVE															No	No	Not Detected	N/A	665	531	1.25235	2.48	0.32	1.7	1.45882	No	37.5776	No	Yes	No	No	No	No
221	5	Case	2	No	60-69	jan2021	jan2021	32	38	6	M	African		Asymptomatic	1	NEGATIVE															No	No	Not Detected	N/A	883	594	1.48653	2.58	0.39	1.79	1.44134	No	37.5776	No	Yes	No	No	No	No
222	1	Case	2	No	20-29	jan2021	jan2021	1	6	5	M	African		Mild	3	NEGATIVE			No	0	0	0	0	0	0	0	0	0	0	0	No	No	Detected	33.33333333	1114	656	1.69817	1.48	0.42	2.05	0.721951	No	22.2826	No	No	No	No	No	No
222	2	Case	2	No	20-29	jan2021	jan2021	8	13	5	M	African		Mild	2	NEGATIVE															No	No	Not Detected	N/A	1063	646	1.64551	1.77	0.52	2.27	0.779736	No	22.2826	No	No	No	No	No	No
222	3	Case	2	No	20-29	jan2021	jan2021	15	20	5	M	African		Asymptomatic	1	NEGATIVE															No	No	Not Detected	N/A	1038	581	1.78657	2.21	0.5	2.12	1.04245	No	22.2826	No	No	No	No	No	No
222	4	Case	2	No	20-29	jan2021	jan2021	22	27	5	M	African		Asymptomatic	1	NEGATIVE															No	No	Detected	34.73333333	1183	688	1.71948	1.76	0.46	2.29	0.768559	No	22.2826	No	No	No	No	No	No
222	5	Case	2	No	20-29	jan2021	jan2021	31	36	5	M	African		Mild	2	NEGATIVE															No	No	Not Detected	N/A	1174	578	2.03114	1.98	0.36	1.73	1.14451	No	22.2826	No	No	No	No	No	No
223	1	Case	2	No	30-39	jan2021	jan2021	8	13	5	M	African		Mild	2	NEGATIVE			No	0	0	0	0	0	0	0	0	0	0	0	No	No	Not Detected	N/A	1081	680	1.58971	2.03	0.39	2.27	0.894273	No	19.5312	No	No	No	No	No	No
223	2	Case	2	No	30-39	jan2021	jan2021	15	20	5	M	African		Mild	2	NEGATIVE															No	No	Not Detected	N/A	905	597	1.51591	1.81	0.32	1.82	0.994505	No	19.5312	No	No	No	No	No	No
223	3	Case	2	No	30-39	jan2021	jan2021	22	27	5	M	African		Mild	2	NEGATIVE															No	No	Not Detected	N/A	928	561	1.65419	1.42	0.28	1.84	0.771739	No	19.5312	No	No	No	No	No	No
223	4	Case	2	No	30-39	jan2021	jan2021	29	34	5	M	African		Mild	2	NEGATIVE															No	No	Not Detected	N/A	830	571	1.45359	1.95	0.31	1.81	1.07735	No	19.5312	No	No	No	No	No	No
223	5	Case	2	No	30-39	jan2021	jan2021	36	41	5	M	African		Mild	2	NEGATIVE															No	No	Not Detected	N/A	842	572	1.47203	1.58	0.27	1.61	0.981366	No	19.5312	No	No	No	No	No	No
224	1	Case	2	No	40-49	jan2021	jan2021	7	15	8	M	African		Supplemental Oxygen or Death	4	POSITIVE	125735														No	No	Not Detected	N/A	8	405	0.0197531	10.54	0.43	0.75	14.0533	No	35.9085	No	No	No	No	No	No
224	2	Case	2	No	40-49	jan2021	jan2021	14	22	8	M	African		Asymptomatic	1	POSITIVE	103744		No	0	0	0	0	0	0	0	0	0	0	0	No	No	Not Detected	N/A	17	796	0.0213568	3.38	0.43	1.08	3.12963	No	35.9085	No	No	No	No	No	No
224	3	Case	2	No	40-49	jan2021	jan2021	21	29	8	M	African		Mild	2	POSITIVE	221006		No	0	0	0	0	0	0	0	0	0	0	0	No	No	Not Detected	N/A	33	1446	0.0228216	2.64	0.42	1.77	1.49153	No	35.9085	No	No	No	No	No	No
224	4	Case	2	No	40-49	jan2021	jan2021	28	36	8	M	African		Mild	2	POSITIVE	274747		No	0	0	0	0	0	0	0	0	0	0	0	No	No	Not Detected	N/A	30	1333	0.0225056	1.38	0.34	1.82	0.758242	No	35.9085	No	No	No	No	No	No
224	5	Case	2	No	40-49	jan2021	jan2021	35	43	8	M	African		Mild	2	POSITIVE	144012														No	No	Not Detected	N/A	29	1644	0.0176399	1.31	0.33	1.86	0.704301	No	35.9085	No	No	No	No	No	No
225	1	Case	2	No	50-59	jan2021	jan2021	5	7	2	F	African	No	Mild	3	POSITIVE	372		No	0	0	0	0	0	0	0	0	0	0	0	No	No	Detected	30.38333333	503	1115	0.451121	3.6	0.57	2.85	1.26316	No	35.1562	No	No	No	No	No	No
225	2	Case	2	Yes	50-59	jan2021	jan2021	11	13	2	F	African	No	Mild	2	POSITIVE															No	No										No	35.1562	No	No	No	No	No	No
225	4	Case	2	No	50-59	jan2021	jan2021	26	28	2	F	African	No	Mild	2	POSITIVE	3318		No	0	0	0	0	0	0	0	0	0	0	0	No	No	Not Detected	N/A	592	1893	0.312731	3.17	0.58	3.69	0.859079	No	35.1562	No	No	No	No	No	No
225	5	Case	2	No	50-59	jan2021	jan2021	33	35	2	F	African	No	Mild	2	POSITIVE	1094		No	0	0	0	0	0	0	0	0	0	0	0	No	No	Not Detected	N/A	661	2095	0.315513	3.03	0.61	4.13	0.733656	No	35.1562	No	No	No	No	No	No
226	1	Case	2	No	70-79	jan2021	jan2021	6	8	2	F	African	No	Mild	3	NEGATIVE			No	0	0	0	0	0	0	0	0	0	0	0	No	No	Detected	37.75								No		No	Yes	No	No	No	No
226	3	Case	2	No	70-79	jan2021	jan2021	20	22	2	F	African	No	Mild	2	NEGATIVE															No	No	Not Detected	N/A	1125	222	5.06757	3.93	0.68	2.41	1.63071	No		No	Yes	No	No	No	No
226	4	Case	2	No	70-79	jan2021	jan2021	27	29	2	F	African	No	Mild	2	NEGATIVE															No	No	Not Detected	N/A	1018	208	4.89423	3.76	0.47	2.23	1.6861	No		No	Yes	No	No	No	No
226	5	Case	2	No	70-79	jan2021	jan2021	34	36	2	F	African	No	Mild	2	NEGATIVE															No	No	Not Detected	N/A								No		No	Yes	No	No	No	No
227	1	Case	2	No	30-39	feb2021	feb2021	3	4	1	M	African		Mild	3	POSITIVE	12347		No	0	0	0	0	0	0	0	0	0	0	0	No	No	Not Detected	N/A	85	790	0.107595	4.44	0.17	1.06	4.18868	Yes	17.301	No	No	No	No	No	No
227	3	Case	2	No	30-39	feb2021	feb2021	17	18	1	M	African		Mild	2	POSITIVE	4814		Yes	<90	63.7	1683.7	0	0	0	0	0	0	0	0	No	No	Not Detected	N/A	237	4287	0.0552834	2.79	0.45	4.74	0.588608	Yes	17.301	No	No	No	No	No	No
227	4	Case	2	No	30-39	feb2021	feb2021	24	25	1	M	African		Mild	2	POSITIVE	404														No	No			241	2884	0.0835645	1.63	0.37	3.08	0.529221	Yes	17.301	No	No	No	No	No	No
227	5	Case	2	No	30-39	feb2021	feb2021	31	32	1	M	African		Mild	2	POSITIVE															No	No	Not Detected	N/A	257	3265	0.0787136	1.53	0.41	3.66	0.418033	Yes	17.301	No	No	No	No	No	No
228	1	Case	2	No	70-79	feb2021	feb2021	5	23	18	M	Indian		Supplemental Oxygen or Death	4	NEGATIVE			No	0	0	0	0	0	0	0	0	0	0	0	No	No	Detected	31.19666667	123	123	1	6.25	0.46	0.63	9.92064	No	29.6875	No	No	No	No	No	No
228	3	Case	2	No	70-79	feb2021	feb2021	19	37	18	M	Indian		Mild	3	NEGATIVE															No	No	Not Detected	N/A	1273	729	1.74623	4.6	0.7	2.75	1.67273	No	29.6875	No	No	No	No	No	No
228	5	Case	2	No	70-79	feb2021	feb2021	33	51	18	M	Indian		Mild	2	NEGATIVE															No	No	Not Detected	N/A	1253	826	1.51695	3.08	0.57	2.64	1.16667	No	29.6875	No	No	No	No	No	No
229	1	Case	2	No	30-39	feb2021	feb2021	6	18	12	M	Indian		Mild	3	NEGATIVE			No	0	0	0	0	0	0	0	0	0	0	0	No	No	2Targets	>37.21	911	711	1.28129	3.56	0.41	1.94	1.83505	Yes	22.2222	No	No	No	No	No	No
229	2	Case	2	Yes	30-39	feb2021	feb2021	13	25	12	M	Indian		Asymptomatic	1	NEGATIVE															No	No										Yes	22.2222	No	No	No	No	No	No
229	3	Case	2	No	30-39	feb2021	feb2021	23	35	12	M	Indian		Asymptomatic	1	NEGATIVE															No	No	Inconclusive	N/A	794	709	1.11989	3.61	0.39	1.83	1.97268	Yes	22.2222	No	No	No	No	No	No
229	4	Case	2	No	30-39	feb2021	feb2021	30	42	12	M	Indian		Asymptomatic	1	NEGATIVE															No	No	Not Detected	N/A	681	511	1.33268	3.57	0.41	1.49	2.39597	Yes	22.2222	No	No	No	No	No	No
229	5	Case	2	No	30-39	feb2021	feb2021	39	51	12	M	Indian		Mild	2	NEGATIVE															No	No	Not Detected	N/A	738	490	1.50612	3.88	0.5	1.39	2.79137	Yes	22.2222	No	No	No	No	No	No
230	1	Case	2	No	20-29	feb2021	feb2021	5	8	3	F	African	No	Mild	3	NEGATIVE			No	0	0	0	0	0	0	0	0	0	0	0	No	No	Detected	35.63666666666666	1551	892	1.73879	2.83	0.28	3.35	0.844776	No	28.764	No	No	No	No	No	No
230	2	Case	2	No	20-29	feb2021	feb2021	12	15	3	F	African	No	Mild	2	NEGATIVE															No	No	Not Detected	N/A	821	593	1.38449	1.74	0.28	1.77	0.983051	No	28.764	No	No	No	No	No	No
230	3	Case	2	No	20-29	feb2021	feb2021	19	22	3	F	African	No	Mild	2	NEGATIVE															No	No	Not Detected	N/A	900	636	1.41509	2.29	0.17	1.88	1.21809	No	28.764	No	No	No	No	No	No
230	4	Case	2	No	20-29	feb2021	feb2021	26	29	3	F	African	No	Asymptomatic	1	NEGATIVE															No	No	Not Detected	N/A	773	595	1.29916	2.14	0.19	1.88	1.1383	No	28.764	No	No	No	No	No	No
230	5	Case	2	No	20-29	feb2021	feb2021	33	36	3	F	African	No	Asymptomatic	1	NEGATIVE															No	No	Not Detected	N/A	913	710	1.28592	2	0.24	2	1	No	28.764	No	No	No	No	No	No
231	1	Case	2	No	30-39	feb2021	mar2021	-24	15	39	M	African		Mild	3	NEGATIVE															No	No	Not Detected	N/A	453	498	0.909639	4.45	0.08	1.2	3.70833	Yes	22.8624	No	No	No	No	No	Unknown
231	2	Case	2	No	30-39	feb2021	mar2021	-17	22	39	M	African		Mild	2	NEGATIVE															No	No	2Targets	>37.62	1194	886	1.34763	2.92	0.55	2.54	1.14961	Yes	22.8624	No	No	No	No	No	Unknown
231	3	Case	2	No	30-39	feb2021	mar2021	-10	29	39	M	African		Asymptomatic	1	NEGATIVE															No	No	2Targets	>37.935	595	513	1.15984	1.24	0.38	1.28	0.96875	Yes	22.8624	No	No	No	No	No	Unknown
231	4	Case	2	No	30-39	feb2021	mar2021	-3	36	39	M	African		Asymptomatic	1	NEGATIVE															No	No	Not Detected	N/A	768	699	1.09871	0.98	0.23	1.63	0.601227	Yes	22.8624	No	No	No	No	No	Unknown
231	5	Case	2	No	30-39	feb2021	mar2021	4	43	39	M	African		Asymptomatic	1	NEGATIVE															No	No	Not Detected	N/A	694	517	1.34236	1.19	0.24	1.45	0.82069	Yes	22.8624	No	No	No	No	No	Unknown
232	1	Case	2	No	70-79	mar2021	mar2021	3	6	3	F	African	No	Mild	2	NEGATIVE															No	No	Not Detected	N/A	1375	975	1.41026	2.97	0.28	2.91	1.02062	No	22.6003	No	Yes	No	No	No	No
233	1	Case	2	No	70-79	mar2021	mar2021	7	13	6	M	African		Supplemental Oxygen or Death	4	NEGATIVE															No	No	Not Detected	N/A	339	488	0.694672	6.32	0.79	1.66	3.80723	No	23.7332	No	No	No	No	No	No
233	2	Case	2	No	70-79	mar2021	mar2021	14	20	6	M	African		Supplemental Oxygen or Death	4	NEGATIVE															No	No	Not Detected	N/A	324	450	0.72	7.91	0.45	1.31	6.03817	No	23.7332	No	No	No	No	No	No
233	3	Case	2	No	70-79	mar2021	mar2021	21	27	6	M	African		Supplemental Oxygen or Death	4	NEGATIVE															No	No	Not Detected	N/A	390	467	0.835118	5.18	0.47	1.62	3.19753	No	23.7332	No	No	No	No	No	No
233	4	Case	2	No	70-79	mar2021	mar2021	28	34	6	M	African		Asymptomatic	1	NEGATIVE															No	No	Not Detected	N/A	904	712	1.26966	3.09	0.66	2.44	1.26639	No	23.7332	No	No	No	No	No	No
233	5	Case	2	No	70-79	mar2021	mar2021	35	41	6	M	African		Mild	3	NEGATIVE															No	No	Not Detected	N/A	595	574	1.03659	3.74	0.71	1.94	1.92784	No	23.7332	No	No	No	No	No	No
234	1	Case	2	No	30-39	mar2021	mar2021	10	13	3	M	African		Mild	3	POSITIVE	8581	mar2018													Yes	No	Detected	17.89666666666666	12	802	0.0149626	3.45	0.21	0.82	4.20732	Yes	15.625	No	No	No	No	No	No
234	2	Case	2	Yes	30-39	mar2021	mar2021	19	22	3	M	African		Asymptomatic	1	POSITIVE		mar2018													Yes	No										Yes	15.625	No	No	No	No	No	No
234	3	Case	2	No	30-39	mar2021	mar2021	24	27	3	M	African		Asymptomatic	1	POSITIVE	119835	mar2018													Yes	No	Detected	20.04666666666667	17	690	0.0246377	3.64	0.52	0.84	4.33333	Yes	15.625	No	No	No	No	No	No
234	4	Case	2	No	30-39	mar2021	mar2021	31	34	3	M	African		Mild	2	POSITIVE	249833	mar2018													Yes	No	Detected	17.38333333333334	19	606	0.0313531	3.1	0.51	0.76	4.07895	Yes	15.625	No	No	No	No	No	No
234	5	Case	2	No	30-39	mar2021	mar2021	38	41	3	M	African		Asymptomatic	1	POSITIVE	482965	mar2018													Yes	No	Detected	19.92666666666667	18	923	0.0195016	3.25	0.67	1.22	2.66393	Yes	15.625	No	No	No	No	No	No
235	1	Case	2	No	60-69	mar2021	mar2021	20	27	7	M	African		Supplemental Oxygen or Death	4	NEGATIVE															No	No	2Targets	>35.555	1901	1451	1.31013	3.22	0.73	3.7	0.87027	No	42.517	No	Yes	Yes	No	No	No
235	2	Case	2	No	60-69	mar2021	mar2021	27	34	7	M	African		Mild	3	NEGATIVE															No	No	2Targets	>36.15	622	722	0.861496	5.27	0.34	1.62	3.25309	No	42.517	No	Yes	Yes	No	No	No
235	3	Case	2	No	60-69	mar2021	mar2021	35	42	7	M	African		Mild	2	NEGATIVE															No	No	Detected	36.37	1251	1105	1.13213	2.78	0.43	2.48	1.12097	No	42.517	No	Yes	Yes	No	No	No
236	1	Case	2	No	20-29	apr2021	apr2021	4	5	1	M	African		Mild	3	NEGATIVE															No	No	Not Detected	N/A	969	564	1.71809	1.93	0.36	2.22	0.869369	No	24.2188	No	No	No	No	No	No
236	2	Case	2	No	20-29	apr2021	apr2021	11	12	1	M	African		Asymptomatic	1	NEGATIVE															No	No	Not Detected	N/A	835	583	1.43225	1.65	0.27	2.04	0.808824	No	24.2188	No	No	No	No	No	No
[truncated: 7 more columns]
