# Supplementary figures and images for: HIV status alters disease severity and immune cell responses in Beta variant SARS-CoV-2 infection wave
Source: eLife journal article supplement (doi:10.7554/elife.67397), 2021-10-05

HIV negative

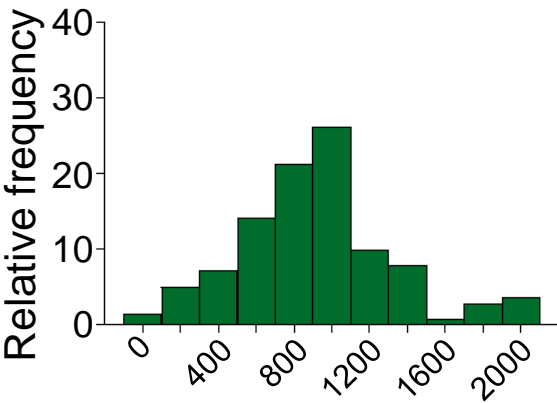

HIV ART suppressed

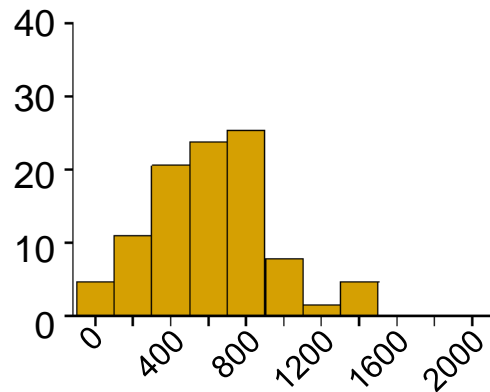

HIV viremic

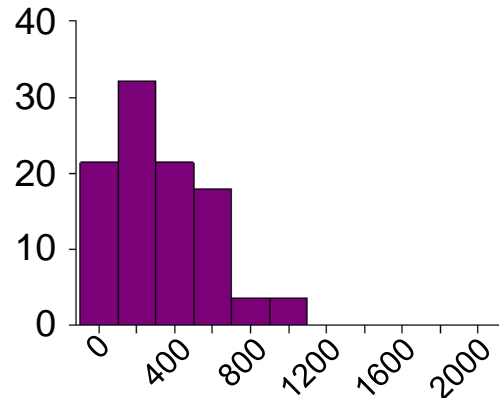Median CD4 Count (cells/ $\mu$ L)

Supplement: supp [file elife-67397-supp-v1.zip]

**A**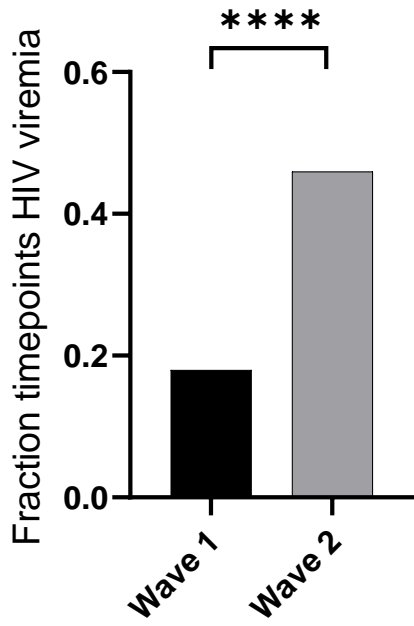**B**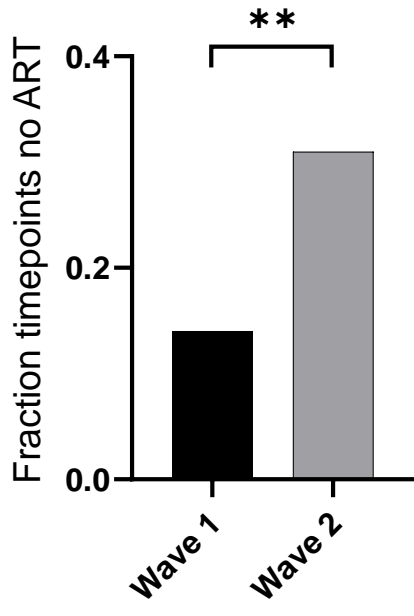

Supplement: supp [file elife-67397-supp-v1.zip]

**A**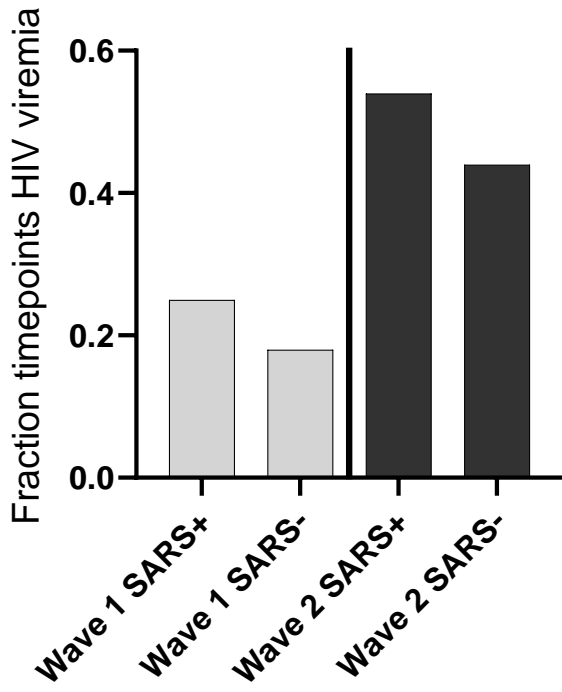**B**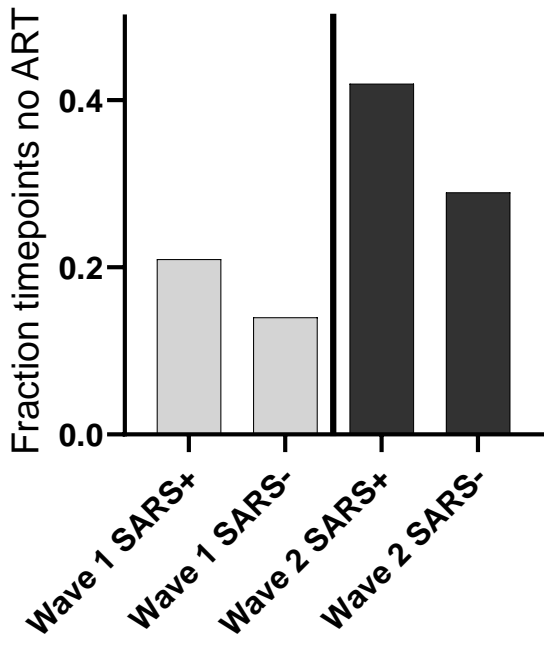

Supplement: supp [file elife-67397-supp-v1.zip]

Max Disease Severity

n= 41

n= 6

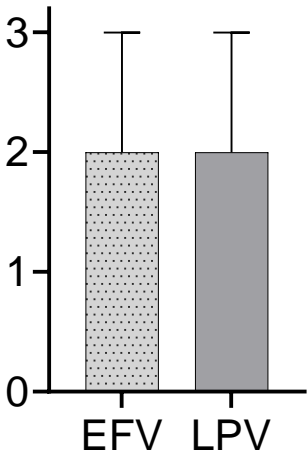

Supplement: supp [file elife-67397-supp-v1.zip]

**A**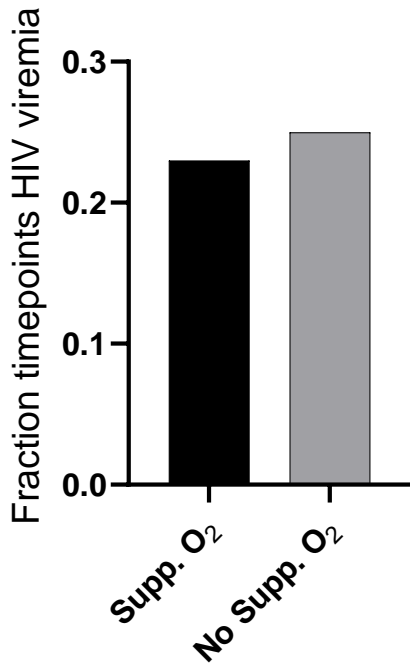**B**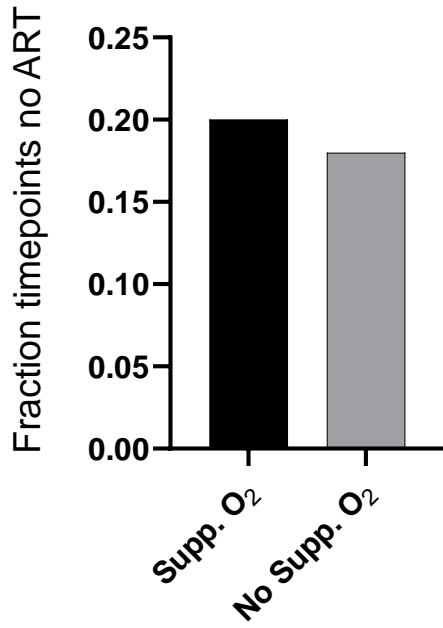

Supplement: supp [file elife-67397-supp-v1.zip]

**A**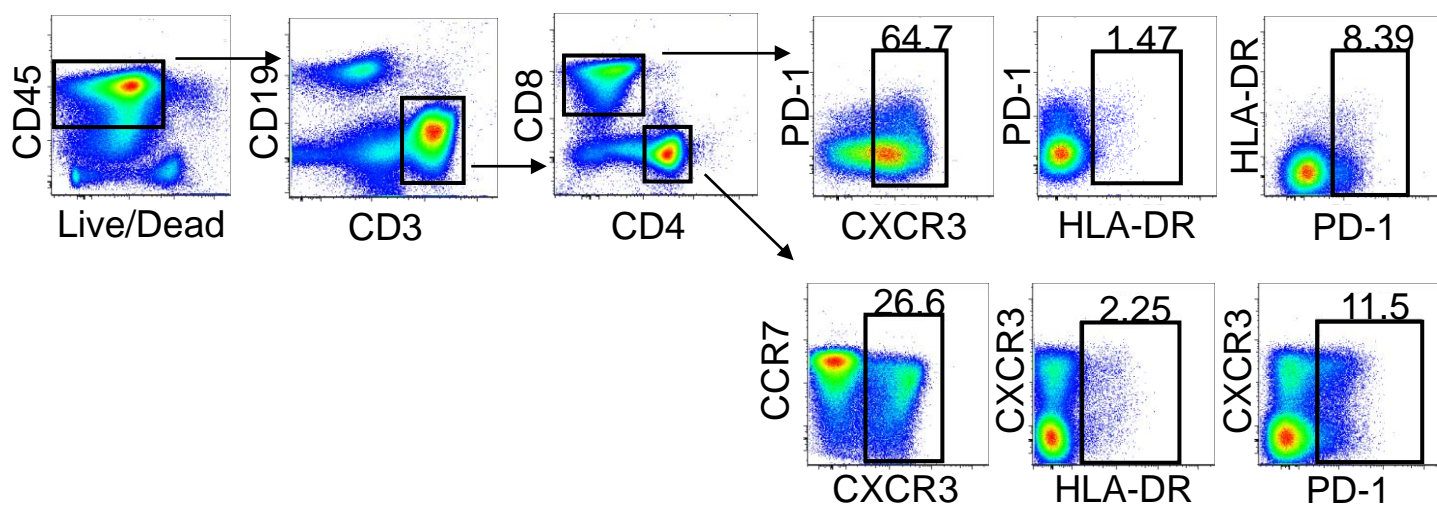**B**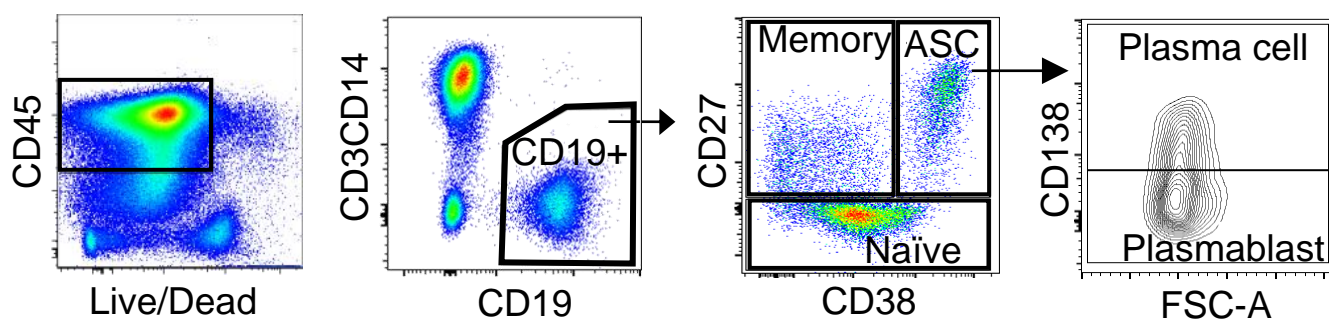**C**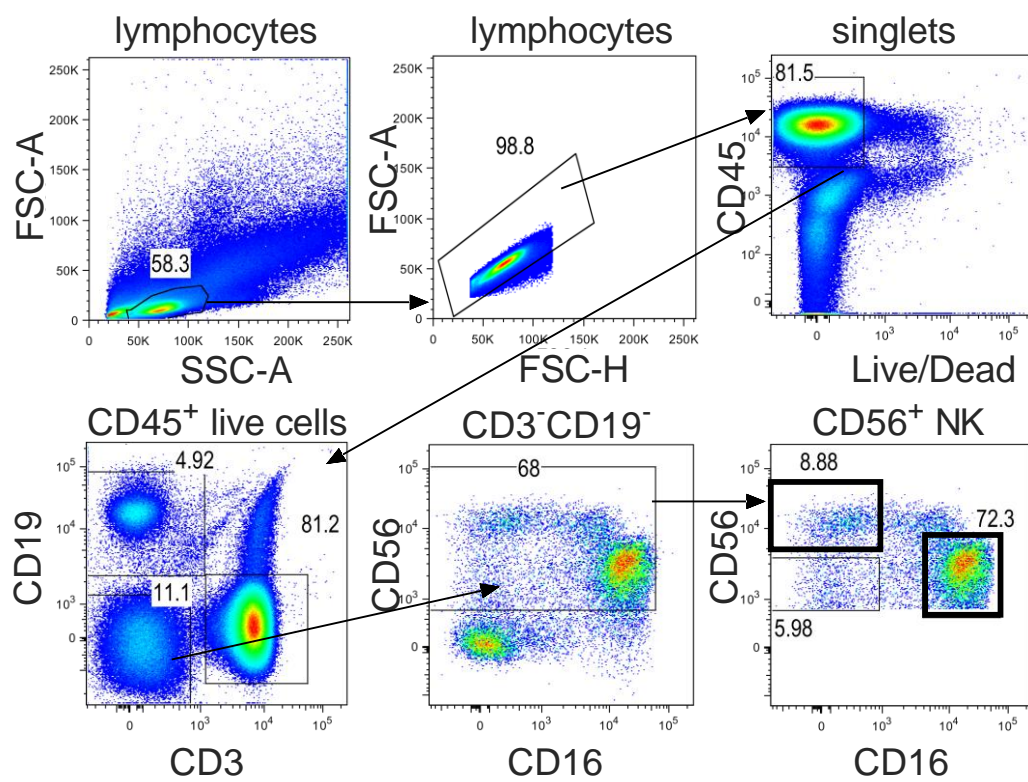

Supplement: supp [file elife-67397-supp-v1.zip]

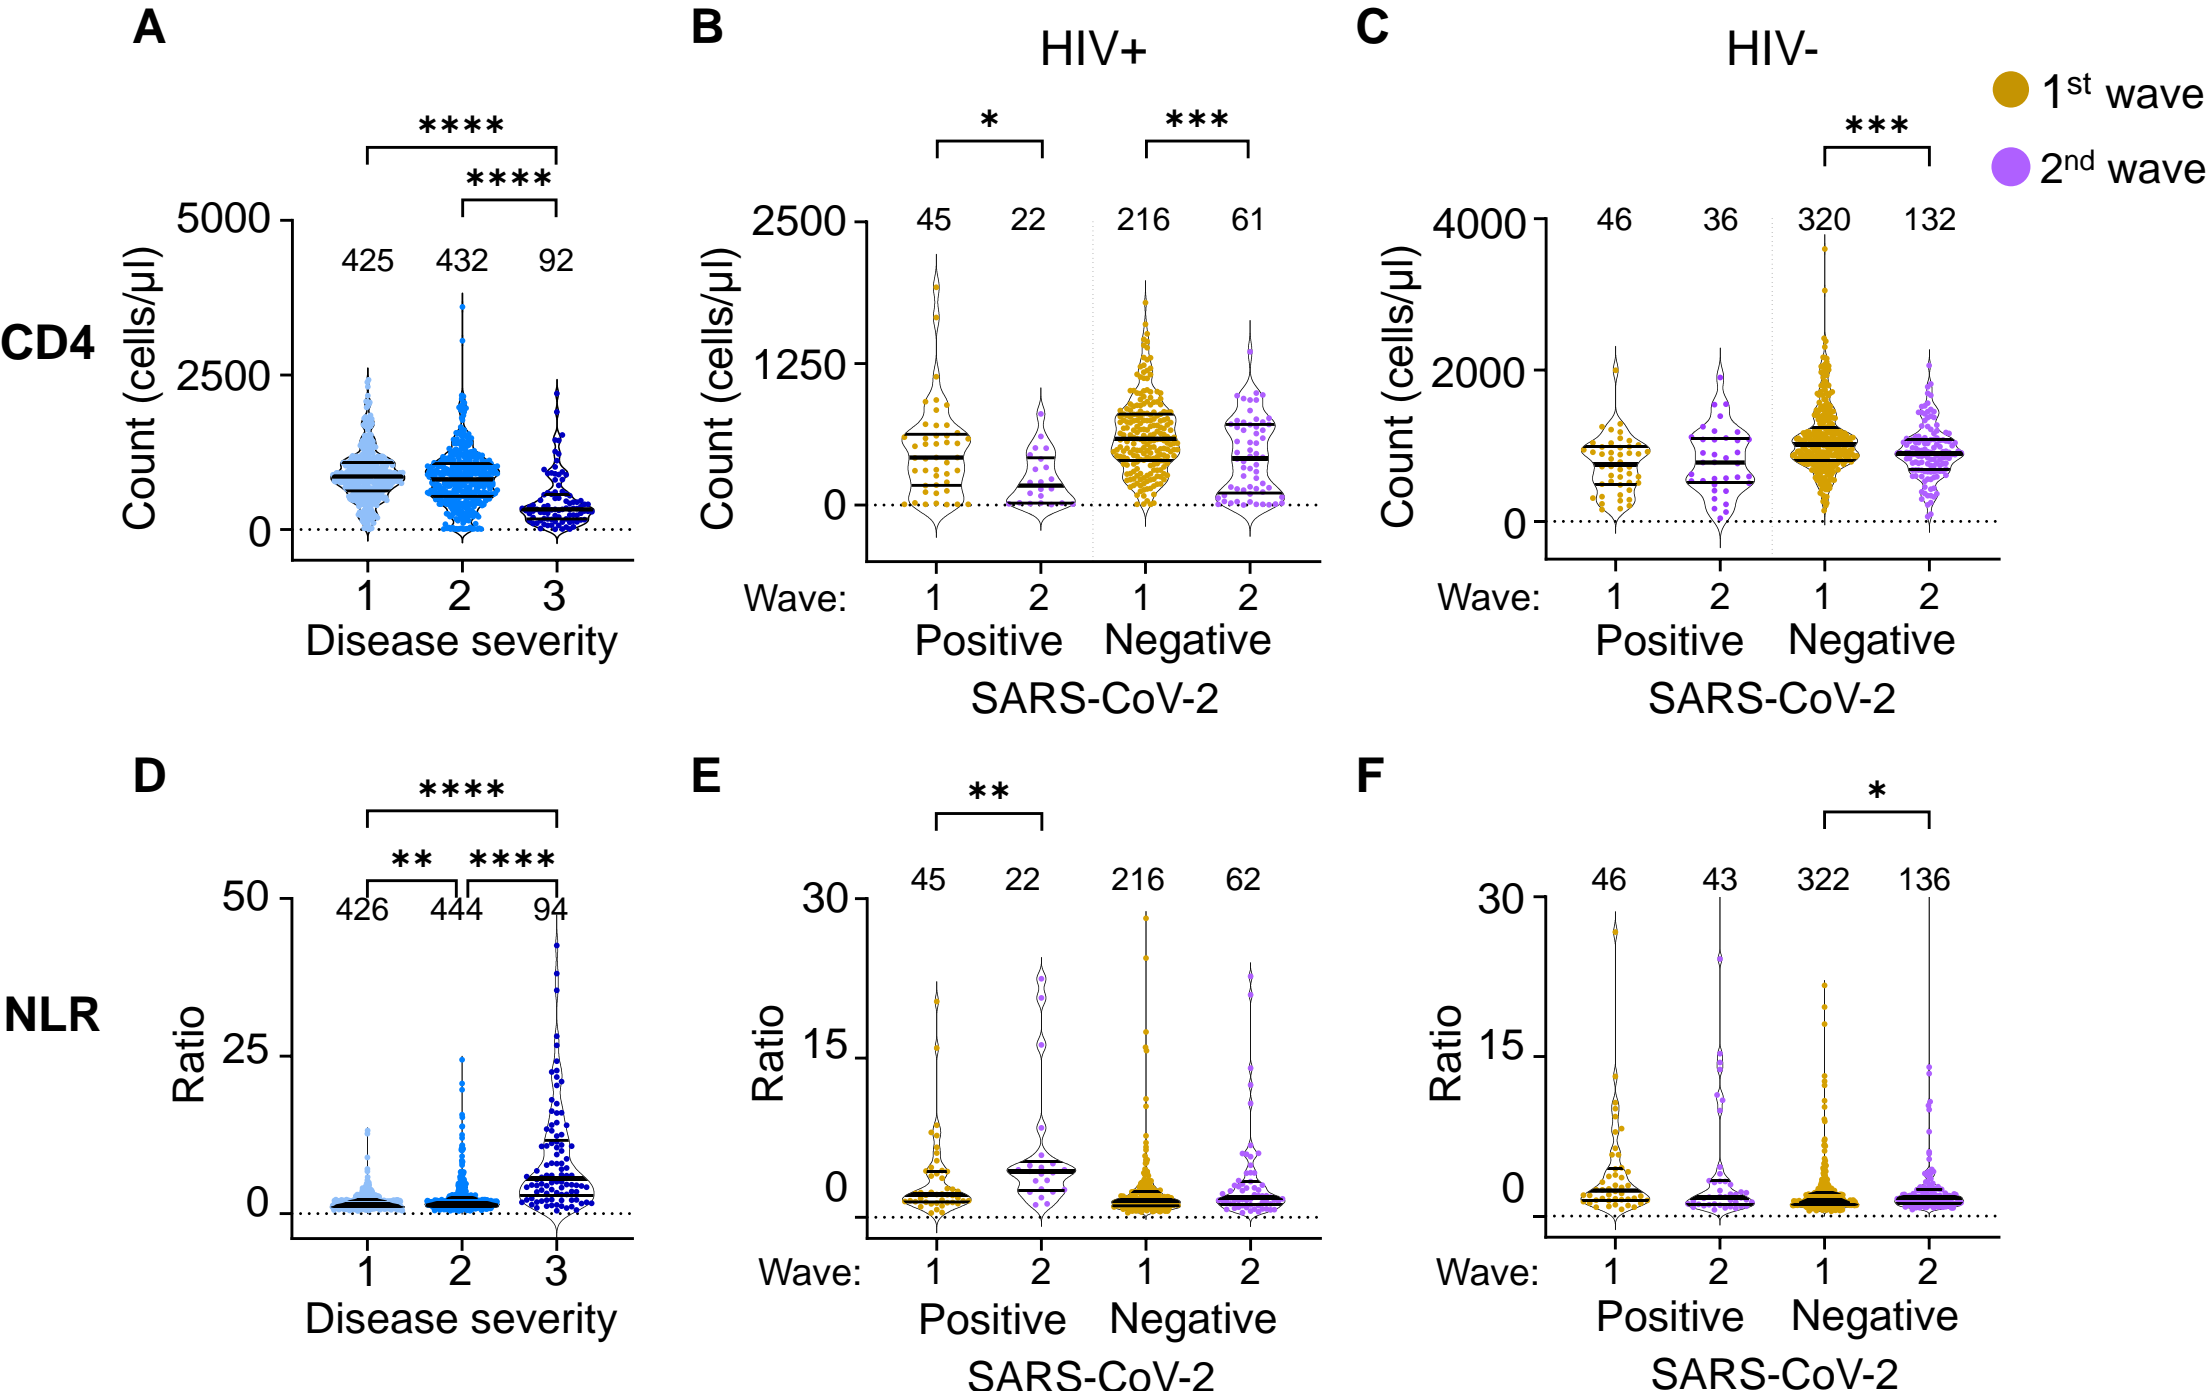

Supplement: supp [file elife-67397-supp-v1.zip]

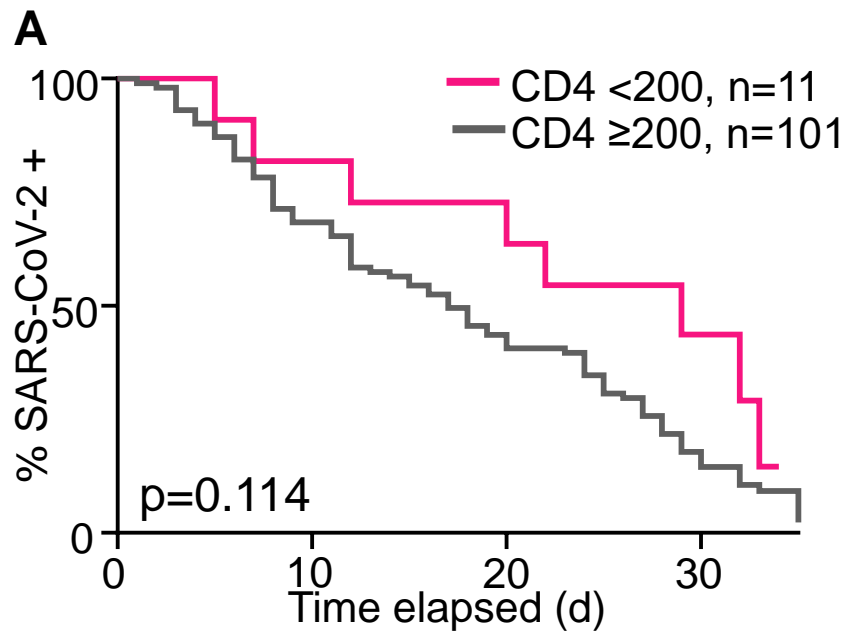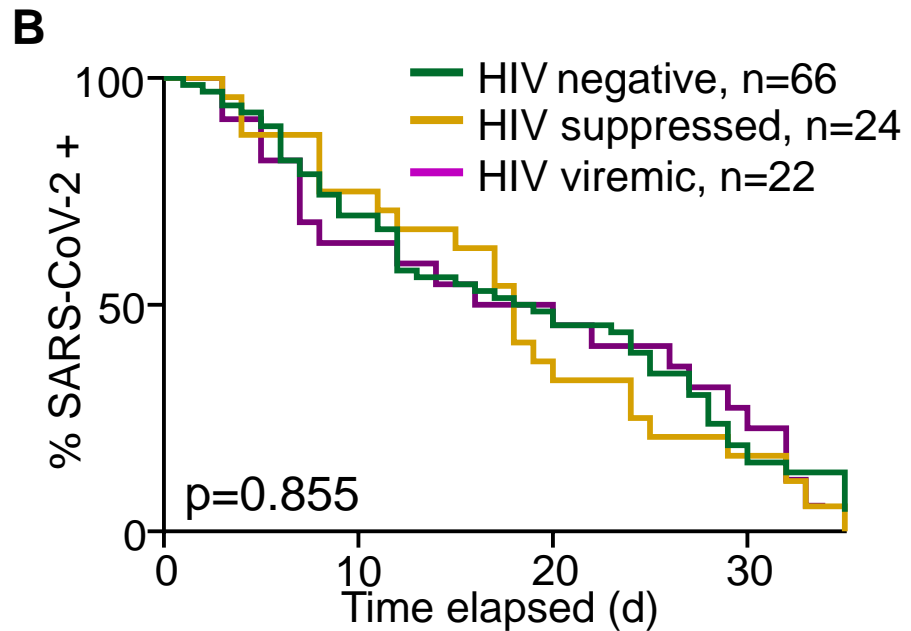

Supplement: supp [file elife-67397-supp-v1.zip]
